# Supplementary material for: Comparison of iRoot BP Plus and mineral trioxide aggregate for pulpotomy in primary molars under general anesthesia: a 3-year retrospective study
Source: PeerJ. 2024 Nov 12;12:e18453. doi: 10.7717/peerj.18453 (PMC11566509; doi:10.7717/peerj.18453)
Supplement: Data S1 — The information of all patients recorded before propensity score matching, and the matching process. [file peerj-12-18453-s001.xlsx]

## Sheet: MTA
	basic patient information								decayed tooth surfaces							examination records				image records		treatment information			survival time	status	follow-up
sample number	patient number	gender	age	date of birth	date of treatment	tooth position	maxillary or mandibular tooth	first primary molar or second primary molar	mesial surface	distal surface	buccal surface	lingual surface	occlusal caries	axial caries	number of decayed tooth surfaces	gingival tissues	tooth mobility	perforation of pulp chamber	diagnosis	root resorption	furcation lesions	dentist	material	crown restoration			date of retreatment	diagnosis	tooth mobility	pain on percusion	gingival tissues	6 months	12 months	18 months	24 months	30 months	36 months	42 months	follow-up(year)	Normal replacement of teeth
		F-female; M-male	Directly recording precise age: For example, 2.50 means 2 and a half years old, and 7.75 means 7 years and 9 months old.	year-month-day	year-month-day	FDI World Dental Federation notation	0-maxillary teeth；1-mandibular teeth	0-first primary molar；1-second primary molar	0-no; 1-yes	0-no; 1-yes	0-no; 1-yes	0-no; 1-yes	0-no; 1-yes	Mesial or distal or buccal or lingual surface: 0-no; 1-yes		0-No abnormality	0-(physiological)≤1mm; I-(physiological)>1 mm, but<2 mm; II->2 mm, but<3 mm; III-≥3mm	0-No abnormality		0-No abnormality; 1-Surface resorption; 2-Mid-root resorption; 3-Extensive root resorption	0-No abnormality;1-Density changes	1-dentist 1;2-dentist 2...	0-MTA;1-iRoot BP Plus	SSC-Stainless Steel Crown	(months)	fail-0；success-1	year-month-day	"-"means that no clinical examination abnormalities were found during follow-up	0-(physiological)≤1mm; I-(physiological)>1 mm, but<2 mm; II->2 mm, but<3 mm; III-≥3mm	“-” Negative；“±” weak positive；“＋”positive	"-"means no abnormalities	"-"means no radiographic abnormalities were observed; I°external root resorption-Surface resorption; II°external root resorption-Mid-root resorption; III°external root resorption-Extensive root resorption; I°root furcation shadow-Inter-radicular trabeculation or variation in radiodensity;II°root furcation shadow-Minor inter-radicular radiolucency with trabeculation still present;III°root furcatio…								0-No tooth replacement occurred during the observation period； 1-Normal replacement of teeth
1	1	M	4.18082	2015-9-22	2019-11-26	74	1	0	1	1	1	0	1	1	4	0	0	0	deep caries	0	0	7	0	SSC	6	1		-				-							0.5	0
2	1	M	4.18082	2015-9-22	2019-11-26	75	1	1	1	1	1	1	1	1	5	0	0	0	deep caries, calcification imperfecta	0	0	7	0	SSC	6	1		-				-							0.5	0
3	2	M	6.61918	2013-3-31	2019-11-10	55	0	1	1	0	0	1	1	1	3	0	0	0	deep caries	0	0	7	0	SSC	6	0	2019-12-26	chronic periapical periodontitis with space infection	I	+	redness and swelling	chronic periapical periodontitis							0.5	0
4	3	M	4.98904	2014-10-24	2019-10-19	84	1	0	0	1	0	1	1	1	3	0	0	0	deep caries	0	0	4	0	SSC	6	0		-				internal root resorption							0.5	0
5	4	M	3.98356	2015-7-23	2019-7-16	74	1	0	1	1	1	0	1	1	4	0	0	0	deep caries	0	0	1	0	SSC	12	1		-				-	-						1	0
6	4	M	3.98356	2015-7-23	2019-7-16	84	1	0	1	1	1	0	1	1	4	0	0	0	deep caries	0	0	1	0	SSC	12	1		-				-	-						1	0
7	5	M	4.04384	2015-7-14	2019-7-29	54	0	0	0	1	0	0	1	1	2	0	0	0	deep caries	0	0	1	0	SSC	12	1		-				-	-						1	0
8	5	M	4.04384	2015-7-14	2019-7-29	74	1	0	1	1	0	0	1	1	3	0	0	0	deep caries	0	0	1	0	SSC	12	1		-				-	-						1	0
9	5	M	4.04384	2015-7-14	2019-7-29	84	1	0	1	1	0	0	1	1	3	0	0	0	deep caries	0	0	1	0	SSC	12	1		-				-	-						1	0
10	5	M	4.04384	2015-7-14	2019-7-29	85	1	1	1	0	1	0	1	1	3	0	0	0	deep caries	0	0	1	0	SSC	12	1		-				-	-						1	0
11	6	M	4.11781	2015-7-9	2019-8-20	65	0	1	0	0	0	1	1	1	2	0	0	0	deep caries	0	0	4	0	SSC	12	1		-				-	-						1	0
12	7	M	2.83836	2016-8-15	2019-6-17	54	0	0	1	1	1	1	1	1	5	0	0	0	deep caries	0	0	1	0	SSC	18	1		-				-	-	-					1.5	0
13	7	M	2.83836	2016-8-15	2019-6-17	74	1	0	1	1	1	1	1	1	5	0	0	0	deep caries	0	0	1	0	SSC	18	1		-				-	-	-					1.5	0
14	7	M	2.83836	2016-8-15	2019-6-17	84	1	0	1	1	1	1	1	1	5	0	0	0	deep caries	0	0	1	0	SSC	18	1		-				-	-	-					1.5	0
15	8	F	3.60822	2016-1-4	2019-8-13	54	0	0	0	1	1	0	1	1	3	0	0	0	deep caries	0	0	7	0	SSC	18	1		-				-	-	-					1.5	0
16	8	F	3.60822	2016-1-4	2019-8-13	74	1	0	1	1	1	0	1	1	4	0	0	0	deep caries	0	0	7	0	SSC	18	1		-				-	-	-					1.5	0
17	8	F	3.60822	2016-1-4	2019-8-13	75	1	1	1	0	0	0	1	1	2	0	0	0	deep caries	0	0	7	0	SSC	18	1		-				-	-	-					1.5	0
18	8	F	3.60822	2016-1-4	2019-8-13	84	1	0	0	0	1	0	1	1	2	0	0	0	deep caries	0	0	7	0	SSC	18	1		-				-	-	-					1.5	0
19	8	F	3.60822	2016-1-4	2019-8-13	85	1	1	0	0	0	0	1	0	1	0	0	0	deep caries	0	0	7	0	SSC	18	1		-				-	-	pulp canal obliteration					1.5	0
20	9	M	7.06575	2012-11-3	2019-11-26	55	0	1	0	0	0	0	1	0	1	0	0	0	secondary deep caries	0	0	4	0	SSC	18	1		-				-	-	-					1.5	0
21	9	M	7.06575	2012-11-3	2019-11-26	75	1	1	1	0	0	0	1	1	2	0	0	0	deep caries	0	0	4	0	SSC	18	1		-				-	-	-					1.5	0
22	9	M	7.06575	2012-11-3	2019-11-26	85	1	1	1	0	0	0	1	1	2	0	0	0	deep caries	0	0	4	0	SSC	18	1		-				-	-	-					1.5	0
23	10	M	8.06849	2011-11-10	2019-12-3	55	0	1	1	0	0	0	1	1	2	0	0	0	deep caries	0	0	4	0	SSC	18	1		-				-	-	-					1.5	0
24	11	M	3.83562	2015-9-19	2019-7-20	54	0	0	1	1	1	0	1	1	4	0	0	0	deep caries	0	0	1	0	SSC	18	1		-				-	-	-					1.5	0
25	11	M	3.83562	2015-9-19	2019-7-20	64	0	0	1	1	1	0	1	1	4	0	0	0	deep caries	0	0	1	0	SSC	18	1		-				-	-	-					1.5	0
26	11	M	3.83562	2015-9-19	2019-7-20	74	1	0	1	1	1	1	1	1	5	0	0	0	deep caries	0	0	1	0	SSC	18	1		-				-	-	-					1.5	0
27	11	M	3.83562	2015-9-19	2019-7-20	75	1	1	0	0	1	0	1	1	2	0	0	0	secondary deep caries	0	0	1	0	SSC	18	1		-				-	-	-					1.5	0
28	11	M	3.83562	2015-9-19	2019-7-20	84	1	0	1	0	1	1	1	1	4	0	0	0	deep caries	0	0	1	0	SSC	18	1		-				-	-	-					1.5	0
29	12	F	4.35068	2015-3-22	2019-7-27	54	0	0	1	1	1	1	1	1	5	0	0	0	deep caries	0	0	7	0	SSC	18	1		-				-	-	-					1.5	0
30	12	F	4.35068	2015-3-22	2019-7-27	64	0	0	1	1	1	0	1	1	4	0	0	0	deep caries	0	0	7	0	SSC	18	1		-				-	-	-					1.5	0
31	12	F	4.35068	2015-3-22	2019-7-27	75	1	1	0	0	0	0	1	0	1	0	0	0	secondary deep caries	0	0	7	0	SSC	18	1		-				-	-	-					1.5	0
32	13	M	6.46849	2013-1-30	2019-7-18	74	1	0	0	1	1	0	1	1	3	0	0	0	deep caries	0	0	2	0	SSC	18	1		-				-	-	-					1.5	0
33	13	M	6.46849	2013-1-30	2019-7-18	75	1	1	1	1	1	1	1	1	5	0	0	0	deep caries	0	0	2	0	SSC	18	1		-				-	-	-					1.5	0
34	14	M	4.46575	2015-2-17	2019-8-4	54	0	0	1	1	1	0	1	1	4	0	0	0	deep caries	0	0	2	0	SSC	30	1		-				-	-	-					2.5	0
35	14	M	4.46575	2015-2-17	2019-8-4	75	1	1	1	1	1	1	1	1	5	0	0	0	deep caries	0	0	2	0	SSC	30	1		-				-	-	-					2.5	0
36	14	M	4.46575	2015-2-17	2019-8-4	84	1	0	1	1	0	1	1	1	4	0	0	0	deep caries	0	0	2	0	SSC	30	1		-				-	-	-					2.5	0
37	14	M	4.46575	2015-2-17	2019-8-4	85	1	1	1	0	1	1	1	1	4	0	0	0	deep caries	0	0	2	0	SSC	30	1		-				-	-	-					2.5	0
38	15	M	5.28219	2014-5-1	2019-8-10	74	1	0	1	1	1	1	1	1	5	0	0	0	deep caries	0	0	2	0	SSC	18	1		-				-	-	-					1.5	0
39	15	M	5.28219	2014-5-1	2019-8-10	75	1	1	1	1	1	1	1	1	5	0	0	0	deep caries	0	0	2	0	SSC	18	1		-				-	-	-					1.5	0
40	16	M	6.00274	2013-8-18	2019-8-17	75	1	1	1	1	1	1	1	1	5	0	0	0	deep caries	0	0	2	0	SSC	18	1		-				-	-	-					1.5	0
41	17	F	5.73699	2013-11-30	2019-8-24	54	0	0	0	1	1	0	1	1	3	0	0	0	deep caries	0	0	2	0	SSC	18	1		-				-	-	-					1.5	0
42	17	F	5.73699	2013-11-30	2019-8-24	55	0	1	1	0	0	1	1	1	3	0	0	0	deep caries	0	0	2	0	SSC	18	1		-				-	-	-					1.5	0
43	17	F	5.73699	2013-11-30	2019-8-24	64	0	0	1	0	0	1	1	1	3	0	0	0	deep caries	0	0	2	0	SSC	18	1		-				-	-	-					1.5	0
44	17	F	5.73699	2013-11-30	2019-8-24	74	1	0	1	1	1	1	1	1	5	0	0	0	deep caries	0	0	2	0	SSC	18	1		-				-	-	-					1.5	0
45	17	F	5.73699	2013-11-30	2019-8-24	75	1	1	1	1	1	1	1	1	5	0	0	0	deep caries	0	0	2	0	SSC	18	1		-				-	-	-					1.5	0
46	17	F	5.73699	2013-11-30	2019-8-24	84	1	0	0	1	0	0	1	1	2	0	0	0	deep caries	0	0	2	0	SSC	18	1		-				-	-	-					1.5	0
47	18	M	6.32877	2013-4-29	2019-8-25	54	0	0	0	1	0	0	1	1	2	0	0	0	deep caries	0	0	7	0	SSC	18	1		-				-	-	-					1.5	0
48	18	M	6.32877	2013-4-29	2019-8-25	74	1	0	0	1	0	1	1	1	3	0	0	0	deep caries	0	0	7	0	SSC	18	1		-				-	-	-					1.5	0
49	18	M	6.32877	2013-4-29	2019-8-25	75	1	1	1	1	1	0	1	1	4	0	0	0	deep caries	0	0	7	0	SSC	18	1		-				-	-	-					1.5	0
50	18	M	6.32877	2013-4-29	2019-8-25	85	1	1	1	1	1	1	1	1	5	0	0	0	deep caries	0	0	7	0	SSC	18	1		-				-	-	-					1.5	0
51	19	F	4.2	2015-6-20	2019-8-31	54	0	0	1	1	1	0	1	1	4	0	0	0	deep caries	0	0	7	0	SSC	18	1		-				-	-	-					1.5	0
52	19	F	4.2	2015-6-20	2019-8-31	64	0	0	1	1	1	1	1	1	5	0	0	0	deep caries	0	0	7	0	SSC	18	1		-				-	-	-					1.5	0
53	19	F	4.2	2015-6-20	2019-8-31	74	1	0	1	1	1	1	1	1	5	0	0	0	deep caries	0	0	7	0	SSC	18	1		-				-	-	-					1.5	0
54	19	F	4.2	2015-6-20	2019-8-31	75	1	1	1	1	1	1	1	1	5	0	0	0	deep caries	0	0	7	0	SSC	18	1		-				-	-	-					1.5	0
55	20	M	4.79452	2014-12-7	2019-9-21	74	1	0	0	1	0	0	1	1	2	0	0	0	deep caries	0	0	2	0	SSC	18	1		-				-	-	-					1.5	0
56	21	M	3.19726	2016-8-9	2019-10-19	54	0	0	0	0	0	0	1	0	1	0	0	0	deep caries	0	0	2	0	SSC	18	1		-				-	-	-					1.5	0
57	21	M	3.19726	2016-8-9	2019-10-19	64	0	0	0	1	0	0	1	1	2	0	0	0	deep caries	0	0	2	0	SSC	18	1		-				-	-	-					1.5	0
58	21	M	3.19726	2016-8-9	2019-10-19	74	1	0	0	1	0	0	1	1	2	0	0	0	deep caries	0	0	2	0	SSC	18	1		-				-	-	-					1.5	0
59	22	F	4.02192	2015-10-26	2019-11-2	55	0	1	0	0	0	0	1	0	1	0	0	0	deep caries	0	0	7	0	SSC	18	1		-				-	-	-					1.5	0
60	22	F	4.02192	2015-10-26	2019-11-2	64	0	0	0	1	0	0	1	1	2	0	0	0	deep caries	0	0	7	0	SSC	18	1		-				-	-	-					1.5	0
61	22	F	4.02192	2015-10-26	2019-11-2	74	1	0	0	1	0	0	1	1	2	0	0	0	deep caries	0	0	7	0	SSC	18	1		-				-	-	-					1.5	0
62	22	F	4.02192	2015-10-26	2019-11-2	75	1	1	1	0	1	0	1	1	3	0	0	0	deep caries	0	0	7	0	SSC	18	1		-				-	-	-					1.5	0
63	22	F	4.02192	2015-10-26	2019-11-2	84	1	0	0	1	0	0	1	1	2	0	0	0	deep caries	0	0	7	0	SSC	18	1		-				-	-	-					1.5	0
64	22	F	4.02192	2015-10-26	2019-11-2	85	1	1	1	1	1	0	1	1	4	0	0	0	deep caries	0	0	7	0	SSC	18	1		-				-	-	-					1.5	0
65	23	M	6.61918	2013-3-31	2019-11-10	54	0	0	1	1	1	1	1	1	5	0	0	0	deep caries	0	0	7	0	SSC	18	1		-				-	-	-					1.5	0
66	23	M	6.61918	2013-3-31	2019-11-10	74	1	0	0	1	1	0	1	1	3	0	0	0	deep caries	0	0	7	0	SSC	18	0	2021-04-15	chronic periapical periodontitis	0	-	-	-	-	chronic periapical periodontitis					1.5	0
67	24	M	4.01918	2015-11-24	2019-11-30	84	1	0	1	1	1	1	1	1	5	0	0	0	deep caries	0	0	2	0	SSC	18	1		-				-	-	-					1.5	0
68	25	F	4.75616	2014-5-30	2019-3-1	54	0	0	0	1	0	0	1	1	2	0	0	0	deep caries	0	0	7	0	SSC	18	1		-				-	-	-					1.5	0
69	25	F	4.75616	2014-5-30	2019-3-1	65	0	1	1	0	0	1	1	1	3	0	0	0	deep caries	0	0	7	0	SSC	18	1		-				-	-	-					1.5	0
70	26	M	4.71781	2014-10-11	2019-6-29	64	0	0	1	1	0	0	1	1	3	0	0	0	deep caries	0	0	1	0	SSC	18	1		-				-	-	-					1.5	0
71	26	M	4.71781	2014-10-11	2019-6-29	65	0	1	1	0	0	0	1	1	2	0	0	0	deep caries	0	0	1	0	SSC	18	1		-				-	-	-					1.5	0
72	27	M	5.18356	2014-8-7	2019-10-12	64	0	0	0	1	1	0	1	1	3	0	0	0	deep caries	0	0	7	0	SSC	18	1		-				-	-	-					1.5	0
73	28	M	4.73151	2015-3-8	2019-11-29	54	0	0	1	1	1	1	1	1	5	0	0	0	deep caries	0	0	4	0	SSC	18	1		-				-	-	-					1.5	0
74	28	M	4.73151	2015-3-8	2019-11-29	55	0	1	1	1	1	1	1	1	5	0	0	0	deep caries	0	0	4	0	SSC	18	1		-				-	-	-					1.5	0
75	28	M	4.73151	2015-3-8	2019-11-29	65	0	1	1	0	0	1	1	1	3	0	0	0	deep caries	0	0	4	0	SSC	18	1		-				-	-	-					1.5	0
76	28	M	4.73151	2015-3-8	2019-11-29	84	1	0	0	1	0	0	1	1	2	0	0	0	deep caries	0	0	4	0	SSC	18	1		-				-	-	-					1.5	0
77	29	M	3.81918	2016-2-18	2019-12-13	55	0	1	0	0	1	1	1	1	3	0	0	0	deep caries	0	0	1	0	SSC	18	0	2021-06-03	chronic periapical periodontitis	0	+	pustules	-	-	II°root furcation shadow					1.5	0
78	29	M	3.81918	2016-2-18	2019-12-13	64	0	0	1	1	1	1	1	1	5	0	0	0	deep caries	0	0	1	0	SSC	18	0	2021-06-03	chronic periapical periodontitis	0	-	-	-	-	II°root furcation shadow					1.5	0
79	30	M	4.54795	2014-7-8	2019-1-23	75	1	1	1	1	1	1	1	1	5	0	0	0	deep caries	0	0	3	0	SSC	18	1		-				-	-	-					1.5	0
80	31	M	4.73699	2015-2-4	2019-10-30	75	1	1	1	0	0	0	1	1	2	0	0	0	deep caries	0	0	2	0	SSC	18	1		-				-	-	-					1.5	0
81	31	M	4.73699	2015-2-4	2019-10-30	84	1	0	0	1	0	0	1	1	2	0	0	0	deep caries	0	0	2	0	SSC	18	1		-				-	-	-					1.5	0
82	31	M	4.73699	2015-2-4	2019-10-30	85	1	1	0	1	0	0	1	1	2	0	0	0	deep caries	0	0	2	0	SSC	18	1		-				-	-	-					1.5	0
83	32	F	4.06301	2015-11-12	2019-12-4	54	0	0	0	1	1	1	1	1	4	0	0	0	deep caries	0	0	3	0	SSC	18	1		-				-	-	-					1.5	0
84	32	F	4.06301	2015-11-12	2019-12-4	84	1	0	0	1	0	0	1	1	2	0	0	0	deep caries	0	0	3	0	SSC	18	1		-				-	-	-					1.5	0
85	33	M	6.21096	2013-1-1	2019-3-18	54	0	0	1	1	1	0	1	1	4	0	0	0	deep caries	0	0	1	0	SSC	30	1	2021-08-07	Retained deciduous teeth	II	-	-	-	-	-	-	Retained deciduous teeth			2.5	0
86	33	M	6.21096	2013-1-1	2019-3-18	55	0	1	1	1	0	1	0	1	3	0	0	0	deep caries	0	0	1	0	SSC	30	0	2021-08-07	chronic periapical periodontitis	I	-	fistula	-	-	-	-	chronic periapical periodontitis			2.5	0
87	33	M	6.21096	2013-1-1	2019-3-18	64	0	0	1	1	0	0	1	1	3	0	0	0	deep caries	0	0	1	0	SSC	30	1		-				-	-	-	-				2.5	0
88	34	M	4.08767	2015-7-5	2019-8-5	65	0	1	1	1	1	1	0	1	4	0	0	0	deep caries	0	0	7	0	SSC	24	1		-				-	-	-	-				2	0
89	35	M	4.2	2015-6-2	2019-8-13	64	0	0	0	0	0	0	1	0	1	0	0	0	deep caries	0	0	4	0	SSC	24	1		-				-	-	-	-				2	0
90	35	M	4.2	2015-6-2	2019-8-13	65	0	1	1	0	1	1	1	1	4	0	0	0	deep caries	0	0	4	0	SSC	24	1		-				-	-	-	-				2	0
91	35	M	4.2	2015-6-2	2019-8-13	75	1	1	1	1	1	1	1	1	5	0	0	0	deep caries	0	0	4	0	SSC	24	1		-				-	-	-	-				2	0
92	36	F	2.86849	2017-2-3	2019-12-17	74	1	0	0	1	0	0	1	1	2	0	0	0	deep caries	0	0	7	0	SSC	24	1		-				-	-	-	Dentin bridge				2	0
93	36	F	2.86849	2017-2-3	2019-12-17	54	0	0	1	1	1	1	1	1	5	0	0	0	deep caries	0	0	7	0	SSC	24	1		-				-	-	-	-				2	0
94	36	F	2.86849	2017-2-3	2019-12-17	64	0	0	1	1	1	0	1	1	4	0	0	0	deep caries	0	0	7	0	SSC	24	1		-				-	-	-	-				2	0
95	36	F	2.86849	2017-2-3	2019-12-17	84	1	0	1	0	0	1	1	1	3	0	0	0	deep caries	0	0	7	0	SSC	24	1		-				-	-	-	-				2	0
96	37	M	3.31781	2015-11-15	2019-3-10	54	0	0	1	1	0	0	1	1	3	0	0	0	deep caries	0	0	1	0	SSC	24	1		-				-	-	-	-				2	0
97	38	M	5.27397	2013-12-23	2019-3-31	55	0	1	1	0	0	0	1	1	2	0	0	0	deep caries	0	0	4	0	SSC	42	1	2021-08-10	deep caries after pulpotomy	0	-	-	-	-	-	-				2	0
98	38	M	5.27397	2013-12-23	2019-3-31	84	1	0	0	1	0	0	1	1	2	0	0	0	deep caries	0	0	4	0	SSC	24	1		-				-	-	-	-				2	0
99	39	F	5.78082	2013-7-11	2019-4-20	65	0	1	1	0	1	0	1	1	3	0	0	0	secondary deep caries	0	0	1	0	SSC	24	1		-				-	-	-	-				2	0
100	40	F	6.48219	2012-12-24	2019-6-16	74	1	0	0	1	0	0	1	1	2	0	0	0	deep caries	0	0	1	0	SSC	30	1	2021-07-31	Retained deciduous teeth	I	-	-	-	-	-	-	Retained deciduous teeth			2	0
101	41	M	3.10411	2016-5-31	2019-7-7	84	1	0	0	0	1	1	1	1	3	0	0	0	deep caries	0	0	2	0	SSC	24	1		-				-	-	-	-				2	0
102	42	M	4.11233	2015-7-16	2019-8-25	74	1	0	0	0	1	0	1	1	2	0	0	0	deep caries	0	0	2	0	SSC	24	1		-				-	-	-	-				2	0
103	42	M	4.11233	2015-7-17	2019-8-26	85	1	1	1	0	1	1	1	1	4	0	0	0	deep caries	0	0	2	0	SSC	24	1		-				-	-	-	-				2	0
104	43	M	4.36438	2015-5-12	2019-9-21	54	0	0	0	0	1	1	1	1	3	0	0	0	deep caries	0	0	1	0	SSC	24	1		-				-	-	-	-				2	0
105	43	M	4.36438	2015-5-12	2019-9-21	64	0	0	0	0	1	1	1	1	3	0	0	0	deep caries	0	0	1	0	SSC	24	1		-				-	-	-	-				2	0
106	44	M	4.7726	2015-2-9	2019-11-16	55	0	1	1	0	1	1	1	1	4	0	0	0	deep caries	0	0	7	0	SSC	24	1		-				-	-	-	-				2	0
107	44	M	4.7726	2015-2-9	2019-11-16	65	0	1	1	0	1	1	1	1	4	0	0	0	deep caries	0	0	7	0	SSC	24	1		-				-	-	-	-				2	0
108	44	M	4.7726	2015-2-9	2019-11-16	74	1	0	1	1	1	1	1	1	5	0	0	0	deep caries	0	0	7	0	SSC	24	1		-				-	-	-	-				2	0
109	44	M	4.7726	2015-2-9	2019-11-16	75	1	1	0	1	1	1	1	1	4	0	0	0	deep caries	0	0	7	0	SSC	24	1		-				-	-	-	-				2	0
110	44	M	4.7726	2015-2-9	2019-11-16	84	1	0	1	1	1	1	1	1	5	0	0	0	deep caries	0	0	7	0	SSC	24	1		-				-	-	-	-				2	0
111	45	M	4.52603	2015-6-20	2019-12-28	54	0	0	1	1	1	1	1	1	5	0	0	0	deep caries	0	0	1	0	SSC	24	1		-				-	-	-	-				2	0
112	45	M	4.52603	2015-6-20	2019-12-28	55	0	1	1	1	1	1	1	1	5	0	0	0	deep caries	0	0	1	0	SSC	24	1		-				-	-	-	-				2	0
113	45	M	4.52603	2015-6-20	2019-12-28	64	0	0	1	1	1	1	1	1	5	0	0	0	deep caries	0	0	1	0	SSC	24	1		-				-	-	-	-				2	0
114	45	M	4.52603	2015-6-20	2019-12-28	65	0	1	0	0	1	1	1	1	3	0	0	0	deep caries	0	0	1	0	SSC	24	1		-				-	-	-	-				2	0
115	45	M	4.52603	2015-6-20	2019-12-28	74	1	0	0	1	1	1	1	1	4	0	0	0	deep caries	0	0	1	0	SSC	24	1		-				-	-	-	-				2	0
116	45	M	4.52603	2015-6-20	2019-12-28	75	1	1	1	0	1	1	1	1	4	0	0	0	deep caries	0	0	1	0	SSC	24	1		-				-	-	-	-				2	0
117	45	M	4.52603	2015-6-20	2019-12-28	84	1	0	0	1	1	1	1	1	4	0	0	0	deep caries	0	0	1	0	SSC	24	1		-				-	-	-	-				2	0
118	46	M	2.82192	2017-3-5	2019-12-29	64	0	0	1	1	1	1	1	1	5	0	0	0	deep caries	0	0	1	0	SSC	24	1		-				-	-	-	-				2	0
119	46	M	2.82192	2017-3-5	2019-12-29	74	1	0	1	0	0	1	1	1	3	0	0	0	deep caries	0	0	1	0	SSC	24	1		-				-	-	-	-				2	0
120	46	M	2.82192	2017-3-5	2019-12-29	84	1	0	1	1	1	1	1	1	5	0	0	0	deep caries	0	0	1	0	SSC	24	1		-				-	-	-	-				2	0
121	47	F	4.30959	2014-10-27	2019-2-16	75	1	1	1	1	1	1	1	1	5	0	0	0	deep caries	0	0	1	0	SSC	24	1		-				-	-	-	-				2	0
122	47	F	4.30959	2014-10-27	2019-2-16	84	1	0	1	1	0	0	1	1	3	0	0	0	deep caries	0	0	1	0	SSC	24	1		-				-	-	-	-				2	0
123	48	F	4.83014	2014-4-26	2019-2-22	75	1	1	1	0	1	1	1	1	4	0	0	0	deep caries	0	0	2	0	SSC	24	1		-				-	-	-	-				2	0
124	49	M	4.45753	2014-10-15	2019-3-30	54	0	0	0	1	0	0	1	1	2	0	0	0	deep caries	0	0	7	0	SSC	24	1		-				-	-	-	-				2	0
125	49	M	4.45753	2014-10-15	2019-3-30	55	0	1	1	0	1	1	1	1	4	0	0	0	deep caries	0	0	7	0	SSC	24	1		-				-	-	-	-				2	0
126	49	M	4.45753	2014-10-15	2019-3-30	74	1	0	1	1	0	0	1	1	3	0	0	0	deep caries	0	0	7	0	SSC	24	1		-				-	-	-	-				2	0
127	49	M	4.45753	2014-10-15	2019-3-30	75	1	1	1	1	1	0	1	1	4	0	0	0	deep caries	0	0	7	0	SSC	24	1		-				-	-	-	-				2	0
128	49	M	4.45753	2014-10-15	2019-3-30	84	1	0	1	1	0	0	1	1	3	0	0	0	deep caries	0	0	7	0	SSC	24	1		-				-	-	-	-				2	0
129	49	M	4.45753	2014-10-15	2019-3-30	85	1	1	1	1	1	0	1	1	4	0	0	0	deep caries	0	0	7	0	SSC	24	1		-				-	-	-	-				2	0
130	50	F	5.3863	2014-2-23	2019-7-12	85	1	1	1	1	1	1	1	1	5	0	0	0	chronic reversible pulpitis	0	0	3	0	SSC	24	1		-				-	-	-	-				2	0
131	51	M	4.54521	2014-12-27	2019-7-13	64	0	0	1	1	0	1	1	1	4	0	0	0	deep caries	0	0	7	0	SSC	24	1		-				-	-	-	-				2	0
132	52	M	4.25753	2015-4-24	2019-7-26	54	0	0	0	1	0	1	1	1	3	0	0	0	deep caries	0	0	4	0	SSC	24	1		-				-	-	-	-				2	0
133	52	M	4.25753	2015-4-24	2019-7-26	85	1	1	1	0	0	0	1	1	2	0	0	0	deep caries	0	0	4	0	SSC	30	1	2021-12-10	deep caries after pulpotomy	0	-	-	-	-	-	-	middle caries			2	0
134	53	M	5.97808	2013-8-12	2019-8-2	55	0	1	1	1	0	1	1	1	4	0	0	0	deep caries	0	0	3	0	SSC	24	1		-				-	-	-	-				2	0
135	53	M	5.97808	2013-8-12	2019-8-2	65	0	1	1	1	0	1	1	1	4	0	0	0	deep caries	0	0	3	0	SSC	24	1		-				-	-	-	-				2	0
136	54	M	4.81918	2014-10-22	2019-8-16	54	0	0	1	1	1	1	1	1	5	0	0	0	deep caries	0	0	3	0	SSC	24	1		-				-	-	-	-				2	0
137	54	M	4.81918	2014-10-22	2019-8-16	74	1	0	0	1	1	1	1	1	4	0	0	0	deep caries	0	0	3	0	SSC	24	1		-				-	-	-	-				2	0
138	54	M	4.81918	2014-10-22	2019-8-16	84	1	0	1	1	1	1	1	1	5	0	0	0	deep caries	0	0	3	0	SSC	24	1		-				-	-	-	-				2	0
139	55	M	3.87123	2015-10-4	2019-8-17	84	1	0	0	1	0	0	1	1	2	0	0	0	deep caries	0	0	6	0	SSC	24	0	2021-03-12	chronic periapical periodontitis	0	-	pustules	-	-	-	chronic periapical periodontitis				2	0
140	55	M	3.87123	2015-10-4	2019-8-17	85	1	1	1	1	0	0	1	1	3	0	0	0	deep caries	0	0	6	0	SSC	24	0	2021-10-29	chronic periapical periodontitis	0	-	-	-	-	-	chronic periapical periodontitis				2	0
141	56	F	2.76986	2016-11-16	2019-8-23	54	0	0	1	0	1	0	1	1	3	0	0	0	deep caries	0	0	4	0	SSC	24	1		-				-	-	-	-				2	0
142	56	F	2.76986	2016-11-16	2019-8-23	64	0	0	1	0	1	0	1	1	3	0	0	0	deep caries	0	0	4	0	SSC	24	1		-				-	-	-	-				2	0
143	56	F	2.76986	2016-11-16	2019-8-23	74	1	0	1	1	1	1	1	1	5	0	0	0	deep caries	0	0	4	0	SSC	24	1		-				-	-	-	-				2	0
144	56	F	2.76986	2016-11-16	2019-8-23	84	1	0	1	1	1	1	1	1	5	0	0	0	deep caries	0	0	4	0	SSC	24	1		-				-	-	-	-				2	0
145	57	M	5.54795	2014-2-7	2019-8-24	54	0	0	0	1	0	0	1	1	2	0	0	0	deep caries	0	0	4	0	SSC	24	1		-				-	-	-	-				2	0
146	58	M	4.89589	2014-10-8	2019-8-30	74	1	0	1	1	0	0	1	1	3	0	0	0	deep caries	0	0	3	0	SSC	24	1		-				-	-	-	-				2	0
147	58	M	4.89589	2014-10-8	2019-8-30	84	1	0	1	1	0	0	1	1	3	0	0	0	deep caries	0	0	3	0	SSC	18	0	2021-02-25	chronic periapical periodontitis	0	-	-	I°root furcation shadow	II°root furcation shadow	chronic periapical periodontitis					2	0
148	59	F	4.0137	2015-8-26	2019-8-30	74	1	0	0	1	0	1	1	1	3	0	0	0	deep caries	0	0	6	0	SSC	24	0	2021-06-29	chronic periapical periodontitis	0	-	-	-	-	-	chronic periapical periodontitis				2	0
149	60	M	6.40548	2013-4-20	2019-9-13	84	1	0	0	0	0	0	1	0	1	0	0	0	chronic reversible pulpitis	0	0	3	0	SSC	24	1		-				-	-	-	-				2	0
150	60	M	6.40548	2013-4-20	2019-9-13	85	1	1	1	0	1	1	1	1	4	0	0	0	deep caries	0	0	3	0	SSC	24	1		-				-	-	-	-				2	0
151	61	M	5.49863	2014-3-24	2019-9-21	65	0	1	1	0	1	0	1	1	3	0	0	0	deep caries	0	0	6	0	SSC	24	0	2021-10-10	chronic periapical periodontitis	0	-	pustules	-	-	-	chronic periapical periodontitis				2	0
152	62	M	4.24384	2015-7-15	2019-10-11	54	0	0	1	1	1	1	0	1	4	0	0	0	deep caries	0	0	1	0	SSC	24	1		-				-	-	-	-				2	0
153	62	M	4.24384	2015-7-15	2019-10-11	64	0	0	1	1	1	1	1	1	5	0	0	0	deep caries	0	0	1	0	SSC	24	1		-				-	-	-	-				2	0
154	62	M	4.24384	2015-7-15	2019-10-11	65	0	1	1	1	1	1	1	1	5	0	0	0	deep caries	0	0	1	0	SSC	24	1		-				-	-	-	-				2	0
155	63	F	4.32603	2015-6-17	2019-10-13	64	0	0	1	1	1	1	1	1	5	0	0	0	deep caries	0	0	7	0	SSC	24	1		-				-	-	-	-				2	0
156	63	F	4.32603	2015-6-17	2019-10-13	75	1	1	1	0	1	0	1	1	3	0	0	0	deep caries	0	0	7	0	SSC	24	1		-				-	-	-	-				2	0
157	63	F	4.32603	2015-6-17	2019-10-13	84	1	0	1	1	1	0	1	1	4	0	0	0	deep caries	0	0	7	0	SSC	24	1		-				-	-	-	-				2	0
158	64	F	3.92055	2015-11-26	2019-10-27	54	0	0	0	1	0	0	1	1	2	0	0	0	deep caries	0	0	7	0	SSC	24	1		-				-	-	-	-				2	0
159	64	F	3.92055	2015-11-26	2019-10-27	74	1	0	0	1	0	0	1	1	2	0	0	0	deep caries	0	0	7	0	SSC	24	1		-				-	-	-	-				2	0
160	64	F	3.92055	2015-11-26	2019-10-27	84	1	0	0	1	0	0	1	1	2	0	0	0	deep caries	0	0	7	0	SSC	24	1		-				-	-	-	-				2	0
161	64	F	3.92055	2015-11-26	2019-10-27	85	1	1	0	1	1	0	1	1	3	0	0	0	deep caries	0	0	7	0	SSC	24	1		-				-	-	-	-				2	0
162	65	F	4.05479	2015-1-13	2019-2-1	84	1	0	1	0	1	0	1	1	3	0	0	0	deep caries	0	0	1	0	SSC	24	1		-				-	-	-	-				2	0
163	66	M	4.15068	2015-1-19	2019-3-14	55	0	1	1	0	0	1	1	1	3	0	0	0	deep caries	0	0	3	0	SSC	24	1		-				-	-	-	-				2	0
164	66	M	4.15068	2015-1-19	2019-3-14	65	0	1	0	1	0	1	1	1	3	0	0	0	deep caries	0	0	3	0	SSC	24	1		-				-	-	-	-				2	0
165	67	M	5.32877	2014-5-9	2019-9-5	74	1	0	1	1	0	0	1	1	3	0	0	0	deep caries	0	0	3	0	SSC	24	1		-				-	-	-	-				2	0
166	67	M	5.32877	2014-5-9	2019-9-5	75	1	1	1	1	1	0	1	1	4	0	0	0	deep caries	0	0	3	0	SSC	24	1		-				-	-	-	-				2	0
167	68	F	3.8411	2015-11-4	2019-9-6	55	0	1	0	0	0	0	1	0	1	0	0	0	deep caries	0	0	3	0	SSC	24	1		-				-	-	-	-				2	0
168	69	F	3.56438	2016-2-27	2019-9-20	74	1	0	0	0	0	0	1	0	1	0	0	0	deep caries	0	0	3	0	SSC	24	1		-				-	I°root furcation shadow	I°root furcation shadow	I°root furcation shadow				2	0
169	69	F	3.56438	2016-2-27	2019-9-20	84	1	0	0	0	0	0	1	0	1	0	0	0	deep caries	0	0	3	0	SSC	24	1		-				-	-	pulp canal obliteration	pulp canal obliteration				2	0
170	70	M	6.90411	2012-11-24	2019-10-18	64	0	0	1	0	1	0	1	1	3	0	0	0	deep caries	0	0	1	0	SSC	24	1		-				-	-	-	-				2	0
171	70	M	6.90411	2012-11-24	2019-10-18	65	0	1	1	0	1	0	1	1	3	0	0	0	deep caries	0	0	1	0	SSC	24	1		-				-	-	-	-				2	0
172	71	F	4.47671	2015-5-12	2019-11-1	64	0	0	1	1	0	0	1	1	3	0	0	0	deep caries	0	0	2	0	SSC	24	1		-				-	-	-	-				2	0
173	71	F	4.47671	2015-5-12	2019-11-1	65	0	1	0	0	1	1	1	1	3	0	0	0	deep caries	0	0	2	0	SSC	24	1		-				-	-	-	-				2	0
174	72	F	3.66849	2016-3-16	2019-11-14	64	0	0	1	0	0	1	1	1	3	0	0	0	deep caries	0	0	3	0	SSC	24	1		-				-	-	-	-				2	0
175	72	F	3.66849	2016-3-16	2019-11-14	75	1	1	1	1	1	1	1	1	5	0	0	0	deep caries	0	0	3	0	SSC	24	1		-				-	-	-	pulp canal obliteration				2	0
176	73	M	4.05205	2015-10-27	2019-11-14	85	1	1	0	0	1	1	1	1	3	0	0	0	deep caries	0	0	3	0	SSC	24	1		-				-	-	-	-				2	0
177	74	F	7.01918	2012-11-25	2019-11-30	65	0	1	1	0	0	0	1	1	2	0	0	0	deep caries	0	0	3	0	SSC	24	1		-				-	-	-	-				2	0
178	75	M	4.33425	2015-8-22	2019-12-21	74	1	0	1	1	0	0	1	1	3	0	0	0	deep caries	0	0	5	0	SSC	24	1		-				-	-	-	-				2	0
179	75	M	4.33425	2015-8-22	2019-12-21	84	1	0	1	0	0	1	1	1	3	0	0	0	deep caries	0	0	5	0	SSC	24	1		-				-	-	-	-				2	0
180	76	M	3.07671	2016-5-3	2019-5-31	74	1	0	0	0	0	0	1	0	1	0	0	0	deep caries	0	0	1	0	SSC	24	1		-				-	-	-	pulp canal obliteration				2	0
181	76	M	3.07671	2016-5-3	2019-5-31	84	1	0	1	0	0	0	1	1	2	0	0	0	deep caries	0	0	1	0	SSC	24	1		-				-	-	-	I°root furcation shadow；calcified root canal				2	0
182	77	M	6.26027	2014-1-20	2020-4-23	55	0	1	0	0	0	0	1	0	1	0	0	0	deep caries	0	0	1	0	SSC	24	1		-				-	-	-	-				2	0
183	77	M	6.26027	2014-1-20	2020-4-23	74	1	0	0	1	0	0	1	1	2	0	0	0	deep caries	0	0	1	0	SSC	24	1		-				-	-	-	-				2	0
184	77	M	6.26027	2014-1-20	2020-4-23	85	1	1	1	1	1	1	1	1	5	0	0	0	deep caries	0	0	1	0	SSC	24	1		-				-	-	-	-				2	0
185	78	M	2.98356	2016-8-10	2019-8-3	74	1	0	1	1	1	1	1	1	5	0	0	0	deep caries	0	0	2	0	SSC	30	0	2021-11-26	chronic periapical periodontitis	0	-	-	-	-	-	-	II°external root resorption；II°root furcation shadow			2.5	0
186	79	F	2.91507	2016-2-1	2019-1-1	54	0	0	0	0	1	0	1	1	2	0	0	0	deep caries	0	0	1	0	SSC	30	1		-				-	-	-	-	-			2.5	0
187	79	F	2.91507	2016-2-1	2019-1-1	84	1	0	0	1	0	0	1	1	2	0	0	0	deep caries	0	0	1	0	SSC	30	1		-				-	-	-	-	-			2.5	0
188	79	F	2.91507	2016-2-1	2019-1-1	74	1	0	1	1	1	1	1	1	5	0	0	0	deep caries	0	0	1	0	SSC	30	1		-				-	-	-	-	-			2.5	0
189	80	F	5.64384	2013-12-14	2019-8-5	54	0	0	1	1	1	0	1	1	4	0	0	0	deep caries	0	0	1	0	SSC	36	0	2022-04-08	chronic periapical periodontitis	I	-	-	-	-	-	-	-	chronic periapical periodontitis		2.5	0
190	80	F	5.64384	2013-12-14	2019-8-5	85	1	1	1	1	1	1	1	1	5	0	0	0	deep caries	0	0	1	0	SSC	30	1		-				-	-	-	-	-			2.5	0
191	81	M	4.97534	2014-8-30	2019-8-20	54	0	0	1	1	1	1	1	1	5	0	0	0	secondary deep caries	0	0	1	0	SSC	30	1		-				-	-	-	-	-			2.5	0
192	81	M	4.97534	2014-8-30	2019-8-20	75	1	1	1	1	1	1	1	1	5	0	0	0	deep caries	0	0	1	0	SSC	30	1		-				-	-	-	-	-			2.5	0
193	81	M	4.97534	2014-8-30	2019-8-20	85	1	1	1	1	1	1	1	1	5	0	0	0	deep caries	0	0	1	0	SSC	30	1		-				-	-	-	-	-			2.5	0
194	82	F	4.57534	2015-1-30	2019-8-27	65	0	1	0	1	1	1	1	1	4	0	0	0	deep caries	0	0	7	0	SSC	30	1		-				-	-	-	-	pulp canal obliteration			2.5	0
195	82	F	4.57534	2015-1-30	2019-8-27	54	0	0	1	1	1	0	1	1	4	0	0	0	deep caries	0	0	7	0	SSC	30	1		-				-	-	-	-	-			2.5	0
196	82	F	4.57534	2015-1-30	2019-8-27	74	1	0	1	1	1	1	1	1	5	0	0	0	deep caries	0	0	7	0	SSC	30	1		-				-	-	-	-	-			2.5	0
197	82	F	4.57534	2015-1-30	2019-8-27	85	1	1	1	1	0	1	1	1	4	0	0	0	deep caries	0	0	7	0	SSC	30	1		-				-	-	-	-	-			2.5	0
198	83	F	4.81644	2014-11-9	2019-9-2	65	0	1	1	1	1	1	1	1	5	0	0	0	deep caries	0	0	7	0	SSC	30	1					-	-	-	-	-	-			2.5	0
199	83	F	4.81644	2014-11-9	2019-9-2	74	1	0	1	1	1	1	1	1	5	0	0	0	deep caries	0	0	7	0	SSC	30	1		-				-	-	-	-	-			2.5	0
200	83	F	4.81644	2014-11-9	2019-9-2	75	1	1	1	1	1	1	1	1	5	0	0	0	deep caries	0	0	7	0	SSC	30	1		-				-	-	-	-	-			2.5	0
201	83	F	4.81644	2014-11-9	2019-9-2	85	1	1	1	1	1	1	1	1	5	0	0	0	deep caries	0	0	7	0	SSC	30	1		-				-	-	-	-	-			2.5	0
202	84	M	4.63836	2015-1-28	2019-9-17	74	1	0	1	1	0	0	1	1	3	0	0	0	deep caries	0	0	7	0	SSC	30	1		-				-	-	-	-	-			2.5	0
203	84	M	4.63836	2015-1-28	2019-9-17	75	1	1	1	1	0	0	1	1	3	0	0	0	deep caries	0	0	7	0	SSC	30	1		-				-	-	-	-	pulp canal obliteration			2.5	0
204	84	M	4.63836	2015-1-28	2019-9-17	85	1	1	1	0	0	0	1	1	2	0	0	0	deep caries	0	0	7	0	SSC	30	1		-				-	-	-	-	-			2.5	0
205	85	F	4.64658	2015-3-15	2019-11-5	75	1	1	1	0	0	1	1	1	3	0	0	0	deep caries	0	0	4	0	SSC	30	0		-				-	-	-	-	III°external root resorption			2.5	0
206	85	F	4.64658	2015-3-15	2019-11-5	84	1	0	1	1	1	1	1	1	5	0	0	0	deep caries	0	0	4	0	SSC	30	1		-				-	-	-	-	-			2.5	0
207	85	F	4.64658	2015-3-15	2019-11-5	85	1	1	1	0	0	1	1	1	3	0	0	0	deep caries	0	0	4	0	SSC	30	1		-				-	-	-	-	-			2.5	0
208	86	M	3.42192	2016-7-1	2019-12-2	85	1	1	1	0	1	1	1	1	4	0	0	0	deep caries	0	0	7	0	SSC	30	1		-				-	-	-	-	-			2.5	0
209	87	F	4.04658	2015-3-1	2019-3-17	74	1	0	1	1	0	1	1	1	4	0	0	0	deep caries	0	0	4	0	SSC	30	1		-				-	-	-	-	-			2.5	0
210	87	F	4.04658	2015-3-1	2019-3-17	75	1	1	1	1	0	1	1	1	4	0	0	0	deep caries	0	0	4	0	SSC	30	1		-				-	-	-	-	-			2.5	0
211	87	F	4.04658	2015-3-1	2019-3-17	84	1	0	1	1	0	1	1	1	4	0	0	0	deep caries	0	0	4	0	SSC	30	1		-				-	-	-	-	-			2.5	0
212	87	F	4.04658	2015-3-1	2019-3-17	85	1	1	1	1	0	1	1	1	4	0	0	0	deep caries	0	0	4	0	SSC	30	1		-				-	-	-	-	-			2.5	0
213	88	F	4.30137	2015-1-3	2019-4-21	74	1	0	0	1	1	1	1	1	4	0	0	0	deep caries	0	0	1	0	SSC	30	1		-				-	-	-	-	-			2.5	0
214	89	M	5.29315	2014-2-10	2019-5-26	54	0	0	1	1	1	1	1	1	5	0	0	0	deep caries	0	0	7	0	SSC	30	1		-				-	-	-	-	-			2.5	0
215	89	M	5.29315	2014-2-10	2019-5-26	65	0	1	1	0	1	1	1	1	4	0	0	0	deep caries	0	0	7	0	SSC	30	1		-				-	-	-	-	-			2.5	0
216	90	M	3.83836	2015-8-7	2019-6-8	54	0	0	1	0	0	0	1	1	2	0	0	0	deep caries	0	0	4	0	SSC	18	0	2021-01-22	chronic periapical periodontitis	I	-	pustules	-	-			chronic periapical periodontitis			2.5	0
217	90	M	3.83836	2015-8-7	2019-6-8	74	1	0	0	1	1	1	1	1	4	0	0	0	deep caries	0	0	4	0	SSC	30	1		-				-	-	-	-	-			2.5	0
218	90	M	3.83836	2015-8-7	2019-6-8	75	1	1	0	1	1	1	1	1	4	0	0	0	deep caries	0	0	4	0	SSC	30	1		-				-	-	-	-	-			2.5	0
219	90	M	3.83836	2015-8-7	2019-6-8	84	1	0	0	1	0	0	1	1	2	0	0	0	deep caries	0	0	4	0	SSC	30	1		-				-	-	-	-	-			2.5	0
220	90	M	3.83836	2015-8-7	2019-6-8	85	1	1	1	0	0	1	1	1	3	0	0	0	deep caries	0	0	4	0	SSC	30	1		-				-	-	-	-	-			2.5	0
221	91	M	3.19726	2016-8-9	2019-10-19	84	1	0	0	0	0	1	1	1	2	0	0	0	deep caries	0	0	2	0	SSC	42	1	2022-07-26	chronic periapical periodontitis	II	+	-	-	-	-	-	-			2.5	0
222	92	F	6.87397	2012-12-7	2019-10-20	54	0	0	0	1	1	0	1	1	3	0	0	0	deep caries	0	0	1	0	SSC	30	1		-				-	-	-	-	-			2.5	1
223	93	M	4.81096	2014-5-17	2019-3-8	74	1	0	1	1	1	1	1	1	5	0	0	0	deep caries	0	0	2	0	SSC	30	1		-				-	-	-	-	pulp canal obliteration			2.5	0
224	93	M	4.81096	2014-5-17	2019-3-8	84	1	0	1	1	1	1	1	1	5	0	0	0	deep caries	0	0	2	0	SSC	30	1		-				-	-	-	-	pulp canal obliteration			2.5	0
225	94	F	4.09315	2015-2-4	2019-3-9	54	0	0	1	1	1	0	1	1	4	0	0	0	deep caries	0	0	1	0	SSC	30	1		-				-	-	-	-	-			2.5	0
226	94	F	4.09315	2015-2-4	2019-3-9	64	0	0	1	1	1	0	1	1	4	0	0	0	deep caries	0	0	1	0	SSC	30	1		-				-	-	-	-	-			2.5	0
227	94	F	4.09315	2015-2-4	2019-3-9	74	1	0	1	1	1	0	1	1	4	0	0	0	deep caries	0	0	1	0	SSC	30	1		-				-	-	-	-	-			2.5	0
228	95	F	4.44932	2014-10-10	2019-3-22	75	1	1	0	0	0	0	1	0	1	0	0	0	deep caries	0	0	2	0	SSC	30	1		-				-	-	-	-	-			2.5	0
229	96	F	7.05479	2012-4-15	2019-5-3	55	0	1	0	0	0	1	1	1	2	0	0	0	secondary deep caries	0	0	7	0	SSC	30	1		-				-	-	-	-	-			2.5	0
230	96	F	7.05479	2012-4-15	2019-5-3	65	0	1	0	0	0	1	1	1	2	0	0	0	secondary deep caries	0	0	7	0	SSC	30	1		-				-	-	-	-	-			2.5	0
231	96	F	7.05479	2012-4-15	2019-5-3	74	1	0	0	0	0	0	1	0	1	0	0	0	secondary deep caries	0	0	7	0	SSC	30	1		-				-	-	-	-	-			2.5	0
232	96	F	7.05479	2012-4-15	2019-5-3	75	1	1	0	0	0	0	1	0	1	0	0	0	secondary deep caries	0	0	7	0	SSC	30	1		-				-	-	-	-	-			2.5	0
233	96	F	7.05479	2012-4-15	2019-5-3	84	1	0	0	1	0	0	1	1	2	0	0	0	secondary deep caries	0	0	7	0	SSC	30	1		-				-	-	-	-	-			2.5	0
234	97	F	3.90959	2015-6-14	2019-5-11	54	0	0	0	0	0	0	1	0	1	0	0	0	deep caries	0	0	7	0	SSC	30	1		-				-	-	-	-	-			2.5	0
235	97	F	3.90959	2015-6-14	2019-5-11	55	0	1	0	0	1	1	1	1	3	0	0	0	deep caries	0	0	7	0	SSC	30	1		-				-	-	-	-	-			2.5	0
236	97	F	3.90959	2015-6-14	2019-5-11	65	0	1	0	1	1	0	1	1	3	0	0	0	deep caries	0	0	7	0	SSC	30	1		-				-	-	-	-	-			2.5	0
237	97	F	3.90959	2015-6-14	2019-5-11	74	1	0	0	0	0	0	1	0	1	0	0	0	deep caries	0	0	7	0	SSC	30	1		-				-	-	-	-	-			2.5	0
238	97	F	3.90959	2015-6-14	2019-5-11	85	1	1	0	0	1	0	1	1	2	0	0	0	deep caries	0	0	7	0	SSC	30	1		-				-	-	-	-	-			2.5	0
239	98	M	5.58082	2013-10-26	2019-5-24	55	0	1	1	0	0	0	1	1	2	0	0	0	deep caries	0	0	1	0	SSC	30	1		-				-	-	-	-	-			2.5	0
240	99	F	3.5726	2015-11-12	2019-6-8	74	1	0	0	1	1	1	1	1	4	0	0	0	deep caries	0	0	3	0	SSC	30	1		-				-	-	-	-	-			2.5	0
241	100	F	5.59178	2013-11-26	2019-6-28	84	1	0	1	1	1	1	1	1	5	0	0	0	deep caries	0	0	3	0	SSC	30	1		-				-	-	-	-	-			2.5	0
242	101	F	4.33699	2015-3-27	2019-7-27	65	0	1	1	0	0	0	1	1	2	0	0	0	chronic reversible pulpitis	0	0	3	0	SSC	30	1		-				-	-	-	-	-			2.5	0
243	102	M	5.22192	2014-8-13	2019-11-1	85	1	1	1	0	1	0	1	1	3	0	0	0	deep caries	0	0	7	0	SSC	30	1		-				-	-	-	-	-			2.5	0
244	103	F	6.46849	2012-10-10	2019-3-28	64	0	0	1	1	1	0	1	1	4	0	0	0	deep caries	0	0	3	0	SSC	30	1	2021-11-15	Retained deciduous teeth	II	-	-	-	-	-	-	Retained deciduous teeth			2.5	0
245	104	M	3.78356	2015-7-8	2019-4-19	54	0	0	0	1	1	1	1	1	4	0	0	0	deep caries	0	0	7	0	SSC	30	1		-				-	-	-	-	-			2.5	0
246	105	F	5.66027	2013-9-20	2019-5-18	74	1	0	1	1	1	0	1	1	4	0	0	0	deep caries	0	0	7	0	SSC	6	0		-				I°root furcation shadow；II°external root resorption（distal root）			pulp canal obliteration				2.5	0
247	106	M	5.39726	2014-1-7	2019-5-31	74	1	0	0	0	1	0	1	1	2	0	0	0	deep caries	0	0	3	0	SSC	24	0		-				-	-	-	internal root resorption	internal root resorption			2.5	0
248	106	M	5.39726	2014-1-7	2019-5-31	75	1	1	0	0	1	0	1	1	2	0	0	0	deep caries	0	0	3	0	SSC	24	0		-				-	-	-	II°external root resorption(distal root)，pulp canal obliteration（mesial root）	II°external root resorption(distal root)，pulp canal obliteration（mesial root）			2.5	0
249	106	M	5.39726	2014-1-7	2019-5-31	84	1	0	1	1	1	0	1	1	4	0	0	0	deep caries	0	0	3	0	SSC	30	1		-				-	-	-	-	-			2.5	0
250	106	M	5.39726	2014-1-7	2019-5-31	85	1	1	0	0	1	0	1	1	2	0	0	0	deep caries	0	0	3	0	SSC	30	1		-				-	-	-	-	-			2.5	0
251	107	F	5.06301	2014-5-24	2019-6-15	55	0	1	1	0	0	0	1	1	2	0	0	0	deep caries	0	0	7	0	SSC	30	1		-				-	-	-	-	-			2.5	0
252	107	F	5.06301	2014-5-24	2019-6-15	65	0	1	0	0	1	0	1	1	2	0	0	0	deep caries	0	0	7	0	SSC	30	1		-				pulp canal obliteration	pulp canal obliteration	pulp canal obliteration	pulp canal obliteration	pulp canal obliteration			2.5	0
253	107	F	5.06301	2014-5-24	2019-6-15	74	1	0	1	1	1	1	1	1	5	0	0	0	deep caries	0	0	7	0	SSC	30	1		-				-	-	-	-	-			2.5	0
254	107	F	5.06301	2014-5-24	2019-6-15	75	1	1	1	1	1	1	1	1	5	0	0	0	deep caries	0	0	7	0	SSC	30	1		-				-	-	-	-	-			2.5	0
255	108	F	5.74795	2013-9-28	2019-6-27	65	0	1	1	0	0	1	1	1	3	0	0	0	deep caries	0	0	3	0	SSC	30	1		-				pulp canal obliteration	pulp canal obliteration	pulp canal obliteration	pulp canal obliteration	pulp canal obliteration			2.5	0
256	109	M	5.30959	2014-3-9	2019-6-29	84	1	0	1	1	0	1	1	1	4	0	0	0	deep caries	0	0	2	0	SSC	30	1		-				-	pulp canal obliteration	pulp canal obliteration	pulp canal obliteration	pulp canal obliteration			2.5	0
257	110	M	4.94521	2014-8-1	2019-7-11	74	1	0	1	1	1	1	1	1	5	0	0	0	deep caries	0	0	7	0	SSC	30	1		-				-	-	-	-	-			2.5	0
258	110	M	4.94521	2014-8-1	2019-7-11	75	1	1	1	1	1	1	1	1	5	0	0	0	deep caries	0	0	7	0	SSC	30	1		-				-	-	-	-	-			2.5	0
259	110	M	4.94521	2014-8-1	2019-7-11	84	1	0	1	1	1	1	1	1	5	0	0	0	deep caries	0	0	7	0	SSC	30	1		-				-	-	-	-	-			2.5	0
260	110	M	4.94521	2014-8-1	2019-7-11	85	1	1	1	1	1	1	1	1	5	0	0	0	deep caries	0	0	7	0	SSC	30	1		-				-	-	-	-	-			2.5	0
261	111	F	3.89863	2015-9-1	2019-7-25	54	0	0	0	1	0	0	1	1	2	0	0	0	deep caries	0	0	3	0	SSC	30	1		-				-	-	-	-	-			2.5	0
262	111	F	3.89863	2015-9-1	2019-7-25	64	0	0	0	1	0	0	1	1	2	0	0	0	deep caries	0	0	3	0	SSC	30	1		-				-	-	-	-	-			2.5	0
263	111	F	3.89863	2015-9-1	2019-7-25	65	0	1	0	0	0	1	1	1	2	0	0	0	deep caries	0	0	3	0	SSC	30	1		-				-	-	-	-	-			2.5	0
264	112	M	5.19178	2014-6-8	2019-8-16	55	0	1	1	1	0	0	0	1	2	0	0	0	deep caries	0	0	1	0	SSC	24	0					-	-	-	-	II°external root resorption	II°external root resorption			2.5	0
265	112	M	5.19178	2014-6-8	2019-8-16	75	1	1	1	0	0	1	1	1	3	0	0	0	deep caries	0	0	1	0	SSC	24	0					-	-	-	internal root resorption	internal root resorption	I°root furcation shadow；internal root resorption			2.5	0
266	113	M	3.64384	2016-3-26	2019-11-15	84	1	0	0	0	0	0	1	0	1	0	0	0	deep caries	0	0	5	0	SSC	30	1		-				-	-	-	-	-			2.5	0
267	114	F	5.93699	2013-12-10	2019-11-16	55	0	1	0	0	0	1	1	1	2	0	0	0	deep caries	0	0	2	0	SSC	30	1		-				-	-	-	-	-			2.5	0
268	115	M	4.53973	2015-5-24	2019-12-6	75	1	1	1	0	0	0	1	1	2	0	0	0	deep caries	0	0	5	0	SSC	30	0	2021-08-25	chronic periapical periodontitis	I	-	gingival hollow	-	I°root furcation shadow	I°root furcation shadow	I°root furcation shadow	III°external root resorption，III°root furcation shadow			2.5	0
269	116	F	3.50685	2016-6-12	2019-12-13	65	0	1	0	1	1	1	1	1	4	0	0	0	deep caries	0	0	1	0	SSC	30	1		-				-	-	-	-	-			2.5	0
270	116	F	3.50685	2016-6-12	2019-12-13	75	1	1	1	1	1	1	1	1	5	0	0	0	chronic reversible pulpitis	0	0	1	0	SSC	30	1		-				-	-	-	-	-			2.5	0
271	116	F	3.50685	2016-6-12	2019-12-13	85	1	1	1	1	1	1	1	1	5	0	0	0	chronic reversible pulpitis	0	0	1	0	SSC	30	1		-				-	-	-	-	-			2.5	0
272	117	M	5.65205	2014-4-21	2019-12-14	64	0	0	1	1	0	0	1	1	3	0	0	0	deep caries	0	0	5	0	SSC	30	1		-				-	-	-	-	-			2.5	1
273	118	F	4.43014	2015-5-21	2019-10-24	54	0	0	0	1	1	0	1	1	3	0	0	0	deep caries	0	0	7	0	SSC	30	1		-				-	-	-	-	-			2.5	0
274	118	F	4.43014	2015-5-21	2019-10-24	64	0	0	0	1	1	0	1	1	3	0	0	0	deep caries	0	0	7	0	SSC	30	1		-				-	-	-	-	-			2.5	0
275	118	F	4.43014	2015-5-21	2019-10-24	74	1	0	0	0	0	0	1	0	1	0	0	0	deep caries	0	0	7	0	SSC	30	1		-				-	-	-	-	-			2.5	0
276	119	M	4.06301	2015-2-10	2019-3-4	75	1	1	1	0	0	0	1	1	2	0	0	0	deep caries	0	0	1	0	SSC	36	1		-				-	-	-	-	-	-		3	0
277	120	F	4.83836	2014-5-17	2019-3-18	55	0	1	1	0	1	1	1	1	4	0	0	0	deep caries	0	0	1	0	SSC	42	1	2022-07-08	chronic periapical periodontitis	I	-	-	-	-	-	-	-	-		3	0
278	120	F	4.83836	2014-5-17	2019-3-18	75	1	1	1	1	1	1	1	1	5	0	0	0	deep caries	0	0	1	0	SSC	24	0	2021-05-22	chronic periapical periodontitis	0	+	-	-	-	-	II°external root resorption；II°root furcation shadow	II°external root resorption；II°root furcation shadow	II°external root resorption；II°root furcation shadow		3	0
279	120	F	4.83836	2014-5-17	2019-3-18	84	1	0	0	1	0	1	1	1	3	0	0	0	deep caries	0	1	1	0	SSC	36	0	2020-06-04	chronic periapical periodontitis	II	-	redness and swelling	-	-	II°root furcation shadow	III°root furcation shadow	III°root furcation shadow	III°external root resorption		3	0
280	121	M	5.81096	2013-9-23	2019-7-15	55	0	1	1	0	0	1	1	1	3	0	0	0	deep caries	0	0	7	0	SSC	36	1		-				-	-	-	-	-	-		3	0
281	122	F	3.97534	2015-8-1	2019-7-22	85	1	1	0	0	1	0	1	1	2	0	0	0	deep caries	0	0	7	0	SSC	36	1	2022-12-06	Retained deciduous teeth	II	-	-	-	-	-	-	-	-		3	0
282	123	M	4.34247	2015-4-4	2019-8-6	74	1	0	0	1	1	0	1	1	3	0	0	0	chronic reversible pulpitis	0	0	4	0	SSC	6	0	2020-04-30	chronic periapical periodontitis	I	-	-	II°root furcation shadow；II°periapical shadow							3	0
283	124	M	3.45205	2016-2-23	2019-8-6	54	0	0	0	1	0	0	1	1	2	0	0	0	deep caries	0	0	7	0	SSC	36	1		-				-	-	-	-	-	-		3	0
284	124	M	3.45205	2016-2-23	2019-8-6	64	0	0	1	1	1	0	1	1	4	0	0	0	deep caries	0	0	7	0	SSC	36	1		-				-	-	-	-	-	-		3	0
285	125	F	3.70959	2016-3-25	2019-12-9	64	0	0	1	1	0	0	1	1	3	0	0	0	deep caries	0	0	4	0	SSC	36	1		-				-	-	-	-	-	-		3	0
286	125	F	3.70959	2016-3-25	2019-12-9	65	0	1	1	1	0	0	1	1	3	0	0	0	deep caries	0	0	4	0	SSC	36	1		-				-	-	-	-	-	-		3	0
287	126	M	2.76712	2017-3-4	2019-12-9	54	0	0	1	1	1	1	1	1	5	0	0	0	deep caries	0	0	7	0	SSC	36	1		-				-	-	-	-	-	-		3	0
288	126	M	2.76712	2017-3-4	2019-12-9	74	1	0	0	1	1	0	1	1	3	0	0	0	deep caries	0	0	7	0	SSC	36	1		-				-	-	-	-	-	-		3	0
289	126	M	2.76712	2017-3-4	2019-12-9	84	1	0	1	1	1	1	1	1	5	0	0	0	deep caries	0	0	7	0	SSC	36	1		-				-	-	-	-	-	-		3	0
290	127	F	3.59726	2016-5-12	2019-12-16	64	0	0	1	1	1	0	0	1	3	0	0	0	deep caries	0	0	1	0	SSC	36	1		-				-	-	-	-	-	-		3	0
291	128	M	4.52055	2015-6-18	2019-12-24	54	0	0	1	1	0	1	1	1	4	0	0	0	deep caries	0	0	7	0	SSC	42	1	2023-03-17	chronic periapical periodontitis	I	-	-	-	-	-	-	-	-		3	0
292	128	M	4.52055	2015-6-18	2019-12-24	65	0	1	1	0	0	1	1	1	3	0	0	0	deep caries	0	0	7	0	SSC	36	1		-				-	-	-	-	-	-		3	0
293	129	M	3.65205	2016-5-7	2019-12-31	54	0	0	1	1	1	1	1	1	5	0	0	0	deep caries	0	0	7	0	SSC	36	1		-				-	-	-	-	-	-		3	0
294	129	M	3.65205	2016-5-7	2019-12-31	74	1	0	1	1	1	1	1	1	5	0	0	0	deep caries	0	0	7	0	SSC	36	1		-				-	-	-	-	-	-		3	0
295	129	M	3.65205	2016-5-7	2019-12-31	84	1	0	1	1	1	1	1	1	5	0	0	0	deep caries	0	0	7	0	SSC	36	1		-				-	-	-	-	-	-		3	0
296	130	F	5.61644	2013-6-18	2019-1-28	64	0	0	1	1	0	0	1	1	3	0	0	0	deep caries	0	0	7	0	SSC	36	1		-				-	-	-	-	-	-		3	1
297	130	F	5.61644	2013-6-18	2019-1-28	65	0	1	1	0	0	1	1	1	3	0	0	0	deep caries	0	0	7	0	SSC	36	1		-				-	-	-	-	-	-		3	1
298	130	F	5.61644	2013-6-18	2019-1-28	84	1	0	1	1	1	1	1	1	5	0	0	0	deep caries	0	0	7	0	SSC	36	1		-				-	-	-	-	-	-		3	1
299	131	F	2.74521	2016-6-25	2019-3-23	54	0	0	0	0	0	1	1	1	2	0	0	0	deep caries	0	0	7	0	SSC	36	1		-				-	-	-	-	-	-		3	0
300	131	F	2.74521	2016-6-25	2019-3-23	64	0	0	0	1	1	1	1	1	4	0	0	0	deep caries	0	0	7	0	SSC	36	1		-				-	-	-	-	-	-		3	0
301	131	F	2.74521	2016-6-25	2019-3-23	74	1	0	0	1	1	0	1	1	3	0	0	0	deep caries	0	0	7	0	SSC	36	1		-				-	-	-	-	-	-		3	0
302	132	F	4.83014	2014-9-15	2019-7-13	65	0	1	1	0	0	0	1	1	2	0	0	0	deep caries	0	0	7	0	SSC	36	1		-				-	-	-	-	-	-		3	0
303	132	F	4.83014	2014-9-15	2019-7-13	74	1	0	1	0	0	0	1	1	2	0	0	0	deep caries	0	0	7	0	SSC	36	1		-				-	-	-	-	-	-		3	0
304	132	F	4.83014	2014-9-15	2019-7-13	75	1	1	0	0	1	0	1	1	2	0	0	0	deep caries	0	0	7	0	SSC	36	1		-				-	-	-	-	-	-		3	0
305	132	F	4.83014	2014-9-15	2019-7-13	84	1	0	0	1	0	0	1	1	2	0	0	0	deep caries	0	0	7	0	SSC	36	1		-				-	-	-	-	-	-		3	0
306	133	M	5.33699	2014-4-12	2019-8-11	85	1	1	1	1	1	1	1	1	5	0	0	0	deep caries	0	0	2	0	SSC	36	1		-				-	-	-	-	-	-		3	0
307	134	M	6.08767	2013-11-1	2019-12-1	64	0	0	0	1	0	0	1	1	2	0	0	0	deep caries	0	0	1	0	SSC	36	1		-				-	-	-	-	-	-		3	0
308	135	F	4.81918	2015-2-13	2019-12-7	55	0	1	0	0	0	0	1	0	1	0	0	0	deep caries	0	0	7	0	SSC	36	1		-				-	-	-	-	-	-		3	0
309	135	F	4.81918	2015-2-13	2019-12-7	64	0	0	0	1	0	0	1	1	2	0	0	0	deep caries	0	0	7	0	SSC	36	1		-				-	-	-	-	-	-		3	0
310	135	F	4.81918	2015-2-13	2019-12-7	65	0	1	1	0	1	0	1	1	3	0	0	0	deep caries	0	0	7	0	SSC	36	1		-				-	-	-	-	-	-		3	0
311	135	F	4.81918	2015-2-13	2019-12-7	75	1	1	1	1	1	1	1	1	5	0	0	0	deep caries	0	0	7	0	SSC	24	0	2021-10-08	chronic reversible pulpitis	I	-	pustules	-	-	II°external root resorption			-		3	0
312	135	F	4.81918	2015-2-13	2019-12-7	84	1	0	1	1	1	1	1	1	5	0	0	0	deep caries	0	0	7	0	SSC	42	1	2023-01-25	chronic periapical periodontitis	II	-	-	-	-	-	-	-	-		3	0
313	135	F	4.81918	2015-2-13	2019-12-7	85	1	1	1	1	1	1	1	1	5	0	0	0	deep caries	0	0	7	0	SSC	42	1	2023-01-25	chronic periapical periodontitis	II	-	redness and swelling	-	-	-	-	-	-		3	0
314	136	F	5.49315	2014-6-27	2019-12-22	54	0	0	1	1	0	0	1	1	3	0	0	0	deep caries	0	0	7	0	SSC	36	1		-				-	-	-	-	-	-		3	1
315	136	F	5.49315	2014-6-27	2019-12-22	64	0	0	1	1	1	1	1	1	5	0	0	0	deep caries	0	0	7	0	SSC	36	1		-				-	-	-	-	-	-		3	1
316	136	F	5.49315	2014-6-27	2019-12-22	65	0	1	1	0	1	1	1	1	4	0	0	0	deep caries	0	0	7	0	SSC	36	1		-				-	-	-	-	-	-		3	1
317	137	F	4.20274	2015-10-16	2019-12-28	54	0	0	1	1	1	1	0	1	4	0	0	0	deep caries	0	0	7	0	SSC	36	1		-				-	-	-	-	-	-		3	0
318	137	F	4.20274	2015-10-16	2019-12-28	64	0	0	0	0	1	0	1	1	2	0	0	0	deep caries	0	0	7	0	SSC	36	1		-				-	-	-	-	-	-		3	0
319	138	F	5.35068	2013-9-7	2019-1-11	54	0	0	1	1	1	1	1	1	5	0	0	0	deep caries	0	0	1	0	SSC	36	1		-				-	-	-	-	-	-		3	0
320	138	F	5.35068	2013-9-7	2019-1-11	85	1	1	1	1	1	1	1	1	5	0	0	0	deep caries	0	0	1	0	SSC	36	1		-				-	-	-	-	-	-		3	0
321	139	M	4.33151	2014-9-14	2019-1-12	74	1	0	1	1	1	1	1	1	5	0	0	0	deep caries	0	0	7	0	SSC	36	1		-				-	-	-	-	-	-		3	0
322	139	M	4.33151	2014-9-14	2019-1-12	75	1	1	1	1	1	1	1	1	5	0	0	0	deep caries	0	0	7	0	SSC	36	1		-				-	-	-	-	-	-		3	0
323	139	M	4.33151	2014-9-14	2019-1-12	84	1	0	1	1	1	1	1	1	5	0	0	0	deep caries	0	0	7	0	SSC	36	1		-				-	-	-	-	-	-		3	0
324	139	M	4.33151	2014-9-14	2019-1-12	85	1	1	1	1	1	1	1	1	5	0	0	0	deep caries	0	0	7	0	SSC	36	1		-				-	-	-	-	-	-		3	0
325	140	F	4.30959	2014-10-27	2019-2-16	54	0	0	1	1	1	0	1	1	4	0	0	0	deep caries	0	0	1	0	SSC	24	0		-				-	-	-	II°external root resorption；III°root furcation shadow				3	0
326	140	F	4.30959	2014-10-27	2019-2-16	64	0	0	1	1	1	0	1	1	4	0	0	0	deep caries	0	0	1	0	SSC	24	0		-				-	-	-	II°external root resorption；II°root furcation shadow				3	0
327	141	F	4.66849	2014-6-25	2019-2-23	54	0	0	0	1	1	1	1	1	4	0	0	0	deep caries	0	0	7	0	SSC	36	1		-				-	-	-	-	-	-		3	0
328	141	F	4.66849	2014-6-25	2019-2-23	64	0	0	0	1	1	0	1	1	3	0	0	0	deep caries	0	0	7	0	SSC	36	1		-				-	-	-	-	-	-		3	0
329	141	F	4.66849	2014-6-25	2019-2-23	65	0	1	1	0	0	1	1	1	3	0	0	0	deep caries	0	0	7	0	SSC	36	1		-				-	-	-	-	-	-		3	0
330	141	F	4.66849	2014-6-25	2019-2-23	74	1	0	1	1	0	0	1	1	3	0	0	0	deep caries	0	0	7	0	SSC	36	1		-				-	-	-	-	-	-		3	0
331	141	F	4.66849	2014-6-25	2019-2-23	75	1	1	1	0	1	1	1	1	4	0	0	0	deep caries	0	0	7	0	SSC	36	1		-				-	-	-	-	-	-		3	0
332	141	F	4.66849	2014-6-25	2019-2-23	84	1	0	1	1	1	1	1	1	5	0	0	0	deep caries	0	0	7	0	SSC	36	1		-				-	-	-	-	-	-		3	0
333	141	F	4.66849	2014-6-25	2019-2-23	85	1	1	1	0	0	1	1	1	3	0	0	0	deep caries	0	0	7	0	SSC	36	1		-				-	-	-	-	-	-		3	0
334	142	F	7.10137	2012-2-23	2019-3-30	74	1	0	1	1	0	0	1	1	3	0	0	0	deep caries	0	0	3	0	SSC	36	1		-				-	-	-	-	-	-		3	1
335	142	F	7.10137	2012-2-23	2019-3-30	84	1	0	1	1	0	0	1	1	3	0	0	0	deep caries	0	0	3	0	SSC	36	1		-				-	-	-	-	-	-		3	1
336	143	F	4.3589	2014-11-27	2019-4-6	55	0	1	1	0	1	0	1	1	3	0	0	0	deep caries	0	0	7	0	SSC	36	1		-				-	-	-	-	-	-		3	0
337	143	F	4.3589	2014-11-27	2019-4-6	64	0	0	0	1	0	0	1	1	2	0	0	0	deep caries	0	0	7	0	SSC	36	1		-				-	-	-	-	-	-		3	0
338	143	F	4.3589	2014-11-27	2019-4-6	65	0	1	1	1	1	1	1	1	5	0	0	0	deep caries	0	0	7	0	SSC	36	1		-				-	-	-	-	-	-		3	0
339	143	F	4.3589	2014-11-27	2019-4-6	85	1	1	1	0	1	0	1	1	3	0	0	0	deep caries	0	0	7	0	SSC	36	1		-				-	-	-	-	-	-		3	0
340	144	M	5.34521	2013-12-9	2019-4-12	55	0	1	1	1	0	1	1	1	4	0	0	0	chronic reversible pulpitis	0	0	2	0	SSC	36	1		-				-	-	-	-	-	-		3	0
341	144	M	5.34521	2013-12-9	2019-4-12	65	0	1	1	1	0	1	1	1	4	0	0	0	deep caries	0	0	2	0	SSC	36	1		-				-	-	-	-	-	-		3	0
342	144	M	5.34521	2013-12-9	2019-4-12	84	1	0	1	1	1	1	1	1	5	0	0	0	deep caries	0	0	2	0	SSC	36	1		-				-	-	-	-	-	-		3	0
343	144	M	5.34521	2013-12-9	2019-4-12	85	1	1	1	1	1	1	1	1	5	0	0	0	deep caries	0	0	2	0	SSC	36	1		-				-	-	-	-	-	-		3	0
344	145	M	4.39178	2014-11-29	2019-4-20	75	1	1	1	0	0	1	1	1	3	0	0	0	deep caries	0	0	1	0	SSC	36	1		-				-	-	-	-	-	-		3	0
345	145	M	4.39178	2014-11-29	2019-4-20	84	1	0	0	1	0	0	1	1	2	0	0	0	deep caries	0	0	1	0	SSC	36	1		-				-	-	-	-	-	-		3	0
346	146	F	4.13699	2015-3-2	2019-4-20	54	0	0	1	0	1	1	1	1	4	0	0	0	deep caries	0	0	2	0	SSC	36	1		-				-	-	-	-	-	-		3	0
347	146	F	4.13699	2015-3-2	2019-4-20	64	0	0	1	1	0	0	1	1	3	0	0	0	deep caries	0	0	2	0	SSC	36	1		-				-	-	-	-	-	-		3	0
348	147	M	4.4	2014-12-30	2019-5-24	74	1	0	0	1	0	1	1	1	3	0	0	0	deep caries	0	0	3	0	SSC	24	0	2021-07-19	chronic periapical periodontitis	I	+	pustules	-	-	-	chronic periapical periodontitis		-		3	0
349	147	M	4.4	2014-12-30	2019-5-24	75	1	1	1	0	1	1	1	1	4	0	0	0	deep caries	0	0	3	0	SSC	36	1		-				-	-	-	-	-	-		3	0
350	147	M	4.4	2014-12-30	2019-5-24	85	1	1	1	0	1	1	1	1	4	0	0	0	deep caries	0	0	3	0	SSC	36	1		-				-	-	-	-	-	-		3	0
351	148	F	5.04384	2014-5-30	2019-6-14	54	0	0	1	1	1	1	1	1	5	0	0	0	deep caries	0	0	1	0	SSC	30	1		-				-	-	-	-	-	-		3	1
352	148	F	5.04384	2014-5-30	2019-6-14	75	1	1	1	0	1	1	1	1	4	0	0	0	deep caries	0	0	1	0	SSC	36	1		-				-	-	-	-	-	-		3	0
353	149	M	3.85479	2015-8-8	2019-6-15	54	0	0	1	0	1	0	1	1	3	0	0	0	deep caries	0	0	7	0	SSC	36	1		-				-	-	-	-	-	-		3	0
354	149	M	3.85479	2015-8-8	2019-6-15	64	0	0	1	1	0	0	1	1	3	0	0	0	deep caries	0	0	7	0	SSC	36	1		-				-	-	-	-	-	-		3	0
355	149	M	3.85479	2015-8-8	2019-6-15	74	1	0	1	0	0	0	1	1	2	0	0	0	deep caries	0	0	7	0	SSC	36	1		-				-	-	-	-	-	-		3	0
356	149	M	3.85479	2015-8-8	2019-6-15	75	1	1	1	0	1	0	1	1	3	0	0	0	deep caries	0	0	7	0	SSC	36	1		-				-	-	-	-	-	-		3	0
357	149	M	3.85479	2015-8-8	2019-6-15	84	1	0	1	1	0	0	1	1	3	0	0	0	deep caries	0	0	7	0	SSC	36	1		-				-	-	-	-	-	-		3	0
358	149	M	3.85479	2015-8-8	2019-6-15	85	1	1	0	1	0	0	1	1	2	0	0	0	deep caries	0	0	7	0	SSC	36	1		-				-	-	-	-	-	pulp canal obliteration		3	0
359	150	M	5.42466	2014-1-26	2019-6-28	54	0	0	0	1	1	1	1	1	4	0	0	0	deep caries	0	0	7	0	SSC	36	1		-				-	-	-	-	-	-		3	0
360	150	M	5.42466	2014-1-26	2019-6-28	55	0	1	0	1	0	1	1	1	3	0	0	0	deep caries	0	0	7	0	SSC	36	1		-				-	-	-	-	-	-		3	0
361	150	M	5.42466	2014-1-26	2019-6-28	64	0	0	0	1	1	0	1	1	3	0	0	0	deep caries	0	0	7	0	SSC	36	1		-				-	-	-	-	-	-		3	0
362	150	M	5.42466	2014-1-26	2019-6-28	65	0	1	1	0	0	0	1	1	2	0	0	0	deep caries	0	0	7	0	SSC	36	1		-				-	-	-	-	-	-		3	0
363	150	M	5.42466	2014-1-26	2019-6-28	84	1	0	0	1	0	1	1	1	3	0	0	0	secondary deep caries	0	0	7	0	SSC	36	1		-				-	-	-	-	-	-		3	0
364	150	M	5.42466	2014-1-26	2019-6-28	85	1	1	1	1	0	0	1	1	3	0	0	0	secondary deep caries	0	0	7	0	SSC	36	1		-				-	-	-	-	-	-		3	0
365	151	M	4.62466	2014-12-11	2019-7-26	54	0	0	1	1	1	1	1	1	5	0	0	0	deep caries	0	0	7	0	SSC	36	1		-				-	-	-	-	-	-		3	0
366	151	M	4.62466	2014-12-11	2019-7-26	55	0	1	1	0	1	1	1	1	4	0	0	0	deep caries	0	0	7	0	SSC	36	1		-				-	-	-	-	-	-		3	0
367	151	M	4.62466	2014-12-11	2019-7-26	84	1	0	1	1	1	1	1	1	5	0	0	0	deep caries	0	0	7	0	SSC	36	1		-				-	-	-	-	-	-		3	0
368	151	M	4.62466	2014-12-11	2019-7-26	85	1	1	1	1	1	1	1	1	5	0	0	0	deep caries	0	0	7	0	SSC	36	1		-				-	-	-	-	-	-		3	0
369	152	M	3.93973	2015-9-9	2019-8-17	75	1	1	1	0	0	0	1	1	2	0	0	0	deep caries	0	0	7	0	SSC	36	1		-				-	-	-	-	-	-		3	0
370	153	F	5.01644	2014-8-18	2019-8-23	55	0	1	1	0	0	1	1	1	3	0	0	0	deep caries	0	0	3	0	SSC	36	0	2022-06-18	chronic periapical periodontitis	I	-	pustules	-	-	-	-	-	chronic periapical periodontitis		3	0
371	153	F	5.01644	2014-8-18	2019-8-23	74	1	0	0	1	1	1	1	1	4	0	0	0	deep caries	0	0	3	0	SSC	36	0	2022-06-18	chronic periapical periodontitis	I	-	pustules	-	-	-	-	-	chronic periapical periodontitis		3	0
372	154	F	3.70411	2015-12-18	2019-8-31	55	0	1	0	1	0	1	1	1	3	0	0	0	deep caries	0	0	4	0	SSC	36	1		-				-	-	-	-	-	-		3	0
373	154	F	3.70411	2015-12-18	2019-8-31	64	0	0	1	1	0	0	1	1	3	0	0	0	deep caries	0	0	4	0	SSC	36	1		-				-	-	-	-	-	-		3	0
374	154	F	3.70411	2015-12-18	2019-8-31	84	1	0	1	1	0	0	1	1	3	0	0	0	deep caries	0	0	4	0	SSC	36	1		-				-	-	-	-	-	-		3	0
375	154	F	3.70411	2015-12-18	2019-8-31	85	1	1	0	1	0	1	1	1	3	0	0	0	deep caries	0	0	4	0	SSC	36	1		-				-	-	-	-	-	-		3	0
376	155	F	6.98904	2012-9-12	2019-9-6	75	1	1	1	0	1	0	1	1	3	0	0	0	deep caries	0	0	7	0	SSC	36	1		-				-	-	-	-	-	-		3	1
377	155	F	6.98904	2012-9-12	2019-9-6	84	1	0	0	1	0	0	1	1	2	0	0	0	secondary deep caries	0	0	7	0	SSC	36	1		-				-	-	-	-	-	-		3	1
378	155	F	6.98904	2012-9-12	2019-9-6	85	1	1	1	0	0	0	1	1	2	0	0	0	secondary deep caries	0	0	7	0	SSC	36	1		-				-	-	-	-	-	-		3	1
379	156	M	4.44384	2015-4-19	2019-9-27	74	1	0	0	1	1	1	1	1	4	0	0	0	deep caries	0	0	7	0	SSC	36	1		-				-	-	-	-	-	-		3	0
380	156	M	4.44384	2015-4-19	2019-9-27	84	1	0	0	0	0	0	1	0	1	0	0	0	deep caries	0	0	7	0	SSC	36	1		-				-	-	-	-	-	-		3	0
381	157	M	4.00822	2015-9-26	2019-9-28	64	0	0	1	1	0	0	1	1	3	0	0	0	deep caries	0	0	3	0	SSC	42	1	2023-07-13	chronic periapical periodontitis	0	-	pulp polyp	-	-	-	-	-	-		3	0
382	157	M	4.00822	2015-9-26	2019-9-28	75	1	1	1	0	1	0	1	1	3	0	0	0	deep caries	0	0	3	0	SSC	36	1		-				-	-	-	-	-	-		3	0
383	157	M	4.00822	2015-9-26	2019-9-28	84	1	0	1	1	0	0	1	1	3	0	0	0	deep caries	0	0	3	0	SSC	36	1		-				-	-	-	-	-	-		3	0
384	157	M	4.00822	2015-9-26	2019-9-28	85	1	1	1	0	0	0	1	1	2	0	0	0	deep caries	0	0	3	0	SSC	36	1		-				-	-	-	-	-	-		3	0
385	158	M	7.04658	2012-10-3	2019-10-18	55	0	1	1	0	0	1	1	1	3	0	0	0	deep caries	0	0	3	0	SSC	36	1		-				-	-	-	-	-	-		3	0
386	158	M	7.04658	2012-10-3	2019-10-18	65	0	1	1	0	0	1	1	1	3	0	0	0	deep caries	0	0	3	0	SSC	36	1		-				-	-	-	-	-	-		3	0
387	159	F	5.12603	2014-9-18	2019-11-2	54	0	0	0	1	1	1	1	1	4	0	0	0	deep caries	0	0	1	0	SSC	24	0	2021-11-22	chronic periapical periodontitis	0	-	-	-	-	-	III°root furcation shadow	II°root furcation shadow	II°root furcation shadow		3	0
388	159	F	5.12603	2014-9-18	2019-11-2	64	0	0	1	1	1	0	1	1	4	0	0	0	deep caries	0	0	1	0	SSC	24	0	2021-11-22	chronic periapical periodontitis	0	-	-	-	-	-	II°root furcation shadow	II°root furcation shadow	II°root furcation shadow		3	0
389	160	M	3.81918	2016-2-18	2019-12-13	75	1	1	0	0	0	1	1	1	2	0	0	0	deep caries	0	0	1	0	SSC	36	1		-				-	-	-	-	-	-		3	0
390	161	F	3.39178	2015-9-5	2019-1-25	54	0	0	0	1	0	1	1	1	3	0	0	0	deep caries	0	0	3	0	SSC	36	1		-				-	-	-	pulp canal obliteration	pulp canal obliteration	pulp canal obliteration		3	0
391	162	M	4.01096	2015-3-26	2019-3-29	64	0	0	1	1	1	0	1	1	4	0	0	0	deep caries	0	0	3	0	SSC	36	1		-				-	-	-	-	-	-		3	0
392	162	M	4.01096	2015-3-26	2019-3-29	74	1	0	0	1	1	0	1	1	3	0	0	0	deep caries	0	0	3	0	SSC	24	0		-				-	calcified root canal	calcified root canal	internal root resorption(mesial root)	internal root resorption(mesial root)，calcified root canal(distal root)	internal root resorption(mesial root)，pulp canal obliteration(distal root)		3	0
393	163	F	6.09041	2013-3-3	2019-4-4	85	1	1	1	1	1	1	1	1	5	0	0	0	chronic reversible pulpitis	0	0	3	0	SSC	36	1		-				-	-	-	-	-	-		3	0
394	164	F	5.85205	2013-6-6	2019-4-12	65	0	1	1	1	1	1	1	1	5	0	0	0	deep caries	0	0	1	0	SSC	36	1		-				-	calcified root canal	calcified root canal	calcified root canal	calcified root canal	calcified root canal		3	0
395	165	M	2.68493	2016-8-6	2019-4-12	75	1	1	0	0	1	0	1	1	2	0	0	0	deep caries	0	0	3	0	SSC	36	1		-				-	-	-	-	-	-		3	0
396	165	M	2.68493	2016-8-6	2019-4-12	84	1	0	0	0	0	0	1	0	1	0	0	0	deep caries	0	0	3	0	SSC	36	1		-				-	-	-	-	-	-		3	0
397	166	M	5.7863	2013-7-6	2019-4-18	55	0	1	0	0	0	1	1	1	2	0	0	0	deep caries	0	0	3	0	SSC	12	0		-				-	external root resorption(mesial root)，pulp canal obliteration(palatal root)	external root resorption(mesial root)，pulp canal obliteration(palatal root)	external root resorption(mesial root)，pulp canal obliteration(palatal root)	external root resorption(mesial root)，pulp canal obliteration(palatal root)	III°external root resorption		3	0
398	167	F	4.62466	2014-9-3	2019-4-18	54	0	0	1	1	1	0	1	1	4	0	0	0	deep caries	0	0	7	0	SSC	36	1		-				-	-	-	pulp canal obliteration	pulp canal obliteration	pulp canal obliteration		3	0
399	168	F	5.04658	2014-4-3	2019-4-19	74	1	0	0	1	0	0	1	1	2	0	0	0	deep caries	0	0	3	0	SSC	30	0	2022-07-12	chronic periapical periodontitis	I	±	peripyema	I°root furcation shadow	I°root furcation shadow	-	-	-	III°root furcation shadow；II°external root resorption(mesial root)，III°external root resorption(distal root)		3	0
400	168	F	5.04658	2014-4-3	2019-4-19	85	1	1	1	0	0	0	1	1	2	0	0	0	deep caries	0	0	3	0	SSC	36	1		-				-	-	-	-	-	-		3	0
401	169	M	4.59452	2014-9-16	2019-4-20	74	1	0	0	1	0	1	1	1	3	0	0	0	deep caries	0	0	7	0	SSC	36	1		-				-	-	-	calcified root canal	calcified root canal	pulp canal obliteration		3	0
402	169	M	4.59452	2014-9-16	2019-4-20	75	1	1	1	0	0	1	1	1	3	0	0	0	deep caries	0	0	7	0	SSC	36	1		-				-	-	-	calcified root canal	calcified root canal	pulp canal obliteration		3	0
403	169	M	4.59452	2014-9-16	2019-4-20	84	1	0	0	1	0	0	1	1	2	0	0	0	deep caries	0	0	7	0	SSC	12	0		-				-	II°external root resorption，I°root furcation shadow	II°external root resorption，I°root furcation shadow	II°external root resorption(distal root)，pulp canal obliteration	II°external root resorption(distal root)，pulp canal obliteration	II°external root resorption(distal root)，pulp canal obliteration		3	0
404	169	M	4.59452	2014-9-16	2019-4-20	85	1	1	1	0	0	1	1	1	3	0	0	0	deep caries	0	0	7	0	SSC	36	1		-				-	-	-	calcified root canal	calcified root canal	pulp canal obliteration		3	0
405	170	F	4.41644	2014-12-10	2019-5-10	55	0	1	0	0	0	0	1	0	1	0	0	0	deep caries	0	0	3	0	SSC	36	1		-				-	-	-	-	-	pulp canal obliteration		3	0
406	171	F	3.17534	2016-3-9	2019-5-11	64	0	0	0	0	1	0	1	1	2	0	0	0	deep caries	0	0	3	0	SSC	36	1		-				-	-	-	-	-	-		3	0
407	171	F	3.17534	2016-3-9	2019-5-11	75	1	1	0	0	1	0	1	1	2	0	0	0	deep caries	0	0	3	0	SSC	36	1		-				-	-	-	-	-	-		3	0
408	171	F	3.17534	2016-3-9	2019-5-11	84	1	0	1	1	1	1	1	1	5	0	0	0	deep caries	0	0	3	0	SSC	36	0		-				-	-	-	-	-	II°root furcation shadow		3	0
409	171	F	3.17534	2016-3-9	2019-5-11	85	1	1	0	0	0	0	1	0	1	0	0	0	deep caries	0	0	3	0	SSC	36	1		-				-	-	-	-	-	pulp canal obliteration（mesial root），calcified root canal（distal root）		3	0
410	172	F	3.28219	2016-2-3	2019-5-16	64	0	0	1	1	1	0	1	1	4	0	0	0	deep caries	0	0	7	0	SSC	36	1		-				-	-	-	-	-	-		3	0
411	172	F	3.28219	2016-2-3	2019-5-16	84	1	0	1	1	1	0	1	1	4	0	0	0	deep caries	0	0	7	0	SSC	36	1		-				-	-	-	pulp canal obliteration	pulp canal obliteration	pulp canal obliteration		3	0
412	173	F	2.72603	2016-8-27	2019-5-18	74	1	0	1	1	1	1	1	1	5	0	0	0	deep caries	0	0	3	0	SSC	36	1		-				-	I°root furcation shadow	I°root furcation shadow	I°root furcation shadow	I°root furcation shadow	I°root furcation shadow		3	0
413	174	F	4.1589	2015-4-3	2019-5-30	74	1	0	0	0	0	0	1	0	1	0	0	0	deep caries	0	0	3	0	SSC	36	1		-				-	-	pulp canal obliteration	pulp canal obliteration	pulp canal obliteration	pulp canal obliteration		3	0
414	174	F	4.1589	2015-4-3	2019-5-30	84	1	0	0	0	0	0	1	0	1	0	0	0	deep caries	0	0	3	0	SSC	36	1		-				-	-	pulp canal obliteration	pulp canal obliteration	pulp canal obliteration	pulp canal obliteration		3	0
415	175	M	3.94795	2015-7-17	2019-6-27	54	0	0	1	1	0	0	1	1	3	0	0	0	deep caries	0	0	3	0	SSC	36	1		-				-	-	-	-	-	-		3	0
416	175	M	3.94795	2015-7-17	2019-6-27	64	0	0	1	1	1	1	1	1	5	0	0	0	deep caries	0	0	3	0	SSC	36	1		-				-	-	-	pulp canal obliteration	pulp canal obliteration	pulp canal obliteration		3	0
417	176	F	5.50959	2014-1-2	2019-7-6	55	0	1	1	1	1	1	1	1	5	0	0	0	deep caries	1	0	7	0	SSC	36	1		-				-	-	-	-	-	-		3	0
418	176	F	5.50959	2014-1-2	2019-7-6	64	0	0	1	1	1	1	1	1	5	0	0	0	deep caries	1	0	7	0	SSC	36	1		-				-	-	-	-	-	-		3	0
419	176	F	5.50959	2014-1-2	2019-7-6	65	0	1	1	1	1	1	1	1	5	0	0	0	deep caries	1	0	7	0	SSC	36	1		-				-	-	-	-	-	-		3	0
420	176	F	5.50959	2014-1-2	2019-7-6	74	1	0	1	1	1	1	1	1	5	0	0	0	deep caries	0	0	7	0	SSC	36	1		-				-	-	-	-	-	pulp canal obliteration		3	0
421	176	F	5.50959	2014-1-2	2019-7-6	75	1	1	1	1	1	1	1	1	5	0	0	0	deep caries	0	0	7	0	SSC	36	1		-				-	-	-	-	-	-		3	0
422	176	F	5.50959	2014-1-2	2019-7-6	84	1	0	1	1	1	1	1	1	5	0	0	0	deep caries	0	0	7	0	SSC	36	1		-				-	-	-	-	-	pulp canal obliteration		3	0
423	176	F	5.50959	2014-1-2	2019-7-6	85	1	1	1	1	1	1	1	1	5	0	0	0	deep caries	0	0	7	0	SSC	36	1		-				-	-	-	-	-	-		3	0
424	177	M	4.80822	2014-10-11	2019-8-1	54	0	0	0	1	0	0	1	1	2	0	0	0	deep caries	0	0	3	0	SSC	36	1		-				-	-	-	-	-	-		3	0
425	177	M	4.80822	2014-10-11	2019-8-1	65	0	1	1	1	1	1	1	1	5	0	0	0	deep caries	0	0	3	0	SSC	36	1		-				-	-	-	-	-	-		3	0
426	178	M	4.63836	2015-3-6	2019-10-24	54	0	0	1	1	0	0	1	1	3	0	0	0	deep caries	0	0	3	0	SSC	36	0	2022-09-06	chronic periapical periodontitis	I	±	pustules	-	-	-	-	-	chronic periapical periodontitis		3	0
427	178	M	4.63836	2015-3-6	2019-10-24	55	0	1	1	0	0	0	1	1	2	0	0	0	deep caries	0	0	3	0	SSC	12	0	2020-05-06	chronic periapical periodontitis	0	±	pustules	-	chronic periapical periodontitis						3	0
428	178	M	4.63836	2015-3-6	2019-10-24	64	0	0	1	1	0	0	1	1	3	0	0	0	deep caries	0	0	3	0	SSC	36	1		-				-	-	-	-	-	-		3	0
429	179	M	4.44658	2015-5-22	2019-10-31	55	0	1	1	0	0	0	1	1	2	0	0	0	deep caries	0	0	3	0	SSC	36	1		-				-	-	-	-	-	-		3	0
430	179	M	4.44658	2015-5-22	2019-10-31	84	1	0	0	1	0	0	1	1	2	0	0	0	deep caries	0	0	3	0	SSC	36	1		-				-	-	I°root furcation shadow	I°root furcation shadow	I°root furcation shadow	I°root furcation shadow		3	0
431	179	M	4.44658	2015-5-22	2019-10-31	85	1	1	1	0	0	0	1	1	2	0	0	0	deep caries	0	0	3	0	SSC	36	1		-				-	-	-	-	-	-		3	0
432	180	F	2.67671	2016-10-23	2019-6-27	54	0	0	1	1	1	0	1	1	4	0	0	0	deep caries	0	0	1	0	SSC	36	1		-				-	-	-	-	-	-		3	0
433	180	F	2.67671	2016-10-23	2019-6-27	64	0	0	1	1	1	0	1	1	4	0	0	0	deep caries	0	0	1	0	SSC	36	1		-				-	-	-	-	-	-		3	0
434	180	F	2.67671	2016-10-23	2019-6-27	74	1	0	0	1	0	0	1	1	2	0	0	0	deep caries	0	0	1	0	SSC	36	1		-				-	-	-	-	-	-		3	0
435	180	F	2.67671	2016-10-23	2019-6-27	84	1	0	0	1	0	0	1	1	2	0	0	0	deep caries	0	0	1	0	SSC	36	1		-				-	-	-	-	-	-		3	0
436	181	F	3.59178	2015-11-30	2019-7-3	65	0	1	0	0	1	0	1	1	2	0	0	0	deep caries	0	0	3	0	SSC	36	1		-				-	-	-	-	-	-		3	0
437	182	F	3.26575	2016-4-11	2019-7-17	75	1	1	0	0	1	1	1	1	3	0	0	0	deep caries	0	0	4	0	SSC	36	1		-				-	-	-	-	-	-		3	0
438	183	F	8.59452	2011-1-12	2019-8-15	55	0	1	1	1	1	1	1	1	5	0	0	0	deep caries	0	0	1	0	SSC	36	1		-				-	-	-	-	-	-		3	1
439	183	F	8.59452	2011-1-12	2019-8-15	65	0	1	1	1	1	1	1	1	5	0	0	0	deep caries	0	0	1	0	SSC	12	0	2020-08-14	chronic periapical periodontitis	0	-	pustules	-	chronic periapical periodontitis				-		3	0
440	183	F	8.59452	2011-1-12	2019-8-15	85	1	1	1	1	1	1	1	1	5	0	0	0	deep caries	0	0	1	0	SSC	36	1		-				-	-	-	-	-	-		3	1
441	184	M	6.80274	2013-1-5	2019-10-24	54	0	0	1	1	1	0	1	1	4	0	0	0	deep caries	0	0	7	0	SSC	36	1		-				-	-	-	-	-	-		3	0
442	184	M	6.80274	2013-1-5	2019-10-24	64	0	0	1	1	1	0	1	1	4	0	0	0	deep caries	0	0	7	0	SSC	36	1		-				-	-	-	-	-	-		3	0
443	184	M	6.80274	2013-1-5	2019-10-24	74	1	0	0	1	0	0	1	1	2	0	0	0	deep caries	0	0	7	0	SSC	36	1		-				-	-	-	-	-	-		3	0
444	184	M	6.80274	2013-1-5	2019-10-24	75	1	1	1	0	0	0	1	1	2	0	0	0	deep caries	0	0	7	0	SSC	36	1		-				-	-	-	-	-	-		3	0
445	184	M	6.80274	2013-1-5	2019-10-24	85	1	1	1	0	0	0	1	1	2	0	0	0	deep caries	0	0	7	0	SSC	36	1	2020-11-14	pericoronitis	0	-	redness and swelling	-	-	pericoronitis					3	0
446	185	M	4.18904	2015-8-25	2019-11-1	74	1	0	0	1	0	0	1	1	2	0	0	0	deep caries	0	0	5	0	SSC	36	1		-				-	-	-	-	-	-		3	0
447	185	M	4.18904	2015-8-25	2019-11-1	84	1	0	0	1	0	0	1	1	2	0	0	0	deep caries	0	0	5	0	SSC	36	1		-				-	-	-	-	-	-		3	0
448	185	M	4.18904	2015-8-25	2019-11-1	85	1	1	1	0	1	1	1	1	4	0	0	0	deep caries	0	0	5	0	SSC	36	1		-				-	-	-	-	-	-		3	0
449	186	M	3.25479	2016-9-21	2019-12-23	75	1	1	1	0	1	0	1	1	3	0	0	0	deep caries	0	0	1	0	SSC	42	1	2022-08-14	chronic periapical periodontitis	I	-	pustules	-	-	-	-	pulp canal obliteration	pulp canal obliteration	pulp canal obliteration	3.5	0
450	187	M	4.2274	2015-2-27	2019-5-19	74	1	0	1	1	0	0	1	1	3	0	0	0	deep caries	0	0	7	0	SSC	42	0		-				-	-	-	-	-	-	internal root resorption	3.5	0
451	187	M	4.2274	2015-2-27	2019-5-19	84	1	0	1	1	0	0	1	1	3	0	0	0	deep caries	0	0	7	0	SSC	42	0		-				-	-	-	-	-	-	II°external root resorption；II°root furcation shadow	3.5	0
452	188	M	4.53973	2014-12-2	2019-6-15	84	1	0	0	1	0	0	1	1	2	0	0	0	deep caries	0	0	1	0	SSC	42	0	2022-11-18	chronic periapical periodontitis	I	-	-	-	-	-	-	-	-	internal root resorption，chronic periapical periodontitis	3.5	0
453	189	M	4.50411	2015-5-3	2019-11-2	84	1	0	0	1	0	0	1	1	2	0	0	0	deep caries	0	0	2	0	SSC	36	0	2022-12-11	chronic periapical periodontitis	0	-	redness and swelling	-	-	-	-	-	chronic periapical periodontitis		3.5	0
454	190	F	5.25205	2013-10-6	2019-1-4	54	0	0	1	0	0	0	1	1	2	0	0	0	secondary deep caries	0	0	1	0	SSC	42	1		-				-	-	-	-	-	-	-	3.5	0
455	190	F	5.25205	2013-10-6	2019-1-4	55	0	1	1	0	0	0	1	1	2	0	0	0	deep caries	0	0	1	0	SSC	42	1	2022-05-26	deep caries after pulpotomy	0	-	-	-	-	-	-	-	-	-	3.5	0
456	191	F	3.80822	2015-3-31	2019-1-19	64	0	0	1	1	1	0	1	1	4	0	0	0	deep caries	0	0	7	0	SSC	42	1		-				-	-	-	-	-	-	-	3.5	0
457	192	F	5.94247	2013-3-10	2019-2-15	65	0	1	1	1	1	1	1	1	5	0	0	0	deep caries	0	0	2	0	SSC	42	1		-				-	-	-	-	-	-	-	3.5	1
458	193	M	3.9589	2015-3-24	2019-3-8	74	1	0	0	1	1	1	1	1	4	0	0	0	chronic reversible pulpitis	0	0	1	0	SSC	42	1		-				-	-	-	-	-	-	-	3.5	0
459	194	M	3.7589	2015-6-12	2019-3-15	54	0	0	1	1	1	1	1	1	5	0	0	0	deep caries	0	0	1	0	SSC	42	1		-				-	-	-	-	-	-	-	3.5	0
460	194	M	3.7589	2015-6-12	2019-3-15	64	0	0	1	1	1	1	1	1	5	0	0	0	deep caries	0	0	1	0	SSC	42	1		-				-	-	-	-	-	-	-	3.5	0
461	194	M	3.7589	2015-6-12	2019-3-15	74	1	0	1	1	1	1	1	1	5	0	I	0	deep caries	0	0	1	0	SSC	42	1		-				-	-	-	-	-	-	-	3.5	0
462	194	M	3.7589	2015-6-12	2019-3-15	75	1	1	1	1	1	1	1	1	5	0	0	0	deep caries	0	0	1	0	SSC	42	1		-				-	-	-	-	-	-	-	3.5	0
463	194	M	3.7589	2015-6-12	2019-3-15	84	1	0	1	1	1	1	1	1	5	0	0	0	deep caries	0	0	1	0	SSC	42	1		-				-	-	-	-	-	-	-	3.5	0
464	194	M	3.7589	2015-6-12	2019-3-15	85	1	1	1	1	1	1	1	1	5	0	0	0	deep caries	0	0	1	0	SSC	42	1		-				-	-	-	-	-	-	-	3.5	0
465	195	M	5.10137	2014-2-16	2019-3-23	84	1	0	1	0	0	0	1	1	2	0	0	0	deep caries	0	0	1	0	SSC	42	1		-				-	-	-	-	-	-	-	3.5	0
466	195	M	5.10137	2014-2-16	2019-3-23	85	1	1	1	1	1	1	1	1	5	0	0	0	chronic reversible pulpitis	0	0	1	0	SSC	42	1		-				-	-	-	-	-	-	-	3.5	0
467	196	M	4.67123	2014-9-15	2019-5-17	54	0	0	0	1	1	1	1	1	4	0	0	0	deep caries	0	0	1	0	SSC	42	1		-				-	-	-	-	-	-	-	3.5	0
468	197	F	5.35342	2014-1-17	2019-5-24	55	0	1	1	0	0	1	1	1	3	0	0	0	deep caries	0	0	7	0	SSC	42	1		-				-	-	-	-	-	-	-	3.5	1
469	198	M	7.52603	2012-1-17	2019-7-26	84	1	0	1	1	1	1	1	1	5	0	0	0	deep caries	0	0	1	0	SSC	42	1		-				-	-	-	-	-	-	-	3.5	1
470	199	M	4.00548	2015-8-22	2019-8-23	64	0	0	1	1	1	1	1	1	5	0	0	0	deep caries	0	0	7	0	SSC	42	1		-				-	-	-	-	-	-	-	3.5	0
471	199	M	4.00548	2015-8-22	2019-8-23	74	1	0	1	1	1	1	1	1	5	0	0	0	deep caries	0	0	7	0	SSC	42	0	2022-04-12	chronic periapical periodontitis	0	+	pustules	-	-	-	-	-	-	II°root furcation shadow；II°external root resorption；chronic periapical periodontitis	3.5	0
472	199	M	4.00548	2015-8-22	2019-8-23	85	1	1	1	1	1	1	1	1	5	0	0	0	deep caries	0	0	7	0	SSC	42	1		-				-	-	-	-	-	-	-	3.5	0
473	200	F	4.71507	2014-12-28	2019-9-14	64	0	0	0	0	0	0	1	0	1	0	0	0	deep caries	0	0	7	0	SSC	42	1		-				-	-	-	-	-	-	-	3.5	0
474	200	F	4.71507	2014-12-28	2019-9-14	65	0	1	1	0	0	1	1	1	3	0	0	0	deep caries	0	0	7	0	SSC	42	1		-				-	-	-	-	-	-	-	3.5	0
475	200	F	4.71507	2014-12-28	2019-9-14	84	1	0	1	1	1	0	1	1	4	0	0	0	deep caries	0	0	7	0	SSC	42	0		-				-	pulp canal obliteration	pulp canal obliteration	pulp canal obliteration	pulp canal obliteration	pulp canal obliteration	III°external root resorption；II°root furcation shadow	3.5	0
476	201	M	2.15068	2017-9-8	2019-11-1	54	0	0	0	0	0	0	1	0	1	0	0	0	deep caries	0	0	7	0	SSC	42	1		-				-	-	-	-	-	-	-	3.5	0
477	201	M	2.15068	2017-9-8	2019-11-1	64	0	0	0	0	0	0	1	0	1	0	0	0	deep caries	0	0	7	0	SSC	42	1		-				-	-	-	-	-	-	-	3.5	0
478	201	M	2.15068	2017-9-8	2019-11-1	74	1	0	0	0	0	0	1	0	1	0	0	0	deep caries	0	0	7	0	SSC	42	1		-				-	-	-	-	-	-	-	3.5	0
479	202	F	4.28493	2015-9-16	2019-12-28	65	0	1	1	0	0	1	1	1	3	0	0	0	deep caries	0	0	7	0	SSC	42	1		-				-	-	-	-	-	-	-	3.5	0
480	202	F	4.28493	2015-9-16	2019-12-28	84	1	0	0	1	1	0	1	1	3	0	0	0	deep caries	0	0	7	0	SSC	42	1		-				-	-	-	-	-	-	-	3.5	0
481	202	F	4.28493	2015-9-16	2019-12-28	85	1	1	1	1	1	1	1	1	5	0	0	0	deep caries	0	0	7	0	SSC	42	1		-				-	-	-	-	-	-	-	3.5	0
482	203	M	5.66575	2013-5-3	2019-1-1	54颊根	0	0	1	1	0	0	1	1	3	0	0	0	chronic reversible pulpitis	0	0	1	0	SSC	42	1		-				-	-	-	-	-	-	-	3.5	0
483	204	M	2.48767	2016-8-18	2019-2-12	64	0	0	1	0	1	0	1	1	3	0	0	0	deep caries	0	0	1	0	SSC	42	1		-				-	-	-	-	-	-	-	3.5	0
484	205	M	4.63288	2014-9-26	2019-5-14	65	0	1	1	1	0	0	1	1	3	0	0	0	deep caries	0	0	1	0	SSC	42	1		-				-	-	-	-	-	-	-	3.5	1
485	205	M	4.63288	2014-9-26	2019-5-14	74	1	0	1	1	1	1	1	1	5	0	0	0	deep caries	0	0	1	0	SSC	42	1		-				-	-	-	-	-	-	-	3.5	0
486	206	F	4.19178	2015-5-14	2019-7-22	85	1	1	0	0	1	1	1	1	3	0	0	0	deep caries	0	0	1	0	SSC	18	0	2020-10-18	chronic periapical periodontitis	0	+	pustules	-	-	chronic periapical periodontitis					3.5	0
487	207	M	4.34247	2015-4-4	2019-8-6	75	1	1	1	1	1	1	1	1	5	0	0	0	chronic reversible pulpitis	0	0	4	0	SSC	42	1	2023-07-11	Retained deciduous teeth	II	-	-	-	-	-	-	-	-	-	3.5	0
488	208	F	4.28767	2015-4-24	2019-8-6	54	0	0	0	1	0	1	1	1	3	0	0	0	deep caries	0	0	1	0	SSC	30	0	2022-01-22	chronic periapical periodontitis	0	-	pustules	-	-	-	-	chronic periapical periodontitis			3.5	0
489	209	F	4.99726	2014-8-14	2019-8-12	54	0	0	1	1	1	0	1	1	4	0	0	0	deep caries	0	0	7	0	SSC	42	1		-				-	-	-	-	-	-	-	3.5	0
490	209	F	4.99726	2014-8-14	2019-8-12	64	0	0	1	1	0	0	1	1	3	0	0	0	deep caries	0	0	7	0	SSC	42	1		-				-	-	-	-	-	-	-	3.5	0
491	209	F	4.99726	2014-8-14	2019-8-12	65	0	1	1	0	0	0	1	1	2	0	0	0	deep caries	0	0	7	0	SSC	42	1		-				-	-	-	-	-	-	-	3.5	0
492	209	F	4.99726	2014-8-14	2019-8-12	75	1	1	1	1	1	1	1	1	5	0	0	0	deep caries	0	0	7	0	SSC	42	1		-				-	-	-	-	-	-	-	3.5	0
493	210	M	5.83288	2014-1-5	2019-11-4	85	1	1	0	0	1	0	1	1	2	0	0	0	deep caries	0	0	7	0	SSC	42	1		-				-	-	-	-	Dentin bridge	Dentin bridge	Dentin bridge	3.5	0
494	210	M	5.83288	2014-1-5	2019-11-4	54	0	0	1	1	0	0	1	1	3	0	0	0	deep caries	0	0	7	0	SSC	42	1		-				-	-	-	-	-	-	-	3.5	0
495	210	M	5.83288	2014-1-5	2019-11-4	55	0	1	1	0	0	1	1	1	3	0	0	0	deep caries	0	0	7	0	SSC	42	1		-				-	-	-	-	-	-	-	3.5	0
496	210	M	5.83288	2014-1-5	2019-11-4	65	0	1	1	1	0	0	1	1	3	0	0	0	deep caries	0	0	7	0	SSC	42	1		-				-	-	-	-	-	-	-	3.5	0
497	210	M	5.83288	2014-1-5	2019-11-4	84	1	0	1	1	0	1	1	1	4	0	0	0	deep caries	0	0	7	0	SSC	42	1	2023-03-22	Retained deciduous teeth	III	-	-	-	-	-	-	-	-	-	3.5	0
498	211	F	3.35616	2016-8-15	2019-12-23	74	1	0	0	1	0	0	1	1	2	0	0	0	deep caries	0	0	7	0	SSC	24	0	2021-10-16	chronic periapical periodontitis	II	+	bleeding on probing，redness and swelling	-	-	-	widening of periodontal ligament gap	II°root furcation shadow	II°root furcation shadow	II°root furcation shadow	3.5	0
499	211	F	3.35616	2016-8-15	2019-12-23	75	1	1	1	1	1	1	1	1	5	0	0	0	deep caries	0	0	7	0	SSC	42	1		-				-	-	-	-	-	-	-	3.5	0
500	212	M	3.60822	2016-5-22	2019-12-30	64	0	0	0	1	0	0	1	1	2	0	0	0	deep caries	0	0	7	0	SSC	42	1		-				-	-	-	-	-	-	-	3.5	0
501	213	F	3.56712	2015-8-15	2019-3-9	54	0	0	1	1	1	1	1	1	5	0	0	0	deep caries	0	0	7	0	SSC	42	1		-				-	-	-	-	-	-	-	3.5	0
502	213	F	3.56712	2015-8-15	2019-3-9	64	0	0	1	1	1	0	1	1	4	0	0	0	deep caries	0	0	7	0	SSC	42	1		-				-	-	-	-	-	-	-	3.5	0
503	213	F	3.56712	2015-8-15	2019-3-9	74	1	0	1	1	0	0	1	1	3	0	0	0	deep caries	0	0	7	0	SSC	24	0		-				-	-	-	II°external root resorption	II°external root resorption	II°external root resorption	II°external root resorption	3.5	0
504	213	F	3.56712	2015-8-15	2019-3-9	84	1	0	1	1	0	0	1	1	3	0	0	0	deep caries	0	0	7	0	SSC	42	1		-				-	-	-	-	-	-	-	3.5	1
505	214	M	4.48767	2014-10-19	2019-4-13	84	1	0	1	1	0	0	1	1	3	0	0	0	deep caries	0	0	7	0	SSC	42	1		-				-	-	-	-	-	-	-	3.5	0
506	215	F	4.33699	2015-1-3	2019-5-4	54	0	0	1	1	0	1	1	1	4	0	0	0	deep caries	0	0	1	0	SSC	6	0	2019-09-12	chronic periapical periodontitis	0	-	pustules	chronic periapical periodontitis							3.5	0
507	215	F	4.33699	2015-1-3	2019-5-4	74	1	0	1	1	0	1	1	1	4	0	0	0	deep caries	0	0	1	0	SSC	42	1		-				-	-	-	-	-	-	-	3.5	1
508	216	F	3.89315	2015-8-9	2019-6-30	54	0	0	0	1	1	0	1	1	3	0	0	0	deep caries	0	0	2	0	SSC	42	1		-				-	-	-	-	-	-	-	3.5	1
509	216	F	3.89315	2015-8-9	2019-6-30	55	0	1	1	1	1	0	1	1	4	0	0	0	deep caries	0	0	2	0	SSC	42	1		-				-	-	-	-	-	-	-	3.5	0
510	216	F	3.89315	2015-8-9	2019-6-30	74	1	0	0	1	0	0	1	1	2	0	0	0	deep caries	0	0	2	0	SSC	42	1		-				-	-	-	-	-	-	-	3.5	1
511	216	F	3.89315	2015-8-9	2019-6-30	84	1	0	0	1	1	0	1	1	3	0	0	0	deep caries	0	0	2	0	SSC	42	0	2023-01-03	chronic periapical periodontitis	I	-	redness and swelling	-	-	-	-	-	-	chronic periapical periodontitis	3.5	0
512	216	F	3.89315	2015-8-9	2019-6-30	85	1	1	1	0	1	1	1	1	4	0	0	0	deep caries	0	0	2	0	SSC	42	0	2023-01-03	chronic periapical periodontitis	I	-	-	-	-	-	-	-	-	chronic periapical periodontitis	3.5	0
513	217	F	4.73699	2014-12-8	2019-9-1	55	0	1	1	0	0	1	1	1	3	0	0	0	deep caries	0	0	1	0	SSC	42	1		-				-	-	-	-	-	-	-	3.5	0
514	217	F	4.73699	2014-12-8	2019-9-1	74	1	0	0	1	0	0	1	1	2	0	0	0	deep caries	0	0	1	0	SSC	42	1		-				-	-	-	-	-	-	-	3.5	0
515	218	F	5.24932	2014-6-10	2019-9-7	54	0	0	1	1	1	1	1	1	5	0	0	0	secondary deep caries	0	0	1	0	SSC	42	1		-				-	-	-	-	-	-	-	3.5	0
516	218	F	5.24932	2014-6-10	2019-9-7	55	0	1	0	0	0	1	1	1	2	0	0	0	secondary deep caries	0	0	1	0	SSC	42	1	2023-08-31	chronic periapical periodontitis	0	-	-	-	-	-	-	-	-	-	3.5	0
517	218	F	5.24932	2014-6-10	2019-9-7	64	0	0	0	0	0	0	1	0	1	0	0	0	secondary deep caries	0	0	1	0	SSC	24	0	2021-02-13	chronic periapical periodontitis	I	-	pustules	-	-	-	periapical periodontitis				3.5	0
518	218	F	5.24932	2014-6-10	2019-9-7	65	0	1	0	0	1	0	1	1	2	0	0	0	secondary deep caries	0	0	1	0	SSC	36	0	2022-09-11	chronic periapical periodontitis	I	-	-	-	-	-	-	-	periapical periodontitis		3.5	0
519	219	F	5.65479	2014-2-18	2019-10-13	64	0	0	1	1	0	1	1	1	4	0	0	0	deep caries	0	0	1	0	SSC	42	1		-				-	-	-	-	-	-	-	3.5	0
520	219	F	5.65479	2014-2-18	2019-10-13	74	1	0	0	1	0	1	1	1	3	0	0	0	deep caries	0	0	1	0	SSC	42	1	2023-12-08	Retained deciduous teeth	I	-	-	-	-	-	-	-	-	-	3.5	0
521	220	M	6.43288	2012-8-2	2019-1-5	55	0	1	1	0	0	1	1	1	3	0	0	0	deep caries	0	0	7	0	SSC	42	1		-				-	-	-	-	-	-	-	3.5	1
522	221	M	5.64384	2013-7-19	2019-3-9	65	0	1	1	0	1	1	1	1	4	0	0	0	deep caries	0	0	7	0	SSC	42	1		-				-	-	-	-	-	-	-	3.5	0
523	221	M	5.64384	2013-7-19	2019-3-9	84	1	0	0	1	0	0	1	1	2	0	0	0	secondary deep caries	0	0	7	0	SSC	42	1		-				-	-	-	-	-	-	-	3.5	0
524	222	F	4.43014	2014-10-18	2019-3-23	74	1	0	0	1	0	0	1	1	2	0	0	0	deep caries	0	0	3	0	SSC	42	1	2023-03-03	Retained deciduous teeth	II	+	redness and swelling	-	-	-	-	-	-	-	3.5	0
525	222	F	4.43014	2014-10-18	2019-3-23	84	1	0	0	1	0	0	1	1	2	0	0	0	deep caries	0	0	3	0	SSC	42	1		-				-	-	-	-	-	-	-	3.5	0
526	223	M	4.92877	2014-5-9	2019-4-12	55	0	1	1	1	1	1	1	1	5	0	0	0	deep caries	0	0	3	0	SSC	42	1		-				-	-	-	-	-	-	-	3.5	1
527	223	M	4.92877	2014-5-9	2019-4-12	65	0	1	1	0	0	1	1	1	3	0	0	0	deep caries	0	0	3	0	SSC	42	1		-				-	-	-	-	-	-	-	3.5	1
528	223	M	4.92877	2014-5-9	2019-4-12	84	1	0	0	1	1	0	1	1	3	0	0	0	deep caries	0	0	3	0	SSC	42	1		-				-	-	-	-	-	-	-	3.5	1
529	224	F	4.88767	2014-6-15	2019-5-4	55	0	1	0	0	1	1	1	1	3	0	0	0	deep caries	0	0	7	0	SSC	42	1		-				-	-	-	-	-	-	-	3.5	1
530	224	F	4.88767	2014-6-15	2019-5-4	64	0	0	0	1	1	0	1	1	3	0	0	0	deep caries	0	0	7	0	SSC	24	1		-				-	-	-	-	-	-	-	3.5	1
531	224	F	4.88767	2014-6-15	2019-5-4	65	0	1	0	0	1	1	1	1	3	0	0	0	deep caries	0	0	7	0	SSC	42	1		-				-	-	-	-	-	-	-	3.5	1
532	224	F	4.88767	2014-6-15	2019-5-4	74	1	0	0	1	0	0	1	1	2	0	0	0	secondary deep caries	0	0	7	0	SSC	42	1		-				-	-	-	-	-	-	-	3.5	1
533	224	F	4.88767	2014-6-15	2019-5-4	84	1	0	0	1	0	0	1	1	2	0	0	0	secondary deep caries	0	0	7	0	SSC	24	1		-				-	-	-	-	-	-	-	3.5	1
534	225	F	3.89041	2015-6-28	2019-5-18	54	0	0	1	1	1	0	1	1	4	0	0	0	deep caries	0	0	7	0	SSC	42	1		-				-	-	-	-	-	-	-	3.5	0
535	225	F	3.89041	2015-6-28	2019-5-18	64	0	0	1	1	1	0	1	1	4	0	0	0	deep caries	0	0	7	0	SSC	42	1		-				-	-	-	-	-	-	-	3.5	0
536	225	F	3.89041	2015-6-28	2019-5-18	74	1	0	1	1	1	1	1	1	5	0	0	0	deep caries	0	0	7	0	SSC	42	1		-				-	-	-	-	-	-	-	3.5	0
537	225	F	3.89041	2015-6-28	2019-5-18	84	1	0	1	1	1	1	1	1	5	0	0	0	deep caries	0	0	7	0	SSC	42	1		-				-	-	-	-	-	-	-	3.5	0
538	226	M	4.55342	2014-11-18	2019-6-7	55	0	1	0	1	0	0	1	1	2	0	0	0	deep caries	0	0	7	0	SSC	42	1		-				-	-	-	-	-	-	-	3.5	0
539	226	M	4.55342	2014-11-18	2019-6-7	64	0	0	1	1	0	1	1	1	4	redness and swelling	0	0	deep caries	0	0	7	0	SSC	42	1		-				-	-	-	-	-	-	-	3.5	0
540	226	M	4.55342	2014-11-18	2019-6-7	65	0	1	1	0	1	0	1	1	3	redness and swelling	0	0	deep caries	0	0	7	0	SSC	42	1		-				-	-	-	-	-	-	-	3.5	0
541	226	M	4.55342	2014-11-18	2019-6-7	74	1	0	1	1	1	1	1	1	5	redness and swelling	0	0	deep caries	0	0	7	0	SSC	42	1		-				-	-	-	-	-	-	-	3.5	0
542	226	M	4.55342	2014-11-18	2019-6-7	75	1	1	1	1	1	1	1	1	5	redness and swelling	0	0	deep caries	0	0	7	0	SSC	42	1		-				-	pulp canal obliteration	pulp canal obliteration	pulp canal obliteration	pulp canal obliteration	pulp canal obliteration	pulp canal obliteration	3.5	0
543	226	M	4.55342	2014-11-18	2019-6-7	85	1	1	0	0	1	1	1	1	3	0	0	0	deep caries	0	0	7	0	SSC	42	1		-				-	-	-	-	-	-	-	3.5	0
544	227	F	6.27123	2013-3-16	2019-6-21	54	0	0	1	1	1	0	1	1	4	0	0	0	deep caries	0	0	7	0	SSC	42	1		-				-	-	-	-	-	-	-	3.5	0
545	227	F	6.27123	2013-3-16	2019-6-21	64	0	0	1	1	1	0	1	1	4	0	0	0	deep caries	0	0	7	0	SSC	42	1	2023-08-23	chronic periapical periodontitis	II	-	redness and swelling	-	-	-	-	-	-	-	3.5	0
546	227	F	6.27123	2013-3-16	2019-6-21	74	1	0	0	0	0	0	1	0	1	0	0	0	deep caries	0	0	7	0	SSC	42	0	2023-08-23	chronic periapical periodontitis	II	-	fistula closure marks	-	-	-	-	-	-	II°external root resorption,II°root furcation shadow	3.5	0
547	227	F	6.27123	2013-3-16	2019-6-21	84	1	0	0	1	0	0	1	1	2	0	0	0	deep caries	0	0	7	0	SSC	42	1		-				-	-	-	-	-	-	-	3.5	0
548	228	M	5.23288	2014-4-26	2019-7-19	64	0	0	1	1	1	1	1	1	5	0	0	0	chronic reversible pulpitis	0	0	3	0	SSC	42	1		-				-	-	-	-	-	-	-	3.5	0
549	228	M	5.23288	2014-4-26	2019-7-19	75	1	1	1	1	1	1	1	1	5	0	0	0	chronic reversible pulpitis	0	0	3	0	SSC	42	1		-				-	-	-	-	-	-	-	3.5	0
550	229	M	3.76712	2015-10-14	2019-7-20	54	0	0	0	1	1	0	1	1	3	0	0	0	deep caries	0	0	7	0	SSC	42	1		-				-	-	-	-	-	-	-	3.5	0
551	229	M	3.76712	2015-10-14	2019-7-20	74	1	0	1	1	0	0	1	1	3	0	0	0	deep caries	0	0	7	0	SSC	42	1		-				-	-	-	-	-	-	-	3.5	0
552	230	F	4.11507	2015-7-7	2019-8-17	54	0	0	1	1	0	0	1	1	3	0	0	0	deep caries	0	0	4	0	SSC	42	1		-				-	-	-	-	-	-	-	3.5	0
553	230	F	4.11507	2015-7-7	2019-8-17	55	0	1	0	1	1	1	1	1	4	0	0	0	deep caries	0	0	4	0	SSC	42	1		-				-	-	-	-	-	-	-	3.5	0
554	231	F	4.0137	2015-8-26	2019-8-30	65	0	1	0	0	0	1	1	1	2	0	0	0	deep caries	0	0	6	0	SSC	42	1	2023-11-10	chronic periapical periodontitis	I	+	-	-	-	-	-	-	-	-	3.5	0
555	232	M	1.96164	2017-9-30	2019-9-16	54	0	0	1	1	1	1	1	1	5	0	0	0	deep caries	0	0	1	0	SSC	36	0	2022-07-23	chronic periapical periodontitis	0	-	pustules	-	-	-	-	-	chronic periapical periodontitis		3.5	0
556	232	M	1.96164	2017-9-30	2019-9-16	64	0	0	1	1	1	1	1	1	5	0	0	0	deep caries	0	0	1	0	SSC	30	0	2021-12-12	chronic periapical periodontitis	0	-	pustules	-	-	-	-	chronic periapical periodontitis			3.5	0
557	233	M	5.04384	2014-4-6	2019-4-20	55	0	1	1	0	0	1	1	1	3	0	0	0	deep caries	0	0	7	0	SSC	42	1		-				-	-	-	-	-	-	-	3.5	0
558	234	F	5.08219	2014-9-15	2019-10-13	55	0	1	1	0	0	1	1	1	3	0	0	0	deep caries	0	0	2	0	SSC	42	1		-				-	-	-	-	-	-	-	3.5	1
559	235	F	6.87397	2012-12-7	2019-10-20	64	0	0	0	1	0	0	1	1	2	0	0	0	deep caries	0	0	1	0	SSC	42	1		-				-	-	-	-	-	-	-	3.5	1
560	235	F	6.87397	2012-12-7	2019-10-20	84	1	0	0	1	0	0	1	1	2	0	0	0	deep caries	0	0	1	0	SSC	42	1		-				-	-	-	-	-	-	-	3.5	1
561	235	F	6.87397	2012-12-7	2019-10-20	85	1	1	1	0	0	0	1	1	2	0	0	0	deep caries	0	0	1	0	SSC	42	1	2023-01-25	Retained deciduous teeth	I	-	-	-	-	-	-	-	-	-	3.5	0
562	236	F	4.19726	2015-8-10	2019-10-20	54	0	0	0	1	1	1	1	1	4	0	0	0	deep caries	0	0	2	0	SSC	42	1		-				-	-	-	-	-	-	-	3.5	1
563	236	F	4.19726	2015-8-10	2019-10-20	64	0	0	0	1	1	0	1	1	3	0	0	0	deep caries	0	0	2	0	SSC	42	1		-				-	-	-	-	-	-	-	3.5	1
564	237	F	5.76438	2014-2-19	2019-11-23	64	0	0	1	1	1	0	1	1	4	0	0	0	deep caries	0	0	2	0	SSC	42	1		-				-	-	-	-	-	-	-	3.5	0
565	238	F	3.70137	2016-4-11	2019-12-22	54	0	0	1	1	1	1	1	1	5	0	0	0	deep caries	0	0	1	0	SSC	24	0	2020-12-31	chronic periapical periodontitis	II	-	redness and swelling	-	-	II°external root resorption;III°root furcation shadow	II°external root resorption;III°root furcation shadow	II°external root resorption;III°root furcation shadow	chronic periapical periodontitis		3.5	0
566	238	F	3.70137	2016-4-11	2019-12-22	55	0	1	1	0	0	0	1	1	2	0	0	0	deep caries	0	0	1	0	SSC	24	0	2020-12-31	chronic periapical periodontitis	II	-	redness and swelling	-	-	II°external root resorption;III°root furcation shadow	II°external root resorption;III°root furcation shadow	II°external root resorption;III°root furcation shadow	chronic periapical periodontitis		3.5	0
567	238	F	3.70137	2016-4-11	2019-12-22	65	0	1	1	1	0	0	1	1	3	0	0	0	deep caries	0	0	1	0	SSC	42	1		-				-	-	-	-	-	-	-	3.5	0
568	238	F	3.70137	2016-4-11	2019-12-22	84	1	0	0	1	0	0	1	1	2	0	0	0	deep caries	0	0	1	0	SSC	42	1		-				-	-	-	-	-	-	-	3.5	1
569	238	F	3.70137	2016-4-11	2019-12-22	85	1	1	1	0	0	1	1	1	3	0	0	0	deep caries	0	0	1	0	SSC	42	1		-				-	-	-	-	-	-	-	3.5	0
570	239	F	3.64384	2016-5-9	2019-12-29	54	0	0	1	1	1	0	1	1	4	0	0	0	deep caries	0	0	7	0	SSC	42	1		-				-	-	-	-	-	-	-	3.5	0
571	239	F	3.64384	2016-5-9	2019-12-29	64	0	0	1	1	1	0	1	1	4	0	0	0	deep caries	0	0	7	0	SSC	42	1	2023-12-08	chronic periapical periodontitis	II	-	-	-	-	-	-	-	-	-	3.5	0
572	239	F	3.64384	2016-5-9	2019-12-29	75	1	1	0	0	0	0	1	0	1	0	0	0	deep caries	0	0	7	0	SSC	42	1		-				-	-	-	-	-	-	-	3.5	0
573	239	F	3.64384	2016-5-9	2019-12-29	84	1	0	1	0	0	0	1	1	2	0	0	0	deep caries	0	0	7	0	SSC	42	1		-				-	-	-	-	-	-	-	3.5	0
574	240	M	4.65753	2014-8-3	2019-3-30	54	0	0	1	1	1	1	1	1	5	0	0	0	deep caries	0	0	2	0	SSC	42	1		-				-	-	-	-	-	-	-	3.5	1
575	240	M	4.65753	2014-8-3	2019-3-30	55	0	1	1	1	1	1	1	1	5	0	0	0	deep caries	0	0	2	0	SSC	42	1		-				-	-	-	-	-	-	-	3.5	1
576	240	M	4.65753	2014-8-3	2019-3-30	65	0	1	1	1	1	1	1	1	5	0	0	0	deep caries	0	0	2	0	SSC	42	1		-				-	-	-	-	-	-	-	3.5	1
577	241	M	3.47945	2016-5-4	2019-10-25	54	0	0	1	1	1	1	1	1	5	0	0	0	deep caries	0	0	7	0	SSC	42	1		-				-	-	-	-	-	-	-	3.5	0
578	242	F	5.20274	2014-8-15	2019-10-27	55	0	1	1	0	0	1	1	1	3	0	0	0	deep caries	0	0	7	0	SSC	42	1		-				-	-	-	-	-	-	-	3.5	0
579	242	F	5.20274	2014-8-15	2019-10-27	84	1	0	0	1	0	0	1	1	2	0	0	0	deep caries	0	0	7	0	SSC	42	1		-				-	-	-	-	-	-	-	3.5	1
580	242	F	5.20274	2014-8-15	2019-10-27	85	1	1	1	0	1	0	1	1	3	0	0	0	deep caries	0	0	7	0	SSC	42	1	2023-02-02	chronic periapical periodontitis	II	-	pustules	-	-	-	-	-	-	-	3.5	0
581	243	M	4.26849	2015-8-5	2019-11-10	54	0	0	0	1	1	0	1	1	3	0	0	0	deep caries	0	0	4	0	SSC	42	1		-				-	-	-	-	-	-	-	3.5	1
582	243	M	4.26849	2015-8-5	2019-11-10	64	0	0	1	1	0	1	1	1	4	0	0	0	deep caries	0	0	4	0	SSC	42	1		-				-	-	-	-	-	-	-	3.5	1
583	243	M	4.26849	2015-8-5	2019-11-10	65	0	1	1	0	0	0	1	1	2	0	0	0	deep caries	0	0	4	0	SSC	42	1		-				-	-	-	-	-	-	-	3.5	0
584	244	M	6.55616	2013-1-2	2019-7-23	74	1	0	0	1	0	0	1	1	2	0	0	0	deep caries	0	0	7	0	SSC	6	0	2019-11-22	chronic periapical periodontitis	I	-	fistula	chronic periapical periodontitis			pulp canal obliteration				3.5	0
585	245	M	3.88493	2015-2-25	2019-1-13	85	1	1	1	0	0	1	1	1	3	0	0	0	chronic reversible pulpitis	0	0	1	0	SSC	42	1		-				-	-	-	-	-	-	-	3.5	1
586	246	M	3.67397	2015-5-12	2019-1-13	74	1	0	1	1	1	1	1	1	5	0	0	0	deep caries	0	0	7	0	SSC	42	1		-				-	-	-	-	-	-	-	3.5	0
587	246	M	3.67397	2015-5-12	2019-1-13	75	1	1	1	1	1	1	1	1	5	0	0	0	deep caries	0	0	7	0	SSC	24	0	2021-03-05	chronic periapical periodontitis	0	-	-	-	-	-	II°root furcation shadow				3.5	0
588	246	M	3.67397	2015-5-12	2019-1-13	84	1	0	1	1	1	1	1	1	5	0	0	0	deep caries	0	0	7	0	SSC	42	1		-				-	-	-	-	-	-	-	3.5	0
589	246	M	3.67397	2015-5-12	2019-1-13	85	1	1	1	1	1	1	1	1	5	0	0	0	deep caries	0	0	7	0	SSC	42	1		-				-	-	-	-	-	-	-	3.5	0
590	247	F	5.64384	2013-11-9	2019-6-30	55	0	1	1	1	1	1	1	1	5	0	0	0	deep caries	0	0	1	0	SSC	42	1		-				-	-	-	-	-	-	-	3.5	0
591	247	F	5.64384	2013-11-9	2019-6-30	64	0	0	1	0	1	0	1	1	3	0	0	0	secondary deep caries	0	0	1	0	SSC	42	1		-				-	-	-	-	-	-	-	3.5	1
592	248	M	4.49863	2015-2-11	2019-8-10	85	1	1	1	0	1	1	1	1	4	0	0	0	deep caries	0	0	7	0	SSC	42	1		-				-	-	-	-	-	-	-	3.5	0
593	249	M	3.13151	2016-7-16	2019-9-1	54	0	0	1	1	1	1	1	1	5	0	0	0	secondary deep caries	0	0	2	0	SSC	42	1		-				-	-	-	-	-	-	-	3.5	0
594	249	M	3.13151	2016-7-16	2019-9-1	64	0	0	1	1	1	1	1	1	5	0	0	0	deep caries	0	0	2	0	SSC	42	1		-				-	-	-	-	-	-	-	3.5	0
595	249	M	3.13151	2016-7-16	2019-9-1	74	1	0	1	1	1	1	1	1	5	0	0	0	deep caries	0	0	2	0	SSC	42	1		-				-	-	-	-	-	-	-	3.5	0
596	249	M	3.13151	2016-7-16	2019-9-1	84	1	0	1	1	1	1	1	1	5	0	0	0	deep caries	0	0	2	0	SSC	42	1		-				-	-	-	-	-	-	-	3.5	0
597	250	M	4.70959	2014-6-2	2019-2-15	54	0	0	1	0	0	1	1	1	3	0	0	0	deep caries	0	0	1	0	SSC	42	1		-				-	-	-	-	-	-	-	3.5	0
598	250	M	4.70959	2014-6-2	2019-2-15	64	0	0	1	1	0	0	1	1	3	0	0	0	deep caries	0	0	1	0	SSC	42	1		-				-	-	-	-	-	-	-	3.5	0
599	250	M	4.70959	2014-6-2	2019-2-15	74	1	0	0	1	0	0	1	1	2	0	0	0	deep caries	0	0	1	0	SSC	42	1		-				-	-	-	-	-	-	-	3.5	0
600	250	M	4.70959	2014-6-2	2019-2-15	84	1	0	0	1	1	1	1	1	4	0	0	0	deep caries	0	0	1	0	SSC	42	1		-				-	-	-	-	-	-	-	3.5	0
601	251	M	5.06301	2014-3-22	2019-4-13	74	1	0	1	1	1	1	1	1	5	0	0	0	deep caries	0	0	2	0	SSC	42	1		-				-	-	-	-	-	-	-	3.5	0
602	252	M	3.48767	2015-11-28	2019-5-24	54	0	0	0	0	0	0	1	0	1	0	0	0	deep caries	0	0	4	0	SSC	42	1		-				-	-	-	-	-	-	-	3.5	0
603	252	M	3.48767	2015-11-28	2019-5-24	74	1	0	0	1	0	0	1	1	2	0	0	0	deep caries	0	0	4	0	SSC	42	1		-				-	-	-	-	-	-	-	3.5	0
604	252	M	3.48767	2015-11-28	2019-5-24	75	1	1	1	0	1	0	1	1	3	0	0	0	deep caries	0	0	4	0	SSC	42	1		-				-	-	-	-	-	-	-	3.5	0
605	252	M	3.48767	2015-11-28	2019-5-24	84	1	0	1	1	0	0	1	1	3	0	0	0	deep caries	0	0	4	0	SSC	42	1		-				-	-	-	-	-	-	-	3.5	0
606	252	M	3.48767	2015-11-28	2019-5-24	85	1	1	1	0	1	0	1	1	3	0	0	0	deep caries	0	0	4	0	SSC	42	1		-				-	-	-	-	-	-	-	3.5	0
607	253	F	4.76986	2014-8-18	2019-5-25	84	1	0	1	1	1	1	1	1	5	0	0	0	deep caries	0	0	7	0	SSC	42	1		-				-	-	-	pulp canal obliteration		-	-	3.5	1
608	254	F	5.32603	2014-2-24	2019-6-21	55	0	1	1	1	0	1	1	1	4	0	0	0	deep caries	0	0	3	0	SSC	42	1		-				-	-	-	-	-	-	-	3.5	1
609	255	M	4.25205	2015-4-13	2019-7-13	55	0	1	0	0	0	1	1	1	2	0	0	0	deep caries	0	0	4	0	SSC	42	1		-				-	-	-	-	-	-	-	3.5	0
610	255	M	4.25205	2015-4-13	2019-7-13	75	1	1	1	0	0	0	1	1	2	0	0	0	deep caries	0	0	4	0	SSC	42	1		-				-	-	-	-	-	-	-	3.5	0
611	256	F	4.38082	2015-2-25	2019-7-13	64	0	0	1	0	1	0	1	1	3	0	0	0	deep caries	0	0	3	0	SSC	24	0	2021-04-22	chronic periapical periodontitis	0	+	pustules	-	-	-	chronic periapical periodontitis	III°root furcation shadow	-	-	3.5	0
612	256	F	4.38082	2015-2-25	2019-7-13	75	1	1	1	1	1	1	1	1	5	0	0	0	deep caries	0	0	3	0	SSC	42	1	2023-10-21	chronic periapical periodontitis	0	-	-	-	-	-	-	-	-	-	3.5	0
613	256	F	4.38082	2015-2-25	2019-7-13	84	1	0	1	1	1	1	1	1	5	0	0	0	deep caries	0	0	3	0	SSC	42	1		-				-	-	-	-	-	-	-	3.5	0
614	257	M	5.4274	2014-4-26	2019-9-28	54	0	0	1	1	0	0	1	1	3	0	0	0	deep caries	0	0	3	0	SSC	42	1		-				-	-	-	-	-	-	-	3.5	1
615	257	M	5.4274	2014-4-26	2019-9-28	65	0	1	1	1	0	1	1	1	4	0	0	0	deep caries	0	0	3	0	SSC	42	1		-				-	-	-	-	-	-	-	3.5	1
616	257	M	5.4274	2014-4-26	2019-9-28	85	1	1	1	0	0	1	1	1	3	0	0	0	deep caries	0	0	3	0	SSC	42	1		-				-	-	-	-	-	-	-	3.5	0
617	258	F	3.22192	2016-7-11	2019-9-30	74	1	0	0	1	0	0	1	1	2	0	0	0	deep caries	0	0	1	0	SSC	42	1		-				-	-	-	-	-	-	-	3.5	0
618	259	M	4.11507	2015-4-22	2019-6-2	74	1	0	0	1	0	1	1	1	3	0	0	0	deep caries	0	0	7	0	SSC	42	1		-				-	-	-	-	-	-	-	3.5	0
619	259	M	4.11507	2015-4-22	2019-6-2	84	1	0	0	1	0	0	1	1	2	0	0	0	deep caries	0	0	7	0	SSC	42	1		-				-	-	-	-	-	-	-	3.5	0
620	260	F	2.6	2017-4-13	2019-11-17	74	1	0	1	0	0	0	1	1	2	0	0	0	deep caries	0	0	1	0	SSC	42	1		-				-	-	-	-	-	-	-	3.5	0
621	261	F	4.9863	2014-12-28	2019-12-21	54	0	0	1	1	0	1	0	1	3	0	0	0	deep caries	0	0	7	0	SSC	42	1		-				-	-	-	-	-	-	-	3.5	1
622	261	F	4.9863	2014-12-28	2019-12-21	64	0	0	1	1	1	1	1	1	5	0	0	0	deep caries	0	0	7	0	SSC	42	1		-				-	-	-	-	-	-	-	3.5	1
623	261	F	4.9863	2014-12-28	2019-12-21	74	1	0	1	1	1	0	1	1	4	0	0	0	deep caries	0	0	7	0	SSC	42	1		-				-	-	-	-	-	-	-	3.5	0
624	262	F	2.99178	2016-8-28	2019-8-24	54	0	0	0	0	1	0	1	1	2	0	0	0	deep caries	0	0	7	0	SSC	42	1		-				-	-	-	-	-	-	-	3.5	0
625	262	F	2.99178	2016-8-28	2019-8-24	64	0	0	1	1	0	0	1	1	3	0	0	0	deep caries	0	0	7	0	SSC	42	1		-				-	-	-	-	-	-	-	3.5	0
626	262	F	2.99178	2016-8-28	2019-8-24	84	1	0	1	0	1	0	1	1	3	0	0	0	deep caries	0	0	7	0	SSC	42	1		-				-	-	-	-	-	-	-	3.5	0
627	263	M	6.76164	2012-11-27	2019-8-30	55	0	1	1	0	0	1	1	1	3	0	0	0	deep caries	0	0	7	0	SSC	42	1		-				-	-	-	-	-	-	-	3.5	1
628	264	F	4.32055	2015-5-20	2019-9-13	74	1	0	0	1	1	0	1	1	3	0	0	0	deep caries	0	0	1	0	SSC	42	1		-				-	-	-	-	-	-	-	3.5	0
629	264	F	4.32055	2015-5-20	2019-9-13	84	1	0	0	1	1	0	0	1	2	0	0	0	secondary deep caries	0	0	1	0	SSC	24	0	2023-02-01	chronic periapical periodontitis	0	-	pustules	-	-	-	-	-	-	-	3.5	0
630	265	M	4.48767	2014-10-19	2019-4-13	75	1	1	0	0	1	0	1	1	2	0	0	0	deep caries	0	0	7	0	SSC	42	1		-				-	-	-	-	-	-	-	3.5	0
631	266	M	3.83562	2015-8-8	2019-6-8	74	1	0	1	1	1	1	1	1	5	0	0	0	deep caries	0	0	1	0	SSC	42	1		-				-	-	-	-	-	-	-	3.5	1
632	266	M	3.83562	2015-8-8	2019-6-8	84	1	0	1	1	1	1	1	1	5	0	0	0	deep caries	0	0	1	0	SSC	42	1		-				-	-	-	-	-	-	-	3.5	1
633	267	M	4.36164	2015-3-11	2019-7-20	74	1	0	1	1	1	1	1	1	5	0	0	0	deep caries	0	0	7	0	SSC	36	0	2022-12-29	Retained deciduous teeth	I	-	-	-	-	-	-	-	III°external root resorption		3.5	0
634	267	M	4.36164	2015-3-11	2019-7-20	75	1	1	1	1	1	1	1	1	5	0	0	0	deep caries	0	0	7	0	SSC	42	1	2023-12-29	Retained deciduous teeth	I	-	-	-	-	-	-	-	-	-	3.5	0
635	267	M	4.36164	2015-3-11	2019-7-20	84	1	0	1	1	1	1	1	1	5	0	0	0	deep caries	0	0	7	0	SSC	42	1	2023-01-19	chronic periapical periodontitis	I	-	pustules	-	-	-	-	-	-	-	3.5	0
636	267	M	4.36164	2015-3-11	2019-7-20	85	1	1	1	1	1	1	1	1	5	0	0	0	deep caries	0	0	7	0	SSC	42	1	2023-01-19	chronic periapical periodontitis	I	-	fistula	-	-	-	-	-	-	-	3.5	0
637	268	M	3.10411	2016-10-17	2019-11-23	64	0	0	1	1	1	1	1	1	5	0	0	0	deep caries	0	0	1	0	SSC	42	1		-				-	-	-	-	-	-	-	3.5	0
638	268	M	3.10411	2016-10-17	2019-11-23	74	1	0	0	1	0	0	1	1	2	0	0	0	deep caries	0	0	1	0	SSC	42	1		-				-	-	-	-	-	-	-	3.5	0
639	268	M	3.10411	2016-10-17	2019-11-23	84	1	0	0	1	0	0	1	1	2	0	0	0	deep caries	0	0	1	0	SSC	42	1		-				-	-	-	-	-	-	-	3.5	0
640	269	F	7.10959	2012-10-16	2019-11-23	54	0	0	1	1	1	1	1	1	5	0	0	0	deep caries	0	0	7	0	SSC	6	0	2020-02-27	chronic periapical periodontitis	0	+	pustules	chronic periapical periodontitis					-	-	3.5	0
641	269	F	7.10959	2012-10-16	2019-11-23	55	0	1	1	0	1	0	1	1	3	0	0	0	deep caries	0	0	7	0	SSC	42	1		-				-	-	-	-	-	-	-	3.5	0
642	269	F	7.10959	2012-10-16	2019-11-23	64	0	0	1	1	1	0	1	1	4	0	0	0	deep caries	0	0	7	0	SSC	6	0	2020-03-27	chronic periapical periodontitis	I	+	pustules	chronic periapical periodontitis					-	-	3.5	0
643	269	F	7.10959	2012-10-16	2019-11-23	65	0	1	0	1	0	0	1	1	2	0	0	0	deep caries	0	0	7	0	SSC	42	1	2023-12-10	chronic periapical periodontitis	0	-	-	-	-	-	-	-	-	-	3.5	0
644	269	F	7.10959	2012-10-16	2019-11-23	84	1	0	0	1	1	0	1	1	3	0	0	0	deep caries	0	0	7	0	SSC	42	1		-				-	-	-	-	-	-	-	3.5	0
645	269	F	7.10959	2012-10-16	2019-11-23	85	1	1	1	0	1	0	1	1	3	0	0	0	deep caries	0	0	7	0	SSC	42	1		-				-	-	-	-	-	-	-	3.5	0

## Sheet: iRoot
	basic patient information								decayed tooth surfaces							examination records				image records		treatment information			survival time	status	follow-up
sample number	patient number	gender	age	date of birth	date of treatment	tooth position	maxillary or mandibular tooth	first primary molar or second primary molar	mesial surface	distal surface	buccal surface	lingual surface	occlusal caries	axial caries	number of decayed tooth surfaces	gingival tissues	tooth mobility	perforation of pulp chamber	diagnosis	root resorption	furcation lesions	dentist	material	crown restoration			date of retreatment	diagnosis	tooth mobility	pain on percusion	gingival tissues	6 months	12 months	18 months	24 months	30 months	36 months	42 months	follow-up(year)	Normal replacement of teeth
		F-female; M-male	Directly recording precise age: For example, 2.50 means 2 and a half years old, and 7.75 means 7 years and 9 months old.	year-month-day	year-month-day	FDI World Dental Federation notation	0-maxillary teeth；1-mandibular teeth	0-first primary molar；1-second primary molar	0-no; 1-yes	0-no; 1-yes	0-no; 1-yes	0-no; 1-yes	0-no; 1-yes	Mesial or distal or buccal or lingual surface: 0-no; 1-yes		0-No abnormality	0-(physiological)≤1mm; I-(physiological)>1 mm, but<2 mm; II->2 mm, but<3 mm; III-≥3mm	0-No abnormality		0-No abnormality; 1-Surface resorption; 2-Mid-root resorption; 3-Extensive root resorption	0-No abnormality;1-Density changes	1-dentist 1;2-dentist 2...	0-MTA;1-iRoot BP Plus	SSC-Stainless Steel Crown	(months)	fail-0；success-1	year-month-day	"-"means that no clinical examination abnormalities were found during follow-up	0-(physiological)≤1mm; I-(physiological)>1 mm, but<2 mm; II->2 mm, but<3 mm; III-≥3mm	“-” Negative；“±” weak positive；“＋”positive	"-"means no abnormalities	"-"means no radiographic abnormalities were observed; I°external root resorption-Surface resorption; II°external root resorption-Mid-root resorption; III°external root resorption-Extensive root resorption; I°root furcation shadow-Inter-radicular trabeculation or variation in radiodensity;II°root furcation shadow-Minor inter-radicular radiolucency with trabeculation still present;III°root furcatio…								0-No tooth replacement occurred during the observation period； 1-Normal replacement of teeth
1	1	M	3.69315	2015-11-9	2019-7-19	85	1	1	0	0	0	0	1	0	1	0	0	0	deep caries	0	0	2	1	SSC	18	1						-	-	-					1.5	0
2	2	M	3.5726	2015-12-23	2019-7-19	54	0	0	1	0	0	0	1	1	2	0	0	0	deep caries	0	0	5	1	SSC	18	1						-	-	-					1.5	0
3	2	M	3.5726	2015-12-23	2019-7-19	64	0	0	1	0	0	0	1	1	2	0	0	0	deep caries	0	0	5	1	SSC	18	1						-	-	-					1.5	0
4	2	M	3.5726	2015-12-23	2019-7-19	74	1	0	1	1	0	0	1	1	3	0	0	0	deep caries	0	0	5	1	SSC	18	1						-	-	-					1.5	0
5	2	M	3.5726	2015-12-23	2019-7-19	84	1	0	1	1	0	0	1	1	3	0	0	0	deep caries	0	0	5	1	SSC	18	1						-	-	-					1.5	0
6	3	M	7.08493	2012-6-19	2019-7-19	55	0	1	1	0	0	1	1	1	3	0	0	0	deep caries	0	0	2	1	SSC	18	1						-	-	-					1.5	0
7	3	M	7.08493	2012-6-19	2019-7-19	75	1	1	1	0	0	0	1	1	2	0	0	0	deep caries	0	0	2	1	SSC	18	1						-	-	-					1.5	0
8	4	M	3.77808	2015-11-4	2019-8-14	65	0	1	0	0	0	1	1	1	2	0	0	1	deep caries	0	0	2	1	SSC	18	1						-	-	-					1.5	0
9	5	F	4.46301	2015-4-26	2019-10-11	85	1	1	1	0	0	0	1	1	2	0	0	0	deep caries	0	0	2	1	SSC	18	1						-	-	-					1.5	0
10	6	M	3.09863	2016-9-5	2019-10-11	54	0	0	1	1	0	0	1	1	3	0	0	0	deep caries	0	0	5	1	SSC	18	1						-	-	-					1.5	0
11	6	M	3.09863	2016-9-5	2019-10-11	64	0	0	1	0	1	1	0	1	3	0	0	0	deep caries	0	0	5	1	SSC	18	1						-	-	-					1.5	0
12	7	M	6.73973	2013-1-21	2019-10-17	54	0	0	1	0	1	0	1	1	3	0	0	0	deep caries	0	0	2	1	SSC	18	1						-	-	-					1.5	0
13	7	M	6.73973	2013-1-21	2019-10-17	55	0	1	1	0	0	0	1	1	2	0	0	0	deep caries	0	0	2	1	SSC	18	1						-	-	-					1.5	0
14	8	F	4.39452	2015-7-2	2019-11-22	74	1	0	0	1	0	0	1	1	2	0	0	0	deep caries	0	0	7	1	SSC	18	1						-	-	-					1.5	0
15	8	F	4.39452	2015-7-2	2019-11-22	75	1	1	0	1	1	0	0	1	2	0	0	0	deep caries	0	0	7	1	SSC	18	1						-	-	-					1.5	0
16	9	F	4.99452	2014-12-2	2019-11-29	54	0	0	0	0	1	1	1	1	3	0	0	0	deep caries	0	0	7	1	SSC	18	1						-	-	-					1.5	0
17	9	F	4.99452	2014-12-2	2019-11-29	55	0	1	0	0	0	1	1	1	2	0	0	0	deep caries	0	0	7	1	SSC	18	1						-	-	-					1.5	0
18	9	F	4.99452	2014-12-2	2019-11-29	64	0	0	1	0	1	0	1	1	3	0	0	0	deep caries	0	0	7	1	SSC	18	1						-	-	-					1.5	0
19	10	F	4.74521	2015-3-9	2019-12-5	75	1	1	1	0	0	0	1	1	2	0	0	0	deep caries	0	0	2	1	SSC	18	1						-	-	-					1.5	0
20	11	F	4.57808	2015-5-9	2019-12-5	75	1	1	1	0	0	1	1	1	3	0	0	0	deep caries	0	0	3	1	SSC	18	1						-	-	-					1.5	0
21	12	F	4.72055	2015-3-25	2019-12-12	74	1	0	1	1	0	0	1	1	3	0	0	0	deep caries	0	0	5	1	SSC	18	1						-	-	-					1.5	0
22	13	M	4.05753	2015-12-6	2019-12-26	84	1	0	0	0	0	0	1	0	1	0	0	0	deep caries	0	0	4	1	SSC	18	1						-	-	-					1.5	0
23	14	M	5.98904	2014-1-7	2020-1-2	85	1	1	1	0	0	0	1	1	2	0	0	0	deep caries	0	0	3	1	SSC	18	1						-	-	-					1.5	0
24	15	F	5.86849	2014-8-7	2020-6-18	64	0	0	0	1	0	0	1	1	2	0	0	0	deep caries	0	0	7	1	SSC	18	1						-	-	-					1.5	0
25	15	F	5.86849	2014-8-7	2020-6-18	65	0	1	1	0	0	0	1	1	2	0	0	0	deep caries	0	0	7	1	SSC	18	1						-	-	-					1.5	0
26	15	F	5.86849	2014-8-7	2020-6-18	84	1	0	0	1	0	0	1	1	2	0	0	0	deep caries	0	0	7	1	SSC	18	1						-	-	-					1.5	0
27	15	F	5.86849	2014-8-7	2020-6-18	85	1	1	1	0	0	0	1	1	2	0	0	0	deep caries	0	0	7	1	SSC	18	1						-	-	-					1.5	0
28	16	M	3.99452	2016-8-10	2020-8-7	84	1	0	0	0	0	0	1	0	1	0	0	0	deep caries	0	0	7	1	SSC	18	1						-	-	-					1.5	0
29	16	M	3.99452	2016-8-10	2020-8-7	85	1	1	0	0	0	0	1	0	1	0	0	0	deep caries	0	0	7	1	SSC	18	1						-	-	-					1.5	0
30	17	M	3.65753	2016-12-16	2020-8-12	65	0	1	0	1	1	0	1	1	3	0	0	0	deep caries	0	0	2	1	SSC	18	1						-	-	-					1.5	0
31	17	M	3.65753	2016-12-16	2020-8-12	75	1	1	1	1	1	1	1	1	5	0	0	0	deep caries	0	0	2	1	SSC	18	1						-	-	-					1.5	0
32	18	F	4.33151	2016-5-19	2020-9-16	55	0	1	0	0	0	0	1	0	1	0	0	0	deep caries	0	0	3	1	SSC	18	1						-	-	-					1.5	0
33	18	F	4.33151	2016-5-19	2020-9-16	84	1	0	0	1	0	0	1	1	2	0	0	0	deep caries	0	0	3	1	SSC	18	1						-	-	-					1.5	0
34	18	F	4.33151	2016-5-19	2020-9-16	85	1	1	0	0	0	0	1	0	1	0	0	0	deep caries	0	0	3	1	SSC	18	1						-	-	-					1.5	0
35	19	M	5.73151	2014-12-26	2020-9-17	54	0	0	0	1	0	0	1	1	2	0	0	0	deep caries	0	0	7	1	SSC	18	1						-	-	-					1.5	0
36	19	M	5.73151	2014-12-26	2020-9-17	55	0	1	0	0	0	1	1	1	2	0	0	0	deep caries	0	0	7	1	SSC	18	1						-	-	-					1.5	0
37	19	M	5.73151	2014-12-26	2020-9-17	64	0	0	0	1	0	0	1	1	2	0	0	0	deep caries	0	0	7	1	SSC	18	1						-	-	-					1.5	0
38	20	F	4.39178	2016-4-29	2020-9-18	84	1	0	0	1	0	0	1	1	2	0	0	0	deep caries	0	0	2	1	SSC	18	1						-	-	-					1.5	0
39	21	M	4.34795	2016-6-19	2020-10-23	84	1	0	0	1	0	0	1	1	2	0	0	0	deep caries	0	0	2	1	SSC	18	1						-	-	-					1.5	0
40	22	F	6.02192	2014-10-23	2020-10-29	55	0	1	1	0	0	0	1	1	2	0	0	0	deep caries	0	0	7	1	SSC	18	1						-	-	-					1.5	0
41	22	F	6.02192	2014-10-23	2020-10-29	65	0	1	1	0	0	0	1	1	2	0	0	0	deep caries	0	0	7	1	SSC	18	1						-	-	-					1.5	0
42	23	M	5.33699	2015-7-6	2020-11-4	85	1	1	1	0	0	0	1	1	2	0	0	0	deep caries	0	0	4	1	SSC	18	1						-	-	-					1.5	0
43	24	M	4.16712	2016-9-7	2020-11-6	54	0	0	1	1	1	0	1	1	4	0	0	0	deep caries	0	0	2	1	SSC	18	1						-	-	-					1.5	0
44	24	M	4.16712	2016-9-7	2020-11-6	64	0	0	1	1	1	0	1	1	4	0	0	0	deep caries	0	0	2	1	SSC	18	1						-	-	-					1.5	0
45	24	M	4.16712	2016-9-7	2020-11-6	74	1	0	1	1	1	0	1	1	4	0	0	0	deep caries	0	0	2	1	SSC	18	1						-	-	-					1.5	0
46	25	M	4.1726	2016-9-24	2020-11-25	64	0	0	0	1	0	0	1	1	2	0	0	0	deep caries	0	0	3	1	SSC	18	1						-	-	-					1.5	0
47	26	F	6.00274	2014-12-12	2020-12-11	65	0	1	1	0	0	1	1	1	3	0	0	0	deep caries	0	0	7	1	SSC	18	1						-	-	-					1.5	0
48	27	M	3.84932	2017-2-17	2020-12-23	75	1	1	0	0	0	0	1	0	1	0	0	0	deep caries	0	0	3	1	SSC	18	1						-	-	-					1.5	0
49	27	M	3.84932	2017-2-17	2020-12-23	85	1	1	0	0	0	0	1	0	1	0	0	0	deep caries	0	0	3	1	SSC	18	1						-	-	-					1.5	0
50	28	M	3.23836	2017-9-28	2020-12-23	54	0	0	1	1	1	0	1	1	4	0	0	0	deep caries	0	0	7	1	SSC	18	1						-	-	-					1.5	0
51	28	M	3.23836	2017-9-28	2020-12-23	55	0	1	0	0	0	0	1	0	1	0	0	0	deep caries	0	0	7	1	SSC	18	1						-	-	-					1.5	0
52	28	M	3.23836	2017-9-28	2020-12-23	84	1	0	0	0	0	0	1	0	1	0	0	0	deep caries	0	0	7	1	SSC	18	1						-	-	-					1.5	0
53	28	M	3.23836	2017-9-28	2020-12-23	85	1	1	0	1	0	0	1	1	2	0	0	0	deep caries	0	0	7	1	SSC	18	1						-	-	-					1.5	0
54	29	F	5.56438	2015-6-3	2020-12-24	84	1	0	0	1	0	0	1	1	2	0	0	0	deep caries	0	0	3	1	SSC	18	1						-	-	-					1.5	0
55	30	M	5.72329	2013-10-15	2019-7-5	55	0	1	0	0	0	0	1	0	1	0	0	0	deep caries	0	0	5	1	SSC	24	1						-	-	-	-				2	0
56	30	M	5.72329	2013-10-15	2019-7-5	75	1	1	0	0	0	0	1	0	1	0	0	0	deep caries	0	0	5	1	SSC	24	1						-	-	-	-				2	1
57	31	M	3.4	2016-3-2	2019-7-26	54	0	0	1	1	1	0	1	1	4	0	0	0	deep caries	0	0	2	1	SSC	24	1						-	-	-	-				2	0
58	31	M	3.4	2016-3-2	2019-7-26	64	0	0	1	0	0	0	1	1	2	0	0	0	deep caries	0	0	2	1	SSC	24	1						-	-	-	-				2	0
59	32	M	4.92329	2014-9-7	2019-8-9	55	0	1	0	0	0	1	1	1	2	0	0	0	deep caries	0	0	2	1	SSC	24	1						-	-	-	-				2	0
60	33	M	6.53151	2013-2-4	2019-8-16	54	0	0	0	1	0	0	1	1	2	0	0	0	deep caries	0	0	5	1	SSC	24	1						-	-	-	-				2	0
61	33	M	6.53151	2013-2-4	2019-8-16	65	0	1	1	0	0	0	1	1	2	0	0	0	deep caries	0	0	5	1	SSC	24	1						-	-	-	-				2	0
62	34	M	4.01918	2015-8-30	2019-9-5	64	0	0	0	0	1	0	1	1	2	0	0	0	deep caries	0	0	2	1	SSC	30	1						-	-	-	-	-			2.5	0
63	35	M	3.90685	2015-10-16	2019-9-11	54	0	0	0	1	1	0	1	1	3	0	0	0	deep caries	0	0	7	1	SSC	24	1						-	-	-	-				2	0
64	35	M	3.90685	2015-10-16	2019-9-11	64	0	0	0	1	1	0	1	1	3	0	0	0	deep caries	0	0	7	1	SSC	24	1						-	-	-	-				2	0
65	35	M	3.90685	2015-10-16	2019-9-11	84	1	0	0	1	0	0	1	1	2	0	0	0	deep caries	0	0	7	1	SSC	24	1						-	pulp canal obliteration	pulp canal obliteration	pulp canal obliteration				2	0
66	36	M	3.58904	2016-2-10	2019-9-12	84	1	0	0	1	0	0	1	1	2	0	0	0	deep caries	0	0	6	1	SSC	24	1						-	-	-	pulp canal obliteration				2	0
67	37	F	3.23562	2016-7-5	2019-9-29	55	0	1	1	1	1	1	1	1	5	0	0	0	deep caries	0	0	5	1	SSC	24	1						-	-	-	-				2	0
68	37	F	3.23562	2016-7-5	2019-9-29	65	0	1	1	1	1	1	1	1	5	0	0	0	deep caries	0	0	5	1	SSC	24	1						-	-	-	-				2	0
69	37	F	3.23562	2016-7-5	2019-9-29	74	1	0	0	1	1	0	1	1	3	0	0	0	deep caries	0	0	5	1	SSC	24	1						-	-	-	-				2	0
70	37	F	3.23562	2016-7-5	2019-9-29	75	1	1	1	0	1	1	1	1	4	0	0	0	deep caries	0	0	5	1	SSC	24	1						-	-	-	-				2	0
71	37	F	3.23562	2016-7-5	2019-9-29	84	1	0	1	0	0	0	1	1	2	0	0	0	deep caries	0	0	5	1	SSC	24	1						-	-	-	-				2	0
72	38	M	2.88493	2016-11-28	2019-10-17	54	0	0	0	0	0	0	1	0	1	0	0	0	deep caries	0	0	2	1	SSC	30	1						-	-	-	-	-			2.5	0
73	38	M	2.88493	2016-11-28	2019-10-17	64	0	0	0	0	1	0	1	1	2	0	0	0	deep caries	0	0	2	1	SSC	30	1						-	-	-	-	-			2.5	0
74	38	M	2.88493	2016-11-28	2019-10-17	74	1	0	0	0	0	0	1	0	1	0	0	0	deep caries	0	0	2	1	SSC	30	1						-	-	-	-	-			2.5	0
75	38	M	2.88493	2016-11-28	2019-10-17	84	1	0	0	0	0	0	1	0	1	0	0	0	deep caries	0	0	2	1	SSC	30	1						-	-	-	-	-			2.5	0
76	39	F	5.33699	2014-7-1	2019-10-31	55	0	1	1	0	1	1	1	1	4	0	0	0	deep caries	0	0	7	1	SSC	24	1						-	-	-	-				2	0
77	39	F	5.33699	2014-7-1	2019-10-31	64	0	0	0	1	0	0	1	1	2	0	0	0	deep caries	0	0	7	1	SSC	24	1						-	-	-	-				2	0
78	39	F	5.33699	2014-7-1	2019-10-31	75	1	1	1	0	1	0	1	1	3	0	0	0	deep caries	0	0	7	1	SSC	24	1						-	-	-	-				2	0
79	39	F	5.33699	2014-7-1	2019-10-31	84	1	0	0	1	1	0	1	1	3	0	0	0	deep caries	0	0	7	1	SSC	24	1						-	pulp canal obliteration	pulp canal obliteration	pulp canal obliteration				2	0
80	39	F	5.33699	2014-7-1	2019-10-31	85	1	1	1	0	1	0	1	1	3	0	0	0	deep caries	0	0	7	1	SSC	24	1						-	-	-	pulp canal obliteration				2	0
81	40	M	2.53425	2017-4-25	2019-11-6	64	0	0	0	0	1	0	1	1	2	0	0	0	deep caries	0	0	2	1	SSC	24	1						-	-	-	-				2	0
82	40	M	2.53425	2017-4-25	2019-11-6	84	1	0	0	1	0	0	1	1	2	0	0	0	deep caries	0	0	2	1	SSC	24	1						-	-	-	-				2	0
83	41	M	4.31507	2015-7-15	2019-11-6	84	1	0	0	1	0	0	1	1	2	0	0	0	deep caries	0	0	2	1	SSC	24	1						-	-	-	-				2	0
84	42	M	5.87671	2013-12-24	2019-11-8	55	0	1	0	0	0	1	1	1	2	0	0	0	deep caries	0	0	2	1	SSC	24	1						-	-	-	pulp canal obliteration				2	0
85	43	M	4.09863	2015-10-17	2019-11-21	54	0	0	0	0	1	0	1	1	2	0	0	0	deep caries	0	0	2	1	SSC	24	1						-	-	-	-				2	0
86	43	M	4.09863	2015-10-17	2019-11-21	74	1	0	1	1	0	0	1	1	3	0	0	0	deep caries	0	0	2	1	SSC	24	1						-	-	-	-				2	0
87	43	M	4.09863	2015-10-17	2019-11-21	84	1	0	1	1	0	0	1	1	3	0	0	0	deep caries	0	0	2	1	SSC	24	1						-	-	-	-				2	0
88	43	M	4.09863	2015-10-17	2019-11-21	85	1	1	1	1	0	0	1	1	3	0	0	0	deep caries	0	0	2	1	SSC	24	1						-	-	-	-				2	0
89	44	F	5.08493	2014-10-23	2019-11-22	74	1	0	1	0	0	0	1	1	2	0	0	0	deep caries	0	0	7	1	SSC	24	1						-	-	-	-				2	0
90	45	F	4.8	2015-2-10	2019-11-28	54	0	0	1	0	1	1	1	1	4	0	0	0	deep caries	0	0	7	1	SSC	24	1						-	-	-	-				2	0
91	45	F	4.8	2015-2-10	2019-11-28	64	0	0	0	1	1	1	1	1	4	0	0	0	deep caries	0	0	7	1	SSC	24	1						-	-	-	-				2	0
92	46	F	4.7863	2015-3-8	2019-12-19	84	1	0	1	1	0	0	1	1	3	0	0	0	deep caries	0	0	5	1	SSC	24	1						-	-	-	-				2	0
93	47	M	3.03836	2016-12-13	2019-12-27	74	1	0	0	0	0	0	1	0	1	0	0	0	deep caries	0	0	7	1	SSC	24	1						-	-	-	-				2	0
94	47	M	3.03836	2016-12-13	2019-12-27	84	1	0	1	0	0	0	1	1	2	0	0	0	deep caries	0	0	7	1	SSC	24	1						-	-	-	-				2	0
95	48	M	3.73973	2016-4-7	2020-1-2	75	1	1	1	0	1	0	1	1	3	0	0	0	deep caries	0	0	2	1	SSC	24	1						-	-	-	-				2	0
96	49	F	4.72329	2015-9-8	2020-5-28	64	0	0	0	1	0	0	1	1	2	0	0	0	deep caries	0	0	3	1	SSC	24	1						-	-	-	-				2	0
97	49	F	4.72329	2015-9-8	2020-5-28	74	1	0	1	0	0	0	1	1	2	0	0	0	deep caries	0	0	3	1	SSC	24	1						-	pulp canal obliteration	pulp canal obliteration	pulp canal obliteration				2	0
98	49	F	4.72329	2015-9-8	2020-5-28	85	1	1	0	0	0	0	1	0	1	0	0	0	deep caries	0	0	3	1	SSC	24	1						-	-	-	-				2	0
99	50	M	4.73699	2015-9-17	2020-6-11	54	0	0	0	1	0	0	1	1	2	0	0	0	deep caries	0	0	7	1	SSC	24	1						-	-	-	-				2	0
100	51	F	5.30411	2015-3-22	2020-7-9	85	1	1	0	0	0	0	1	0	1	0	0	0	deep caries	0	0	3	1	SSC	24	1						-	-	-	-				2	0
101	52	F	4.45479	2016-2-2	2020-7-16	55	0	1	1	0	0	0	1	1	2	0	0	0	deep caries	0	0	3	1	SSC	24	1						-	-	-	-				2	0
102	53	M	3.75616	2016-10-27	2020-7-29	54	0	0	0	0	0	0	1	0	1	0	0	0	deep caries	0	0	3	1	SSC	24	1						-	-	-	-				2	0
103	54	M	5.16438	2015-6-2	2020-7-30	54	0	0	0	1	1	0	1	1	3	0	0	0	deep caries	0	0	7	1	SSC	24	1						pulp canal obliteration	pulp canal obliteration	pulp canal obliteration	pulp canal obliteration				2	0
104	54	M	5.16438	2015-6-2	2020-7-30	55	0	1	1	0	0	0	1	1	2	0	0	0	deep caries	0	0	7	1	SSC	24	1						pulp canal obliteration	pulp canal obliteration	pulp canal obliteration	pulp canal obliteration				2	1
105	54	M	5.16438	2015-6-2	2020-7-30	65	0	1	1	0	0	0	1	1	2	0	0	0	deep caries	0	0	7	1	SSC	24	1						pulp canal obliteration	pulp canal obliteration	pulp canal obliteration	pulp canal obliteration				2	1
106	55	M	4.41644	2016-3-2	2020-7-31	55	0	1	1	1	1	1	1	1	5	0	0	0	deep caries	0	0	2	1	SSC	24	1						-	-	-	-				2	0
107	55	M	4.41644	2016-3-2	2020-7-31	65	0	1	0	0	0	1	1	1	2	0	0	0	deep caries	0	0	2	1	SSC	24	1						-	-	-	-				2	0
108	56	M	3.95068	2016-8-31	2020-8-12	55	0	1	1	1	1	1	1	1	5	0	0	0	deep caries	0	0	4	1	SSC	24	1						-	-	-	-				2	0
109	56	M	3.95068	2016-8-31	2020-8-12	75	1	1	1	0	0	0	1	1	2	0	0	0	deep caries	0	0	4	1	SSC	24	1						-	-	-	-				2	0
110	56	M	3.95068	2016-8-31	2020-8-12	85	1	1	1	0	0	0	1	1	2	0	0	0	deep caries	0	0	4	1	SSC	24	1						-	-	-	-				2	0
111	57	F	3.51233	2017-2-8	2020-8-13	74	1	0	0	1	0	0	1	1	2	0	0	0	deep caries	0	0	6	1	SSC	24	1						-	-	-	-				2	0
112	57	F	3.51233	2017-2-8	2020-8-13	84	1	0	0	1	0	0	1	1	2	0	0	0	deep caries	0	0	6	1	SSC	24	1						-	-	-	pulp canal obliteration				2	0
113	58	F	3.81644	2016-11-4	2020-8-28	54	0	0	0	0	0	0	1	0	1	0	0	0	deep caries	0	0	3	1	SSC	30	0	2023-02-14	chronic pulpitis	0	±	-	-	-	-	-	chronic pulpitis			2.5	0
114	58	F	3.81644	2016-11-4	2020-8-28	64	0	0	0	0	1	0	1	1	2	0	0	0	deep caries	0	0	3	1	SSC	30	1						-	-	-	-	-			2.5	0
115	58	F	3.81644	2016-11-4	2020-8-28	65	0	1	0	0	0	0	1	0	1	0	0	0	deep caries	0	0	3	1	SSC	30	1						-	-	-	-	-			2.5	0
116	59	F	3.22466	2017-6-15	2020-9-4	84	1	0	0	0	0	0	1	0	1	0	0	0	deep caries	0	0	3	1	SSC	24	1						-	-	-	-				2	0
117	60	M	4.76986	2015-12-11	2020-9-16	75	1	1	0	0	0	0	1	0	1	0	0	0	deep caries	0	0	7	1	SSC	24	1						-	-	-	-				2	0
118	61	M	3.45753	2017-4-11	2020-9-24	54	0	0	0	1	0	0	1	1	2	0	0	0	deep caries	0	0	5	1	SSC	24	1						-	-	-	-				2	0
119	61	M	3.45753	2017-4-11	2020-9-24	64	0	0	0	1	0	0	1	1	2	0	0	0	deep caries	0	0	5	1	SSC	24	1						-	-	-	-				2	0
120	61	M	3.45753	2017-4-11	2020-9-24	65	0	1	0	0	0	0	1	0	1	0	0	0	deep caries	0	0	5	1	SSC	24	1						-	-	-	-				2	0
121	61	M	3.45753	2017-4-11	2020-9-24	75	1	1	0	0	0	0	1	0	1	0	0	0	deep caries	0	0	5	1	SSC	24	1						-	-	-	-				2	0
122	61	M	3.45753	2017-4-11	2020-9-24	85	1	1	0	0	0	0	1	0	1	0	0	0	deep caries	0	0	5	1	SSC	24	1						-	-	-	-				2	0
123	62	M	5.01644	2015-9-21	2020-9-25	75	1	1	1	0	0	0	1	1	2	0	0	0	deep caries	0	0	2	1	SSC	24	1						-	-	-	-				2	0
124	62	M	5.01644	2015-9-21	2020-9-25	85	1	1	1	0	0	0	1	1	2	0	0	0	deep caries	0	0	2	1	SSC	24	1						-	-	-	pulp canal obliteration				2	0
125	63	M	5.69863	2015-1-28	2020-10-8	54	0	0	1	1	0	0	1	1	3	0	0	0	deep caries	0	0	3	1	SSC	24	1						-	-	-	-				2	0
126	63	M	5.69863	2015-1-28	2020-10-8	64	0	0	1	1	0	0	1	1	3	0	0	0	deep caries	0	0	3	1	SSC	24	1						-	-	-	-				2	0
127	64	M	4.40822	2016-5-26	2020-10-21	75	1	1	0	0	0	0	1	0	1	0	0	0	deep caries	0	0	3	1	SSC	24	1						-	-	-	-				2	0
128	65	M	6.28493	2014-7-11	2020-10-21	54	0	0	0	1	0	1	1	1	3	0	0	0	deep caries	0	0	3	1	SSC	24	1						-	-	-	-				2	0
129	65	M	6.28493	2014-7-11	2020-10-21	64	0	0	0	1	0	1	1	1	3	0	0	0	deep caries	0	0	3	1	SSC	24	1						-	-	-	-				2	0
130	66	M	3.79452	2017-1-20	2020-11-5	54	0	0	0	0	0	0	1	0	1	0	0	0	deep caries	0	0	3	1	SSC	24	1						-	-	-	-				2	0
131	67	F	5.39178	2015-6-24	2020-11-12	65	0	1	1	0	0	0	1	1	2	0	0	0	deep caries	0	0	7	1	SSC	24	1						-	-	pulp canal obliteration	pulp canal obliteration				2	1
132	68	F	5.90685	2014-12-19	2020-11-13	65	0	1	0	0	0	0	1	0	1	0	0	0	deep caries	0	0	7	1	SSC	24	1						-	-	-	-				2	0
133	69	F	3.54521	2017-5-5	2020-11-19	84	1	0	0	0	0	0	1	0	1	0	0	0	deep caries	0	0	5	1	SSC	24	1						-	-	-	pulp canal obliteration				2	0
134	70	F	5.15616	2015-10-2	2020-11-26	65	0	1	1	0	0	1	1	1	3	0	0	0	deep caries	0	0	6	1	SSC	24	1						-	-	-	-				2	0
135	70	F	5.15616	2015-10-2	2020-11-26	84	1	0	1	1	0	0	1	1	3	0	0	0	deep caries	0	0	6	1	SSC	24	1						-	-	-	-				2	0
136	71	F	3.9863	2016-12-8	2020-12-2	54	0	0	1	0	1	0	0	1	2	0	0	0	deep caries	0	0	3	1	SSC	24	1						pulp canal obliteration	pulp canal obliteration	pulp canal obliteration	pulp canal obliteration				2	0
137	71	F	3.9863	2016-12-8	2020-12-2	65	0	1	1	0	0	1	1	1	3	0	0	0	deep caries	0	0	3	1	SSC	24	1						-	-	-	-				2	0
138	72	M	3.80548	2017-2-21	2020-12-11	55	0	1	1	0	0	1	1	1	3	0	0	0	deep caries	0	0	7	1	SSC	24	1						-	-	-	pulp canal obliteration				2	0
139	72	M	3.80548	2017-2-21	2020-12-11	84	1	0	0	1	0	0	1	1	2	0	0	0	deep caries	0	0	7	1	SSC	24	0						-	-	-	III°external root resorption				2	0
140	73	F	6.02466	2014-12-9	2020-12-16	74	1	0	1	1	0	0	1	1	3	0	0	0	deep caries	0	0	3	1	SSC	24	0						-	-	-	II°external root resorption				2	0
141	74	M	5.5726	2015-5-23	2020-12-16	84	1	0	0	0	0	0	1	0	1	0	0	0	deep caries	0	0	3	1	SSC	18	0						-	-	internal root resorption	internal root resorption				2	0
142	74	M	5.5726	2015-5-23	2020-12-16	85	1	1	0	0	0	0	1	0	1	0	0	0	deep caries	0	0	3	1	SSC	24	1						-	-	-	-				2	0
143	75	F	3.87397	2017-2-1	2020-12-16	74	1	0	0	0	1	0	1	1	2	0	0	0	deep caries	0	0	2	1	SSC	24	1						-	-	-	-				2	0
144	76	F	5.84932	2015-2-26	2020-12-31	64	0	0	1	1	0	0	1	1	3	0	0	0	deep caries	0	0	3	1	SSC	24	1						-	-	-	-				2	1
145	77	M	3.88493	2017-3-6	2021-1-22	55	0	1	0	0	0	1	1	1	2	0	0	0	deep caries	0	0	7	1	SSC	24	1						-	-	-	-				2	0
146	77	M	3.88493	2017-3-6	2021-1-22	65	0	1	0	0	0	1	1	1	2	0	0	0	deep caries	0	0	7	1	SSC	24	1						-	-	-	-				2	0
147	77	M	3.88493	2017-3-6	2021-1-22	75	1	1	1	1	1	0	1	1	4	0	0	0	deep caries	0	0	7	1	SSC	24	1						-	-	-	-				2	0
148	77	M	3.88493	2017-3-6	2021-1-22	85	1	1	1	1	1	0	1	1	4	0	0	0	deep caries	0	0	7	1	SSC	24	1						-	-	-	-				2	0
149	78	M	4.89041	2014-9-12	2019-8-2	75	1	1	0	0	0	0	1	0	1	0	0	0	deep caries	0	0	5	1	SSC	30	1						-	-	-	-	pulp canal obliteration			2.5	0
150	78	M	4.89041	2014-9-12	2019-8-2	85	1	1	1	0	0	0	1	1	2	0	0	0	deep caries	0	0	5	1	SSC	30	1						-	-	-	-	-			2.5	0
151	79	F	3.45479	2016-3-8	2019-8-21	55	0	1	0	1	0	0	1	1	2	0	0	0	deep caries	0	0	4	1	SSC	30	1						-	-	-	-	-			2.5	0
152	79	F	3.45479	2016-3-8	2019-8-21	75	1	1	0	0	0	0	1	0	1	0	0	0	deep caries	0	0	4	1	SSC	30	1						-	-	-	-	-			2.5	0
153	79	F	3.45479	2016-3-8	2019-8-21	85	1	1	1	0	0	0	1	0	2	0	0	0	deep caries	0	0	4	1	SSC	30	1						-	-	-	-	-			2.5	0
154	80	F	4.43014	2015-4-1	2019-9-4	84	1	0	1	1	0	0	1	1	3	0	0	0	deep caries	0	0	4	1	SSC	36	1						-	-	-	-	-	-		3	0
155	80	F	4.43014	2015-4-1	2019-9-4	85	1	1	1	1	0	0	1	1	3	0	0	0	deep caries	0	0	4	1	SSC	36	0	2022-10-30	chronic periapical periodontitis	I	-	pustules	-	-	-	-	chronic periapical periodontitis	chronic periapical periodontitis		3	0
156	81	M	4.01918	2015-8-30	2019-9-5	85	1	1	1	1	0	0	1	1	3	0	0	0	deep caries	0	0	2	1	SSC	30	1						-	-	-	pulp canal obliteration	pulp canal obliteration			2.5	0
157	82	M	4.85205	2014-11-20	2019-9-26	74	1	0	0	1	0	0	1	1	2	0	0	0	deep caries	0	0	2	1	SSC	30	1						-	-	-	-	-			2.5	0
158	82	M	4.85205	2014-11-20	2019-9-26	84	1	0	1	0	0	0	1	1	2	0	0	0	deep caries	0	0	2	1	SSC	30	1						-	-	-	-	-			2.5	0
159	82	M	4.85205	2014-11-20	2019-9-26	85	1	1	0	1	0	0	1	1	2	0	0	0	deep caries	0	0	2	1	SSC	30	1						-	-	-	-	-			2.5	0
160	83	M	6.2411	2013-7-1	2019-9-26	64	0	0	1	1	0	0	1	1	3	0	0	0	deep caries	0	0	2	1	SSC	30	1	2023-01-30	Retained deciduous teeth	I	-	-	-	-	-	-	-		Retained deciduous teeth	2.5	0
161	84	F	4.92603	2014-11-13	2019-10-16	55	0	1	1	0	0	0	1	1	2	0	0	0	deep caries	0	0	7	1	SSC	30	1						-	-	-	-	-			2.5	0
162	84	F	4.92603	2014-11-13	2019-10-16	64	0	0	1	1	1	0	1	1	4	0	0	0	deep caries	0	0	7	1	SSC	30	1						-	-	-	-	pulp canal obliteration			2.5	0
163	84	F	4.92603	2014-11-13	2019-10-16	74	1	0	0	1	0	0	1	1	2	0	0	0	deep caries	0	0	7	1	SSC	12	0	2022-05-23	chronic periapical periodontitis	0	-	-	-	III°root furcation shadow	III°root furcation shadow	III°root furcation shadow	III°root furcation shadow；II°external root resorption			2.5	0
164	85	F	3.8	2016-1-19	2019-11-6	74	1	0	0	0	0	0	1	0	1	0	0	0	deep caries	0	0	3	1	SSC	30	1						-	-	-	-	-			2.5	0
165	86	M	6.29589	2013-7-23	2019-11-7	54	0	0	0	1	0	0	1	1	2	0	0	0	deep caries	0	0	5	1	SSC	30	1						-	-	-	-	-			2.5	1
166	86	M	6.29589	2013-7-23	2019-11-7	55	0	1	1	0	0	0	1	1	2	0	0	0	deep caries	3	0	5	1	SSC	12	0						-	III°external root resorption	III°external root resorption	III°external root resorption	III°external root resorption			2.5	0
167	86	M	6.29589	2013-7-23	2019-11-7	64	0	0	1	1	0	0	1	1	3	0	0	0	deep caries	0	0	5	1	SSC	30	1						-	-	-	-	-			2.5	1
168	87	F	4.62466	2015-4-15	2019-11-28	84	1	0	0	1	0	0	1	1	2	0	0	0	deep caries	0	0	3	1	SSC	30	1						-	-	-	-	-			2.5	0
169	88	F	5.12877	2014-10-20	2019-12-5	55	0	1	1	0	0	0	1	1	2	0	0	0	deep caries	0	0	3	1	SSC	30	1						-	-	-	-	-			2.5	1
170	89	M	3.74521	2016-3-21	2019-12-18	85	1	1	1	0	1	0	1	1	3	0	0	0	deep caries	0	0	2	1	SSC	30	1						-	-	-	-	-			2.5	0
171	90	M	4.7589	2015-3-18	2019-12-19	55	0	1	1	1	0	1	1	1	4	0	0	0	deep caries	0	0	6	1	SSC	30	1						-	-	-	-	-			2.5	0
172	90	M	4.7589	2015-3-18	2019-12-19	65	0	1	1	1	0	1	1	1	4	0	0	0	deep caries	0	0	6	1	SSC	30	1						-	-	-	-	-			2.5	0
173	91	M	4.96164	2015-1-3	2019-12-19	55	0	1	1	1	1	0	1	1	4	0	0	0	deep caries	0	0	2	1	SSC	30	1						-	-	-	-	-			2.5	0
174	91	M	4.96164	2015-1-3	2019-12-19	64	0	0	0	1	1	0	0	1	2	0	0	0	deep caries	0	0	2	1	SSC	30	1						-	-	pulp canal obliteration	pulp canal obliteration	pulp canal obliteration			2.5	0
175	91	M	4.96164	2015-1-3	2019-12-19	65	0	1	1	0	0	0	1	1	2	0	0	0	deep caries	0	0	2	1	SSC	30	1						-	-	pulp canal obliteration	pulp canal obliteration	pulp canal obliteration			2.5	0
176	92	F	4.08219	2015-11-26	2019-12-25	84	1	0	1	1	1	1	1	1	5	0	0	0	deep caries	0	0	3	1	SSC	30	1						-	-	-	-	-			2.5	1
177	93	F	5.77534	2014-3-27	2020-1-3	74	1	0	0	1	0	0	1	1	2	0	0	0	deep caries	0	0	7	1	SSC	30	1						-	-	-	-	-			2.5	0
178	93	F	5.77534	2014-3-27	2020-1-3	75	1	1	1	1	1	1	1	1	5	0	0	0	deep caries	0	0	7	1	SSC	30	1						-	-	-	-	-			2.5	0
179	93	F	5.77534	2014-3-27	2020-1-3	84	1	0	0	1	0	0	1	1	2	0	0	0	deep caries	0	0	7	1	SSC	30	1						-	-	-	-	-			2.5	0
180	94	F	3.18082	2016-11-4	2020-1-9	54	0	0	1	1	1	1	1	1	5	0	0	0	deep caries	0	0	7	1	SSC	30	1						-	-	-	-	-			2.5	0
181	94	F	3.18082	2016-11-4	2020-1-9	64	0	0	1	1	1	1	1	1	5	0	0	0	deep caries	0	0	7	1	SSC	30	1						-	-	-	-	-			2.5	0
182	94	F	3.18082	2016-11-4	2020-1-9	74	1	0	1	1	1	1	1	1	5	0	0	0	deep caries	0	0	7	1	SSC	30	1						-	-	-	-	-			2.5	0
183	94	F	3.18082	2016-11-4	2020-1-9	75	1	1	1	0	1	0	1	1	3	0	0	0	deep caries	0	0	7	1	SSC	30	1						-	-	-	-	-			2.5	0
184	94	F	3.18082	2016-11-4	2020-1-9	84	1	0	1	1	1	1	1	1	5	0	0	0	deep caries	0	0	7	1	SSC	30	1						-	-	-	-	-			2.5	0
185	94	F	3.18082	2016-11-4	2020-1-9	85	1	1	1	0	1	0	1	1	3	0	0	0	deep caries	0	0	7	1	SSC	30	1						-	-	-	-	-			2.5	0
186	95	F	5.02466	2015-1-9	2020-1-17	54	0	0	0	1	0	0	1	1	2	0	0	0	deep caries	0	0	7	1	SSC	30	1						-	-	-	-	-			2.5	1
187	95	F	5.02466	2015-1-9	2020-1-17	55	0	1	1	0	0	0	1	1	2	0	0	0	deep caries	0	0	7	1	SSC	30	1						-	-	-	-	-			2.5	1
188	95	F	5.02466	2015-1-9	2020-1-17	64	0	0	0	1	0	0	1	1	2	0	0	0	deep caries	0	0	7	1	SSC	30	1						-	-	-	-	-			2.5	1
189	95	F	5.02466	2015-1-9	2020-1-17	65	0	1	0	1	0	1	1	1	3	0	0	0	deep caries	0	0	7	1	SSC	30	1						-	-	-	-	-			2.5	1
190	96	F	4.00274	2016-5-7	2020-5-7	54	0	0	0	0	0	0	1	0	1	0	0	0	deep caries	0	0	7	1	SSC	30	1						-	-	-	-	-			2.5	0
191	96	F	4.00274	2016-5-7	2020-5-7	55	0	1	0	0	0	0	1	0	1	0	0	0	deep caries	0	0	7	1	SSC	30	1						-	-	-	-	-			2.5	0
192	96	F	4.00274	2016-5-7	2020-5-7	74	1	0	0	1	0	0	1	1	2	0	0	0	deep caries	0	0	7	1	SSC	30	1						-	-	-	-	-			2.5	0
193	97	F	3.73699	2016-8-13	2020-5-8	65	0	1	0	0	1	1	1	1	3	0	0	0	deep caries	0	0	3	1	SSC	30	1						-	-	-	-	-			2.5	0
194	98	M	4.36986	2016-1-15	2020-5-28	54	0	0	1	1	0	0	1	1	3	0	0	0	deep caries	0	0	3	1	SSC	30	1						-	-	-	-	-			2.5	0
195	99	M	4.31507	2016-3-9	2020-7-1	55	0	1	0	1	0	1	1	1	3	0	0	0	deep caries	0	0	3	1	SSC	30	1						-	-	-	-	-			2.5	0
196	99	M	4.31507	2016-3-9	2020-7-1	85	1	1	1	0	0	0	1	1	2	0	0	0	deep caries	0	0	3	1	SSC	30	1						-	-	-	-	-			2.5	0
197	100	F	3.20548	2017-5-2	2020-7-15	74	1	0	0	1	0	0	1	1	2	0	0	0	deep caries	0	0	4	1	SSC	30	1						-	-	-	-	-			2.5	0
198	101	M	5.41096	2015-3-4	2020-7-30	55	0	1	0	0	0	0	1	0	1	0	0	0	deep caries	0	0	3	1	SSC	30	1						-	-	-	-	-			2.5	0
199	101	M	5.41096	2015-3-4	2020-7-30	84	1	0	0	1	0	0	1	1	2	0	0	0	deep caries	0	0	3	1	SSC	30	1						-	-	-	-	-			2.5	0
200	102	F	4.31507	2016-4-13	2020-8-5	64	0	0	1	1	1	0	1	1	4	0	0	0	deep caries	0	0	7	1	SSC	30	1						-	-	-	-	-			2.5	0
201	103	M	7.16164	2013-6-9	2020-8-5	64	0	0	0	1	0	0	1	1	2	0	0	0	deep caries	0	0	7	1	SSC	30	1						-	-	-	-	-			2.5	1
202	104	M	4.0274	2016-8-4	2020-8-13	85	1	1	0	0	0	0	1	0	1	0	0	0	deep caries	0	0	2	1	SSC	30	1						-	-	-	-	-			2.5	0
203	105	M	4.70137	2015-12-9	2020-8-20	54	0	0	1	1	0	0	1	1	3	0	0	0	deep caries	0	0	5	1	SSC	30	1						-	-	-	-	-			2.5	0
204	105	M	4.70137	2015-12-9	2020-8-20	55	0	1	1	1	0	0	1	1	3	0	0	0	deep caries	0	0	5	1	SSC	30	1						-	-	-	-	-			2.5	0
205	106	M	4.61644	2016-2-12	2020-9-23	54	0	0	1	1	1	0	1	1	4	0	0	0	deep caries	0	0	7	1	SSC	30	1						-	-	-	-	-			2.5	0
206	106	M	4.61644	2016-2-12	2020-9-23	75	1	1	0	1	0	0	1	1	2	0	0	0	deep caries	0	0	7	1	SSC	30	1						-	-	-	-	-			2.5	0
207	106	M	4.61644	2016-2-12	2020-9-23	85	1	1	1	0	0	0	1	1	2	0	0	0	deep caries	0	0	7	1	SSC	18	0						-	-	III°external root resorption	III°external root resorption	III°external root resorption			2.5	0
208	107	F	4.51507	2016-4-4	2020-10-8	74	1	0	0	1	1	0	1	1	3	0	0	0	deep caries	0	0	5	1	SSC	30	1						-	-	-	-	-			2.5	0
209	107	F	4.51507	2016-4-4	2020-10-8	75	1	1	0	1	1	0	1	1	3	0	0	0	deep caries	0	0	5	1	SSC	30	1						-	-	-	-	-			2.5	0
210	107	F	4.51507	2016-4-4	2020-10-8	84	1	0	1	0	0	1	1	1	3	0	0	0	deep caries	0	0	5	1	SSC	30	1						-	-	-	-	-			2.5	0
211	108	F	4.01644	2016-10-10	2020-10-15	55	0	1	0	0	0	0	1	0	1	0	0	0	deep caries	0	0	6	1	SSC	30	1						-	-	-	-	-			2.5	0
212	108	F	4.01644	2016-10-10	2020-10-15	74	1	0	1	0	1	1	1	1	4	0	0	0	deep caries	0	0	6	1	SSC	30	1						-	-	-	-	-			2.5	0
213	108	F	4.01644	2016-10-10	2020-10-15	75	1	1	0	0	0	0	1	0	1	0	0	0	deep caries	0	0	6	1	SSC	30	1						-	-	-	-	-			2.5	0
214	109	F	5.43836	2015-5-24	2020-10-29	54	0	0	1	1	0	0	1	1	3	0	0	0	deep caries	0	0	7	1	SSC	30	1						-	-	-	-	-			2.5	1
215	109	F	5.43836	2015-5-24	2020-10-29	55	0	1	1	0	0	0	1	1	2	0	0	0	deep caries	0	0	7	1	SSC	30	1						-	-	-	-	-			2.5	1
216	109	F	5.43836	2015-5-24	2020-10-29	65	0	1	0	0	0	0	1	0	1	0	0	0	deep caries	0	0	7	1	SSC	30	1						-	-	-	-	-			2.5	1
217	110	M	3.68767	2017-3-1	2020-11-6	74	1	0	1	1	0	0	1	1	3	0	0	0	deep caries	0	0	4	1	SSC	30	1						-	-	-	-	-			2.5	0
218	110	M	3.68767	2017-3-1	2020-11-6	75	1	1	0	0	1	1	1	1	3	0	0	0	deep caries	0	0	4	1	SSC	30	1						-	-	-	-	-			2.5	0
219	111	M	6.95616	2013-11-29	2020-11-11	84	1	0	0	1	0	0	1	1	2	0	0	0	deep caries	0	0	3	1	SSC	30	1						-	-	-	-	pulp canal obliteration			2.5	0
220	112	F	3.73973	2017-2-22	2020-11-18	74	1	0	0	1	0	0	1	1	2	0	0	0	deep caries	0	0	3	1	SSC	30	1						-	-	-	-	-			2.5	0
221	113	M	3.90685	2015-8-16	2019-7-12	54	0	0	0	1	0	0	1	1	2	0	0	0	deep caries	0	0	2	1	SSC	36	1						-	-	-	-	-	-		3	0
222	114	F	2.35068	2017-3-18	2019-7-24	54	0	0	0	0	0	0	1	0	1	0	0	0	deep caries	0	0	2	1	SSC	36	1						-	-	-	-	-	-		3	0
223	114	F	2.35068	2017-3-18	2019-7-24	64	0	0	0	0	0	0	1	0	1	0	0	0	deep caries	0	0	2	1	SSC	36	1						-	-	-	-	-	-		3	0
224	115	M	5.50959	2014-1-20	2019-7-24	65	0	1	1	0	0	0	1	1	2	0	0	0	deep caries	0	0	2	1	SSC	36	1						-	-	-	pulp canal obliteration	pulp canal obliteration	pulp canal obliteration		3	0
225	116	M	5.58904	2014-1-26	2019-8-28	74	1	0	1	1	0	0	1	1	3	0	0	0	deep caries	0	0	4	1	SSC	36	1						-	-	-	-	-	-		3	0
226	116	M	5.58904	2014-1-26	2019-8-28	84	1	0	1	1	0	0	1	1	3	0	0	0	deep caries	0	0	4	1	SSC	36	1						-	-	-	-	-	-		3	0
227	117	M	4.84932	2014-11-1	2019-9-6	55	0	1	1	0	0	0	1	1	2	0	0	0	deep caries	0	0	2	1	SSC	36	1						-	-	-	-	-	-		3	0
228	117	M	4.84932	2014-11-1	2019-9-6	74	1	0	0	1	0	0	1	1	2	0	0	0	deep caries	0	0	2	1	SSC	36	1						-	-	-	-	-	-		3	0
229	117	M	4.84932	2014-11-1	2019-9-6	84	1	0	0	1	0	0	1	1	2	0	0	0	deep caries	0	0	2	1	SSC	36	1						-	-	-	-	-	-		3	0
230	118	F	5.50411	2014-3-12	2019-9-11	54	0	0	0	1	0	0	1	1	2	0	0	0	deep caries	0	0	5	1	SSC	36	1						-	-	-	-	-	-		3	0
231	118	F	5.50411	2014-3-13	2019-9-12	55	0	1	1	0	0	0	1	1	2	0	0	0	deep caries	0	0	5	1	SSC	18	0	2021-05-24	chronic periapical periodontitis	0	+	fistula	-	-	chronic periapical periodontitis					3	0
232	118	F	5.50411	2014-3-14	2019-9-13	64	0	0	0	1	0	0	1	1	2	0	0	0	deep caries	0	0	5	1	SSC	36	1						-	-	-	-	-	-		3	0
233	118	F	5.50411	2014-3-15	2019-9-14	84	1	0	0	1	0	0	1	1	2	0	0	0	deep caries	0	0	5	1	SSC	36	1						-	-	-	-	-	-		3	0
234	119	F	5.50411	2014-3-21	2019-9-20	74	1	0	0	1	0	0	1	1	2	0	0	0	deep caries	0	0	5	1	SSC	36	1						-	-	-	-	-	-		3	0
235	120	F	5.02466	2014-9-17	2019-9-25	65	0	1	1	0	0	1	1	1	3	0	0	0	deep caries	0	0	4	1	SSC	36	1						-	-	-	-	-	-		3	0
236	120	F	5.02466	2014-9-17	2019-9-25	75	1	1	1	0	1	1	1	1	4	0	0	0	deep caries	0	0	4	1	SSC	36	1						-	-	-	-	-	-		3	0
237	121	M	6.25479	2013-6-26	2019-9-26	75	1	1	1	0	0	0	1	1	2	0	0	0	deep caries	0	0	6	1	SSC	36	1						-	-	-	-	-	-		3	1
238	122	M	5.67945	2014-1-25	2019-9-29	54	0	0	0	1	0	0	1	1	2	0	0	0	deep caries	0	0	2	1	SSC	36	1						-	-	-	-	-	-		3	0
239	122	M	5.67945	2014-1-25	2019-9-29	64	0	0	1	1	0	0	1	1	3	0	0	0	deep caries	0	0	2	1	SSC	36	1						-	-	-	-	-	-		3	0
240	122	M	5.67945	2014-1-25	2019-9-29	65	0	1	1	0	0	0	1	1	2	0	0	0	deep caries	0	0	2	1	SSC	36	0	2022-10-22	premature loss of primary molars				-	-	-	-	-	premature loss of primary molars		3	0
241	123	M	3.74247	2016-2-4	2019-11-1	74	1	0	0	1	0	0	1	1	2	0	0	0	deep caries	0	0	2	1	SSC	36	1						-	-	-	-	-	-		3	0
242	124	F	5.84658	2014-1-3	2019-11-7	54	0	0	0	1	1	0	1	1	3	0	0	0	deep caries	0	0	7	1	SSC	36	1						-	-	-	-	-	-		3	0
243	124	F	5.84658	2014-1-3	2019-11-7	55	0	1	1	0	0	1	1	1	3	0	0	0	deep caries	0	0	7	1	SSC	36	1						-	-	-	-	-	-		3	0
244	124	F	5.84658	2014-1-3	2019-11-7	85	1	1	1	0	1	1	1	1	4	0	0	0	deep caries	0	0	7	1	SSC	36	1						-	-	-	-	-	pulp canal obliteration		3	0
245	125	M	4.27123	2015-8-2	2019-11-8	54	0	0	0	1	0	0	1	1	2	0	0	0	deep caries	0	0	2	1	SSC	36	1						-	-	-	-	-	-		3	0
246	125	M	4.27123	2015-8-2	2019-11-8	85	1	1	0	0	1	0	1	1	2	0	0	0	deep caries	0	0	2	1	SSC	36	1						-	-	-	-	-	-		3	0
247	126	M	3.6137	2016-4-10	2019-11-20	84	1	0	0	0	0	0	1	0	1	0	0	0	deep caries	0	0	3	1	SSC	36	1						-	-	-	-	-	-		3	0
248	127	M	5.10685	2014-10-20	2019-11-27	55	0	1	1	0	0	1	1	1	3	0	0	0	deep caries	0	0	2	1	SSC	36	1						-	-	-	-	-	-		3	0
249	127	M	5.10685	2014-10-20	2019-11-27	65	0	1	1	1	1	1	1	1	5	0	0	0	deep caries	0	0	2	1	SSC	36	1						-	-	-	-	-	pulp canal obliteration		3	0
250	127	M	5.10685	2014-10-20	2019-11-27	84	1	0	0	1	0	0	1	1	2	0	0	0	deep caries	0	0	2	1	SSC	36	1						-	-	-	-	-	pulp canal obliteration		3	0
251	127	M	5.10685	2014-10-20	2019-11-27	85	1	1	1	0	1	0	1	1	3	0	0	0	deep caries	0	0	2	1	SSC	36	1						-	-	-	-	-	pulp canal obliteration		3	0
252	128	M	5.75342	2014-3-14	2019-12-13	64	0	0	0	1	0	0	1	1	2	0	0	0	deep caries	0	0	7	1	SSC	36	1						-	-	-	-	-	-		3	1
253	128	M	5.75342	2014-3-14	2019-12-13	85	1	1	1	0	0	0	1	1	2	0	0	0	deep caries	0	0	7	1	SSC	36	1						-	-	-	-	-	-		3	1
254	129	M	2.92055	2017-1-16	2019-12-18	84	1	0	1	1	0	1	1	1	4	0	0	0	deep caries	0	0	4	1	SSC	36	1						-	-	pulp canal obliteration	pulp canal obliteration	pulp canal obliteration	pulp canal obliteration		3	0
255	130	M	4.02192	2015-12-12	2019-12-19	54	0	0	1	1	1	0	1	1	4	0	0	0	deep caries	0	0	3	1	SSC	36	1						-	-	-	-	-	-		3	0
256	130	M	4.02192	2015-12-12	2019-12-19	64	0	0	1	1	1	0	1	1	4	0	0	0	deep caries	0	0	3	1	SSC	36	1						-	-	-	-	-	pulp canal obliteration		3	0
257	131	F	4.9726	2015-1-21	2020-1-10	85	1	1	0	0	0	0	1	0	1	0	0	0	deep caries	0	0	2	1	SSC	36	1						-	-	-	-	-	-		3	0
258	132	M	5.40274	2014-8-23	2020-1-16	64	0	0	1	1	0	0	1	1	3	0	0	0	deep caries	0	0	7	1	SSC	36	1						-	-	-	-	-	-		3	0
259	132	M	5.40274	2014-8-23	2020-1-16	65	0	1	1	0	0	0	1	1	2	0	0	0	deep caries	0	0	7	1	SSC	36	1						-	-	-	-	-	-		3	0
260	133	M	5.51507	2014-7-14	2020-1-17	85	1	1	1	0	1	0	0	1	2	0	0	0	deep caries	0	0	5	1	SSC	36	1						-	-	-	-	-	-		3	1
261	134	F	6.29315	2014-1-21	2020-5-6	84	1	0	0	1	0	0	1	1	2	0	0	0	deep caries	0	0	7	1	SSC	36	1						-	-	-	-	-	-		3	1
262	135	M	4.06575	2016-4-29	2020-5-22	54	0	0	0	1	1	0	1	1	3	0	0	0	deep caries	0	0	5	1	SSC	36	1						-	-	-	-	-	-		3	0
263	135	M	4.06575	2016-4-29	2020-5-22	64	0	0	1	1	1	0	0	1	3	0	0	0	deep caries	0	0	5	1	SSC	36	1						-	-	-	-	-	-		3	0
264	135	M	4.06575	2016-4-29	2020-5-22	74	1	0	1	1	1	0	0	1	3	0	0	0	deep caries	0	0	5	1	SSC	36	1						-	-	-	-	-	-		3	0
265	135	M	4.06575	2016-4-29	2020-5-22	84	1	0	0	1	1	0	1	1	3	0	0	0	deep caries	0	0	5	1	SSC	36	1						-	-	-	-	-	-		3	0
266	136	M	5.86027	2014-7-21	2020-5-29	65	0	1	1	0	0	0	1	1	2	0	0	0	deep caries	0	0	3	1	SSC	36	1						-	-	-	-	-	-		3	0
267	137	M	4.4411	2015-12-21	2020-5-29	65	0	1	0	0	0	0	1	0	1	0	0	0	deep caries	0	0	3	1	SSC	36	1						-	-	-	-	-	-		3	0
268	138	M	3.10685	2017-6-1	2020-7-9	74	1	0	1	1	1	1	1	1	5	0	0	0	deep caries	0	0	2	1	SSC	36	1						-	-	-	-	-	-		3	0
269	138	M	3.10685	2017-6-1	2020-7-9	75	1	1	1	0	0	0	1	1	2	0	0	0	deep caries	0	0	2	1	SSC	36	1						-	-	-	-	-	-		3	0
270	139	M	5.70137	2014-11-12	2020-7-24	65	0	1	1	0	0	1	1	1	3	0	0	0	deep caries	0	0	2	1	SSC	36	1						-	-	-	-	-	-		3	0
271	140	F	5.68219	2014-12-10	2020-8-14	55	0	1	0	0	0	0	1	0	1	0	0	0	deep caries	0	0	5	1	SSC	36	1						-	-	-	-	-	-		3	0
272	140	F	5.68219	2014-12-10	2020-8-14	64	0	0	0	1	0	0	1	1	2	0	0	0	deep caries	0	0	5	1	SSC	36	1						-	-	-	-	-	-		3	0
273	141	M	6.36986	2013-2-28	2019-7-12	65	0	1	1	0	0	1	1	1	3	0	0	0	deep caries	0	0	5	1	SSC	42	1						-	-	-	-	-	-	-	3.5	0
274	142	M	3.15068	2016-6-13	2019-8-7	54	0	0	1	1	1	1	1	1	5	0	0	0	deep caries	0	0	6	1	SSC	42	1						-	-	-	-	-	-	-	3.5	0
275	143	M	5.70137	2013-12-18	2019-8-30	74	1	0	0	1	0	0	1	1	2	0	0	0	deep caries	0	0	2	1	SSC	42	1						-	-	-	-	-	-	-	3.5	0
276	144	M	7.89315	2011-10-23	2019-9-12	54	0	0	1	0	0	0	1	1	2	0	0	0	deep caries	0	0	7	1	SSC	42	1						-	-	-	-	-	-	-	3.5	0
277	145	F	3.66027	2016-1-29	2019-9-26	75	1	1	1	1	1	1	1	1	5	0	0	0	deep caries	0	0	7	1	SSC	42	0						-	-	-	-	-	-	III°external root resorption；II°root furcation shadow	3.5	0
278	146	M	4.19726	2015-7-20	2019-9-29	74	1	0	0	0	0	0	1	0	1	0	0	0	deep caries	0	0	4	1	SSC	42	1						-	-	-	-	-	-	-	3.5	0
279	146	M	4.19726	2015-7-20	2019-9-29	75	1	1	1	0	0	0	1	1	2	0	0	0	deep caries	0	0	4	1	SSC	42	1						-	-	-	-	-	-	-	3.5	0
280	146	M	4.19726	2015-7-20	2019-9-29	84	1	0	1	1	0	0	1	1	3	0	0	0	deep caries	0	0	4	1	SSC	42	1						-	-	-	-	-	-	-	3.5	0
281	147	F	4.21096	2015-7-25	2019-10-9	54	0	0	0	1	0	0	1	1	2	0	0	0	deep caries	0	0	4	1	SSC	42	1						-	-	-	-	-	-	-	3.5	0
282	147	F	4.21096	2015-7-25	2019-10-9	64	0	0	0	1	0	0	1	1	2	0	0	0	deep caries	0	0	4	1	SSC	42	1						-	-	-	-	-	-	-	3.5	0
283	147	F	4.21096	2015-7-25	2019-10-9	74	1	0	0	1	0	0	1	1	2	0	0	0	deep caries	0	0	4	1	SSC	42	1						-	-	-	-	-	-	-	3.5	0
284	147	F	4.21096	2015-7-25	2019-10-9	75	1	1	0	1	0	0	1	1	2	0	0	0	deep caries	0	0	4	1	SSC	42	1						-	-	-	-	-	-	-	3.5	0
285	147	F	4.21096	2015-7-25	2019-10-9	84	1	0	0	1	0	0	1	1	2	0	0	0	deep caries	0	0	4	1	SSC	42	1						-	-	-	-	-	-	-	3.5	0
286	148	F	2.9726	2016-10-27	2019-10-17	85	1	1	1	1	1	1	1	1	5	0	0	0	deep caries	0	0	4	1	SSC	42	1						-	-	-	-	-	-	pulp canal obliteration	3.5	0
287	149	M	5.41644	2014-5-20	2019-10-18	65	0	1	0	0	0	0	1	0	1	0	0	0	deep caries	0	0	4	1	SSC	42	1						-	-	-	-	-	-	-	3.5	0
288	150	M	4.73425	2015-1-29	2019-10-23	64	0	0	1	0	0	0	1	1	2	0	0	0	deep caries	0	0	7	1	SSC	42	1						-	-	-	-	-	-	-	3.5	0
289	150	M	4.73425	2015-1-29	2019-10-23	75	1	1	1	0	1	0	1	1	3	0	0	0	deep caries	0	0	7	1	SSC	42	1						-	-	-	-	-	-	-	3.5	0
290	150	M	4.73425	2015-1-29	2019-10-23	85	1	1	1	0	0	0	1	1	2	0	0	0	deep caries	0	0	7	1	SSC	42	1						-	-	-	-	-	-	-	3.5	0
291	151	M	5.05205	2014-10-12	2019-10-30	74	1	0	0	1	0	0	1	1	2	0	0	0	deep caries	0	0	2	1	SSC	42	1						-	-	-	-	-	-	-	3.5	0
292	151	M	5.05205	2014-10-12	2019-10-30	75	1	1	1	1	1	1	1	1	5	0	0	0	deep caries	0	0	2	1	SSC	42	0	2023-04-23	chronic periapical periodontitis	0	±	-	-	-	-	-	-	-	chronic periapical periodontitis	3.5	0
293	152	F	5.48219	2014-5-23	2019-11-14	54	0	0	1	0	1	0	0	1	2	0	0	0	deep caries	0	0	2	1	SSC	42	1						-	-	-	-	-	-	-	3.5	0
294	152	F	5.48219	2014-5-23	2019-11-14	55	0	1	1	0	0	1	1	1	3	0	0	0	deep caries	0	0	2	1	SSC	42	1						-	-	-	-	-	-	-	3.5	0
295	152	F	5.48219	2014-5-23	2019-11-14	65	0	1	1	0	1	0	1	1	3	0	0	0	deep caries	0	0	2	1	SSC	42	1						-	-	-	-	-	-	-	3.5	0
296	152	F	5.48219	2014-5-23	2019-11-14	84	1	0	0	1	1	0	1	1	3	0	0	0	deep caries	0	0	2	1	SSC	42	1						-	-	-	-	-	-	pulp canal obliteration	3.5	0
297	153	F	3.55068	2016-5-12	2019-11-29	54	0	0	0	1	1	0	1	1	3	0	0	0	deep caries	0	0	2	1	SSC	42	1						-	-	-	-	-	-	-	3.5	0
