# Supplementary material for: Comparison of iRoot BP Plus and mineral trioxide aggregate for pulpotomy in primary molars under general anesthesia: a 3-year retrospective study
Source: PeerJ. 2024 Nov 12;12:e18453. doi: 10.7717/peerj.18453 (PMC11566509; doi:10.7717/peerj.18453)
Supplement: Data S2 — The patient information after propensity score matching, which minimizes selection bias and enhances comparability between groups. Subsequent efficacy evaluations of the two materials are performed based on this refined dataset. [file peerj-12-18453-s002.xlsx]

## Sheet: MTA
	basic patient information								decayed tooth surfaces							examination records				image records		treatment information			survival time	status	follow-up
sample number	patient number	gender	age	date of birth	date of treatment	tooth position	maxillary or mandibular tooth	first primary molar or second primary molar	mesial surface	distal surface	buccal surface	lingual surface	occlusal caries	axial caries	number of decayed tooth surfaces	gingival tissues	tooth mobility	perforation of pulp chamber	diagnosis	root resorption	furcation lesions	dentist	material	crown restoration			date of retreatment	diagnosis	tooth mobility	pain on percusion	gingival tissues	6 months	12 months	18 months	24 months	30 months	36 months	42 months	follow-up(year)	Normal replacement of teeth
		F-female; M-male	Directly recording precise age: For example, 2.50 means 2 and a half years old, and 7.75 means 7 years and 9 months old.	year-month-day	year-month-day	FDI World Dental Federation notation	0-maxillary teeth；1-mandibular teeth	0-first primary molar；1-second primary molar	0-no; 1-yes	0-no; 1-yes	0-no; 1-yes	0-no; 1-yes	0-no; 1-yes	Mesial or distal or buccal or lingual surface: 0-no; 1-yes		0-No abnormality	0-(physiological)≤1mm; I-(physiological)>1 mm, but<2 mm; II->2 mm, but<3 mm; III-≥3mm	0-No abnormality		0-No abnormality; 1-Surface resorption; 2-Mid-root resorption; 3-Extensive root resorption	0-No abnormality;1-Density changes	1-dentist 1;2-dentist 2...	0-MTA;1-iRoot BP Plus	SSC-Stainless Steel Crown	(months)	fail-0；success-1	year-month-day	"-"means that no clinical examination abnormalities were found during follow-up	0-(physiological)≤1mm; I-(physiological)>1 mm, but<2 mm; II->2 mm, but<3 mm; III-≥3mm	“-” Negative；“±” weak positive；“＋”positive	"-"means no abnormalities	"-"means no radiographic abnormalities were observed; I°external root resorption-Surface resorption; II°external root resorption-Mid-root resorption; III°external root resorption-Extensive root resorption; I°root furcation shadow-Inter-radicular trabeculation or variation in radiodensity;II°root furcation shadow-Minor inter-radicular radiolucency with trabeculation still present;III°root furcatio…							(year)	0-No tooth replacement occurred during the observation period； 1-Normal replacement of teeth
1	1	F	4.32055	2015-5-20	2019-9-13	84	1	0	0	1	1	0	0	1	2	0	0	0	deep caries	0	0	1	0	SSC	42	1						-	-	-	-	-	-	-	3.5	0
2	2	M	4.25205	2015-4-13	2019-7-13	75	1	1	1	0	0	0	1	1	2	0	0	0	deep caries	0	0	4	0	SSC	42	1		-				-	-	-	-	-	-	-	3.5	0
3	2	M	4.25205	2015-4-13	2019-7-13	55	0	1	0	0	0	1	1	1	2	0	0	0	deep caries	0	0	4	0	SSC	42	1		-				-	-	-	-	-	-	-	3.5	0
4	3	M	3.48767	2015-11-28	2019-5-24	54	0	0	0	0	0	0	1	0	1	0	0	0	deep caries	0	0	4	0	SSC	42	1		-				-	-	-	-	-	-	-	3.5	0
5	4	M	4.26849	2015-8-5	2019-11-10	65	0	1	1	0	0	0	1	1	2	0	0	0	deep caries	0	0	4	0	SSC	42	1		-				-	-	-	-	-	-	-	3.5	0
6	5	F	3.64384	2016-5-9	2019-12-29	75	1	1	0	0	0	0	1	0	1	0	0	0	deep caries	0	0	7	0	SSC	42	1		-				-	-	-	-	-	-	-	3.5	0
7	6	F	3.70137	2016-4-11	2019-12-22	55	0	1	1	0	0	0	1	1	2	0	0	0	deep caries	0	0	1	0	SSC	24	0	2021-12-31	chronic periapical periodontitis	II	-	redness and swelling	-	-	II°external root resorption;III°root furcation shadow	II°external root resorption;III°root furcation shadow	II°external root resorption;III°root furcation shadow	II°external root resorption;III°root furcation shadow	II°external root resorption;III°root furcation shadow	3.5	0
8	7	F	4.0137	2015-8-26	2019-8-30	65	0	1	0	0	0	1	1	1	2	0	0	0	deep caries	0	0	6	0	SSC	42	1						-	-	-	-	-	-	-	3.5	0
9	8	F	6.27123	2013-3-16	2019-6-21	74	1	0	0	0	0	0	1	0	1	0	0	0	deep caries	0	0	7	0	SSC	42	0	2022-08-23	chronic periapical periodontitis	II	-	fistula	-	-	-	-	-	-	II°external root resorption; II°root furcation shadow	3.5	0
10	9	M	4.55342	2014-11-18	2019-6-7	55	0	1	0	1	0	0	1	1	2	0	0	0	deep caries	0	0	7	0	SSC	42	1		-				-	-	-	-	-	-	-	3.5	0
11	10	F	5.24932	2014-6-10	2019-9-7	65	0	1	0	0	1	0	1	1	2	0	0	0	deep caries	0	0	1	0	SSC	36	0	2022-09-11	chronic periapical periodontitis	I	-	-	-	-	-	-	-	II°external root resorption		3.5	0
12	10	F	5.24932	2014-6-10	2019-9-7	64	0	0	0	0	0	0	1	0	1	0	0	0	deep caries	0	0	1	0	SSC	24	0	2021-02-13	chronic periapical periodontitis	I	-	pustules	-	-	-	-	-	II°external root resorption		3.5	0
13	10	F	5.24932	2014-6-10	2019-9-7	55	0	1	0	0	0	1	1	1	2	0	0	0	deep caries	0	0	1	0	SSC	42	1						-	-	-	-	-	-	-	3.5	0
14	11	M	3.60822	2016-5-22	2019-12-30	64	0	0	0	1	0	0	1	1	2	0	0	0	deep caries	0	0	7	0	SSC	42	1		-				-	-	-	-	-	-	-	3.5	0
15	12	M	5.83288	2014-1-5	2019-11-4	85	1	1	0	0	1	0	1	1	2	0	0	0	deep caries	0	0	7	0	SSC	42	1		-				-	-	-	-	Dentin bridge	Dentin bridge	Dentin bridge	3.5	0
16	13	F	4.99726	2014-8-14	2019-8-12	65	0	1	1	0	0	0	1	1	2	0	0	0	deep caries	0	0	7	0	SSC	42	1		-				-	-	-	-	-	-	-	3.5	0
17	14	M	4.63288	2014-9-26	2019-5-14	65	0	1	1	1	0	0	1	1	3	0	0	0	deep caries	0	0	1	0	SSC	42	1		-				-	-	-	-	-	-	-	3.5	1
18	15	M	2.15068	2017-9-8	2019-11-1	74	1	0	0	0	0	0	1	0	1	0	0	0	deep caries	0	0	7	0	SSC	42	1		-				-	-	-	-	-	-	-	3.5	0
19	15	M	2.15068	2017-9-8	2019-11-1	64	0	0	0	0	0	0	1	0	1	0	0	0	deep caries	0	0	7	0	SSC	42	1		-				-	-	-	-	-	-	-	3.5	0
20	15	M	2.15068	2017-9-8	2019-11-1	54	0	0	0	0	0	0	1	0	1	0	0	0	deep caries	0	0	7	0	SSC	42	1		-				-	-	-	-	-	-	-	3.5	0
21	16	F	4.71507	2014-12-28	2019-9-14	64	0	0	0	0	0	0	1	0	1	0	0	0	deep caries	0	0	7	0	SSC	42	1		-				-	-	-	-	-	-	-	3.5	0
22	17	F	5.25205	2013-10-6	2019-1-4	55	0	1	1	0	0	0	1	1	2	0	0	0	deep caries	0	0	1	0	SSC	42	1	2022-05-26	deep caries after pulpotomy	0	-	-	-	-	-	-	-	-		3.5	0
23	18	M	6.80274	2013-1-5	2019-10-24	85	1	1	1	0	0	0	1	1	2	0	0	0	deep caries	0	0	7	0	SSC	36	1	2022-11-14	pericoronitis	0	-	redness and swelling	-	-	-	-	-	-	-	3	0
24	18	M	6.80274	2013-1-5	2019-10-24	75	1	1	1	0	0	0	1	1	2	0	0	0	deep caries	0	0	7	0	SSC	36	1		-				-	-	-	-	-	-		3	0
25	18	M	6.80274	2013-1-5	2019-10-24	74	1	0	0	1	0	0	1	1	2	0	0	0	deep caries	0	0	7	0	SSC	36	1		-				-	-	-	-	-	-		3	0
26	19	F	3.59178	2015-11-30	2019-7-3	65	0	1	0	0	1	0	1	1	2	0	0	0	deep caries	0	0	3	0	SSC	36	1		-				-	-	-	-	-	-		3	0
27	20	F	2.67671	2016-10-23	2019-6-27	74	1	0	0	1	0	0	1	1	2	0	0	0	deep caries	0	0	1	0	SSC	36	1		-				-	-	-	-	-	-		3	0
28	21	M	4.44658	2015-5-22	2019-10-31	85	1	1	1	0	0	0	1	1	2	0	0	0	deep caries	0	0	3	0	SSC	36	1		-				-	-	-	-	-	-		3	0
29	21	M	4.44658	2015-5-22	2019-10-31	55	0	1	1	0	0	0	1	1	2	0	0	0	deep caries	0	0	3	0	SSC	36	1		-				-	-	-	-	-	-		3	0
30	22	M	4.63836	2015-3-6	2019-10-24	55	0	1	1	0	0	0	1	1	2	0	0	0	deep caries	0	0	3	0	SSC	12	0	2020-05-06	chronic periapical periodontitis	0	±	pustules	-	-	-	-	-	-		3	0
31	23	M	4.80822	2014-10-11	2019-8-1	54	0	0	0	1	0	0	1	1	2	0	0	0	deep caries	0	0	3	0	SSC	36	1		-				-	-	-	-	-	-		3	0
32	24	F	4.1589	2015-4-3	2019-5-30	84	1	0	0	0	0	0	1	0	1	0	0	0	deep caries	0	0	3	0	SSC	36	1		-				-	-	pulp canal obliteration	pulp canal obliteration	pulp canal obliteration	pulp canal obliteration		3	0
33	24	F	4.1589	2015-4-3	2019-5-30	74	1	0	0	0	0	0	1	0	1	0	0	0	deep caries	0	0	3	0	SSC	36	1		-				-	-	pulp canal obliteration	pulp canal obliteration	pulp canal obliteration	pulp canal obliteration		3	0
34	25	F	3.17534	2016-3-9	2019-5-11	85	1	1	0	0	0	0	1	0	1	0	0	0	deep caries	0	0	3	0	SSC	36	1		-				-	-	-	-	-	pulp canal obliteration		3	0
35	25	F	3.17534	2016-3-9	2019-5-11	75	1	1	0	0	1	0	1	1	2	0	0	0	deep caries	0	0	3	0	SSC	36	1		-				-	-	-	-	-	-		3	0
36	25	F	3.17534	2016-3-9	2019-5-11	64	0	0	0	0	1	0	1	1	2	0	0	0	deep caries	0	0	3	0	SSC	36	1		-				-	-	-	-	-	-		3	0
37	26	F	4.41644	2014-12-10	2019-5-10	55	0	1	0	0	0	0	1	0	1	0	0	0	deep caries	0	0	3	0	SSC	36	1		-				-	-	-	-	-	pulp canal obliteration		3	0
38	27	M	4.59452	2014-9-16	2019-4-20	84	1	0	0	1	0	0	1	1	2	0	0	0	deep caries	0	0	7	0	SSC	12	0						-	II° external root resorption；I°root furcation shadow	II° external root resorption；I°root furcation shadow	II° external root resorption(distal root)，pulp canal obliteration	II° external root resorption(distal root)，pulp canal obliteration	II° external root resorption(distal root)，pulp canal obliteration		3	0
39	28	F	5.04658	2014-4-3	2019-4-19	85	1	1	1	0	0	0	1	1	2	0	0	0	deep caries	0	0	3	0	SSC	36	1		-				-	-	-	-	-	-		3	0
40	28	F	5.04658	2014-4-3	2019-4-19	74	1	0	0	1	0	0	1	1	2	0	0	0	deep caries	0	0	3	0	SSC	36	0	2022-07-12	chronic periapical periodontitis	I	±	pustules	I°root furcation shadow	I°root furcation shadow	-	-	-	III°root furcation shadow		3	0
41	29	M	5.7863	2013-7-6	2019-4-18	55	0	1	0	0	0	1	1	1	2	0	0	0	deep caries	0	0	3	0	SSC	12	0						-	II°external root resorption	III°external root resorption(Mesial root)，pulp canal obliteration(palatal root)	III°external root resorption(Mesial root)，pulp canal obliteration(palatal root)	III°external root resorption(Mesial root)，pulp canal obliteration(palatal root)	III°external root resorption		3	0
42	30	M	2.68493	2016-8-6	2019-4-12	84	1	0	0	0	0	0	1	0	1	0	0	0	deep caries	0	0	3	0	SSC	36	1		-				-	-	-	-	-	-		3	0
43	30	M	2.68493	2016-8-6	2019-4-12	75	1	1	0	0	1	0	1	1	2	0	0	0	deep caries	0	0	3	0	SSC	36	1		-				-	-	-	-	-	-		3	0
44	31	M	3.81918	2016-2-18	2019-12-13	75	1	1	0	0	0	1	1	1	2	0	0	0	deep caries	0	0	1	0	SSC	36	1		-				-	-	-	-	-	-		3	0
45	32	M	7.04658	2012-10-3	2019-10-18	65	0	1	1	0	0	1	1	1	3	0	0	0	deep caries	0	0	3	0	SSC	36	1		-				-	-	-	-	-	-		3	0
46	32	M	7.04658	2012-10-3	2019-10-18	55	0	1	1	0	0	1	1	1	3	0	0	0	deep caries	0	0	3	0	SSC	36	1		-				-	-	-	-	-	-		3	0
47	33	M	4.00822	2015-9-26	2019-9-28	85	1	1	1	0	0	0	1	1	2	0	0	0	deep caries	0	0	3	0	SSC	36	1		-				-	-	-	-	-	-		3	0
48	34	M	4.44384	2015-4-19	2019-9-27	84	1	0	0	0	0	0	1	0	1	0	0	0	deep caries	0	0	7	0	SSC	36	1		-				-	-	-	-	-	-		3	0
49	35	F	6.98904	2012-9-12	2019-9-6	85	1	1	1	0	0	0	1	1	2	0	0	0	deep caries	0	0	7	0	SSC	36	1		-				-	-	-	-	-	-		3	1
50	35	F	6.98904	2012-9-12	2019-9-6	84	1	0	0	1	0	0	1	1	2	0	0	0	deep caries	0	0	7	0	SSC	36	1		-				-	-	-	-	-	-		3	1
51	36	M	3.93973	2015-9-9	2019-8-17	75	1	1	1	0	0	0	1	1	2	0	0	0	deep caries	0	0	7	0	SSC	36	1		-				-	-	-	-	-	-		3	0
52	37	M	5.42466	2014-1-26	2019-6-28	65	0	1	1	0	0	0	1	1	2	0	0	0	deep caries	0	0	7	0	SSC	36	1		-				-	-	-	-	-	-		3	0
53	37	M	5.42466	2014-1-26	2019-6-28	55	0	1	0	1	0	1	1	1	3	0	0	0	deep caries	0	0	7	0	SSC	36	1		-				-	-	-	-	-	-		3	0
54	38	M	3.85479	2015-8-8	2019-6-15	85	1	1	0	1	0	0	1	1	2	0	0	0	deep caries	0	0	7	0	SSC	36	1		-				-	-	-	-	-	pulp canal obliteration		3	0
55	38	M	3.85479	2015-8-8	2019-6-15	74	1	0	1	0	0	0	1	1	2	0	0	0	deep caries	0	0	7	0	SSC	36	1		-				-	-	-	-	-	-		3	0
56	38	M	3.85479	2015-8-8	2019-6-15	54	0	0	1	0	1	0	1	1	3	0	0	0	deep caries	0	0	7	0	SSC	36	1		-				-	-	-	-	-	-		3	0
57	39	M	4.39178	2014-11-29	2019-4-20	84	1	0	0	1	0	0	1	1	2	0	0	0	deep caries	0	0	1	0	SSC	36	1		-				-	-	-	-	-	-		3	0
58	40	F	4.3589	2014-11-27	2019-4-6	64	0	0	0	1	0	0	1	1	2	0	0	0	deep caries	0	0	7	0	SSC	36	1		-				-	-	-	-	-	-		3	0
59	40	F	4.3589	2014-11-27	2019-4-6	55	0	1	1	0	1	0	1	1	3	0	0	0	deep caries	0	0	7	0	SSC	36	1		-				-	-	-	-	-	-		3	0
60	41	F	4.66849	2014-6-25	2019-2-23	65	0	1	1	0	0	1	1	1	3	0	0	0	deep caries	0	0	7	0	SSC	36	1		-				-	-	-	-	-	-		3	0
61	42	F	4.20274	2015-10-16	2019-12-28	64	0	0	0	0	1	0	1	1	2	0	0	0	deep caries	0	0	7	0	SSC	36	1		-				-	-	-	-	-	-		3	0
62	43	F	4.81918	2015-2-13	2019-12-7	65	0	1	1	0	1	0	1	1	3	0	0	0	deep caries	0	0	7	0	SSC	36	1		-				-	-	-	-	-	-		3	0
63	43	F	4.81918	2015-2-13	2019-12-7	64	0	0	0	1	0	0	1	1	2	0	0	0	deep caries	0	0	7	0	SSC	36	1		-				-	-	-	-	-	-		3	0
64	43	F	4.81918	2015-2-13	2019-12-7	55	0	1	0	0	0	0	1	0	1	0	0	0	deep caries	0	0	7	0	SSC	36	1		-				-	-	-	-	-	-		3	0
65	44	M	6.08767	2013-11-1	2019-12-1	64	0	0	0	1	0	0	1	1	2	0	0	0	deep caries	0	0	1	0	SSC	36	1		-				-	-	-	-	-	-		3	0
66	45	F	4.83014	2014-9-15	2019-7-13	84	1	0	0	1	0	0	1	1	2	0	0	0	deep caries	0	0	7	0	SSC	36	1		-				-	-	-	-	-	-		3	0
67	45	F	4.83014	2014-9-15	2019-7-13	75	1	1	0	0	1	0	1	1	2	0	0	0	deep caries	0	0	7	0	SSC	36	1		-				-	-	-	-	-	-		3	0
68	45	F	4.83014	2014-9-15	2019-7-13	74	1	0	1	0	0	0	1	1	2	0	0	0	deep caries	0	0	7	0	SSC	36	1		-				-	-	-	-	-	-		3	0
69	45	F	4.83014	2014-9-15	2019-7-13	65	0	1	1	0	0	0	1	1	2	0	0	0	deep caries	0	0	7	0	SSC	36	1		-				-	-	-	-	-	-		3	0
70	46	F	2.74521	2016-6-25	2019-3-23	54	0	0	0	0	0	1	1	1	2	0	0	0	deep caries	0	0	7	0	SSC	36	1		-				-	-	-	-	-	-		3	0
71	47	F	5.61644	2013-6-18	2019-1-28	65	0	1	1	0	0	1	1	1	3	0	0	0	deep caries	0	0	7	0	SSC	36	1		-				-	-	-	-	-	-		3	1
72	48	M	4.52055	2015-6-18	2019-12-24	65	0	1	1	0	0	1	1	1	3	0	0	0	deep caries	0	0	7	0	SSC	36	1		-				-	-	-	-	-	-		3	0
73	49	F	3.59726	2016-5-12	2019-12-16	64	0	0	1	1	1	0	0	1	3	0	0	0	deep caries	0	0	1	0	SSC	36	1		-				-	-	-	-	-	-		3	0
74	50	F	3.70959	2016-3-25	2019-12-9	65	0	1	1	1	0	0	1	1	3	0	0	0	deep caries	0	0	4	0	SSC	36	1		-				-	-	-	-	-	-		3	0
75	51	M	3.45205	2016-2-23	2019-8-6	64	0	0	1	1	1	0	1	1	4	0	0	0	deep caries	0	0	7	0	SSC	36	1		-				-	-	-	-	-	-		3	0
76	51	M	3.45205	2016-2-23	2019-8-6	54	0	0	0	1	0	0	1	1	2	0	0	0	deep caries	0	0	7	0	SSC	36	1		-				-	-	-	-	-	-		3	0
77	52	F	3.97534	2015-8-1	2019-7-22	85	1	1	0	0	1	0	1	1	2	0	0	0	deep caries	0	0	7	0	SSC	36	1	2022-12-06	Retained deciduous teeth	II			-	-	-	-	-	-		3	0
78	53	M	5.81096	2013-9-23	2019-7-15	55	0	1	1	0	0	1	1	1	3	0	0	0	deep caries	0	0	7	0	SSC	36	1		-				-	-	-	-	-	-		3	0
79	54	F	4.83836	2014-5-17	2019-3-18	84	1	0	0	1	0	1	1	1	3	0	0	0	deep caries	0	1	1	0	SSC	18	0	2020-06-04	chronic periapical periodontitis	II		redness and swelling	-	-	II°root furcation shadow	III°root furcation shadow	III°root furcation shadow	III°external root resorption;III°root furcation shadow		3	0
80	55	M	4.06301	2015-2-10	2019-3-4	75	1	1	1	0	0	0	1	1	2	0	0	0	deep caries	0	0	1	0	SSC	36	1		-				-	-	-	-	-	-		3	0
81	56	F	4.43014	2015-5-21	2019-10-24	74	1	0	0	0	0	0	1	0	1	0	0	0	deep caries	0	0	7	0	SSC	30	1		-				-	-	-	-	-			2.5	0
82	57	M	5.65205	2014-4-21	2019-12-14	64	0	0	1	1	0	0	1	1	3	0	0	0	deep caries	0	0	5	0	SSC	30	1		-				-	-	-	-	-			2.5	1
83	58	M	4.53973	2015-5-24	2019-12-6	75	1	1	1	0	0	0	1	1	2	0	0	0	deep caries	0	0	5	0	SSC	30	0	2022-08-25	chronic periapical periodontitis	I	-	fistula	-	I°root furcation shadow	I°root furcation shadow	I°root furcation shadow	III°external root resorption;III°root furcation shadow			2.5	0
84	59	F	5.93699	2013-12-10	2019-11-16	55	0	1	0	0	0	1	1	1	2	0	0	0	deep caries	0	0	2	0	SSC	30	1		-				-	-	-	-	-			2.5	0
85	60	M	3.64384	2016-3-26	2019-11-15	84	1	0	0	0	0	0	1	0	1	0	0	0	deep caries	0	0	5	0	SSC	30	1		-				-	-	-	-	-			2.5	0
86	61	M	5.19178	2014-6-8	2019-8-16	75	1	1	1	0	0	1	1	1	3	0	0	0	deep caries	0	0	1	0	SSC	18	0	2020-07-10	chronic periapical periodontitis				-	-	internal root resorption	internal root resorption	internal root resorption；I°root furcation shadow			2.5	0
87	61	M	5.19178	2014-6-8	2019-8-16	55	0	1	1	1	0	0	0	1	2	0	0	0	deep caries	0	0	1	0	SSC	24	0	2021-07-10	chronic periapical periodontitis				-	-	-	II°external root resorption	II°external root resorption			2.5	0
88	62	F	3.89863	2015-9-1	2019-7-25	65	0	1	0	0	0	1	1	1	2	0	0	0	deep caries	0	0	3	0	SSC	30	1		-				-	-	-	-	-			2.5	0
89	62	F	3.89863	2015-9-1	2019-7-25	64	0	0	0	1	0	0	1	1	2	0	0	0	deep caries	0	0	3	0	SSC	30	1		-				-	-	-	-	-			2.5	0
90	62	F	3.89863	2015-9-1	2019-7-25	54	0	0	0	1	0	0	1	1	2	0	0	0	deep caries	0	0	3	0	SSC	30	1		-				-	-	-	-	-			2.5	0
91	63	F	5.74795	2013-9-28	2019-6-27	65	0	1	1	0	0	1	1	1	3	0	0	0	deep caries	0	0	3	0	SSC	30	1		-				pulp canal obliteration	pulp canal obliteration	pulp canal obliteration	pulp canal obliteration	pulp canal obliteration			2.5	0
92	64	F	5.06301	2014-5-24	2019-6-15	65	0	1	0	0	1	0	1	1	2	0	0	0	deep caries	0	0	7	0	SSC	30	1		-				pulp canal obliteration	pulp canal obliteration	pulp canal obliteration	pulp canal obliteration	pulp canal obliteration			2.5	0
93	64	F	5.06301	2014-5-24	2019-6-15	55	0	1	1	0	0	0	1	1	2	0	0	0	deep caries	0	0	7	0	SSC	30	1		-				-	-	-	-	-			2.5	0
94	65	M	5.39726	2014-1-7	2019-5-31	85	1	1	0	0	1	0	1	1	2	0	0	0	deep caries	0	0	3	0	SSC	30	1		-				-	-	-	-	-			2.5	0
95	65	M	5.39726	2014-1-7	2019-5-31	75	1	1	0	0	1	0	1	1	2	0	0	0	deep caries	0	0	3	0	SSC	24	0						-	-	-	II°external root resorption(distal root)，pulp canal obliteration	II°external root resorption(distal root)，pulp canal obliteration			2.5	0
96	65	M	5.39726	2014-1-7	2019-5-31	74	1	0	0	0	1	0	1	1	2	0	0	0	deep caries	0	0	3	0	SSC	24	0						-	-	-	internal root resorption	internal root resorption			2.5	0
97	66	M	5.22192	2014-8-13	2019-11-1	85	1	1	1	0	1	0	1	1	3	0	0	0	deep caries	0	0	7	0	SSC	30	1		-				-	-	-	-	-			2.5	0
98	67	F	4.33699	2015-3-27	2019-7-27	65	0	1	1	0	0	0	1	1	2	0	0	0	chronic reversible pulpitis	0	0	3	0	SSC	30	1		-				-	-	-	-	-			2.5	0
99	68	M	5.58082	2013-10-26	2019-5-24	55	0	1	1	0	0	0	1	1	2	0	0	0	deep caries	0	0	1	0	SSC	30	1		-				-	-	-	-	-			2.5	0
100	69	F	3.90959	2015-6-14	2019-5-11	85	1	1	0	0	1	0	1	1	2	0	0	0	deep caries	0	0	7	0	SSC	30	1		-				-	-	-	-	-			2.5	0
101	69	F	3.90959	2015-6-14	2019-5-11	74	1	0	0	0	0	0	1	0	1	0	0	0	deep caries	0	0	7	0	SSC	30	1		-				-	-	-	-	-			2.5	0
102	69	F	3.90959	2015-6-14	2019-5-11	65	0	1	0	1	1	0	1	1	3	0	0	0	deep caries	0	0	7	0	SSC	30	1		-				-	-	-	-	-			2.5	0
103	69	F	3.90959	2015-6-14	2019-5-11	55	0	1	0	0	1	1	1	1	3	0	0	0	deep caries	0	0	7	0	SSC	30	1		-				-	-	-	-	-			2.5	0
104	69	F	3.90959	2015-6-14	2019-5-11	54	0	0	0	0	0	0	1	0	1	0	0	0	deep caries	0	0	7	0	SSC	30	1		-				-	-	-	-	-			2.5	0
105	70	F	7.05479	2012-4-15	2019-5-3	84	1	0	0	1	0	0	1	1	2	0	0	0	deep caries	0	0	7	0	SSC	30	1		-				-	-	-	-	-			2.5	0
106	70	F	7.05479	2012-4-15	2019-5-3	75	1	1	0	0	0	0	1	0	1	0	0	0	deep caries	0	0	7	0	SSC	30	1		-				-	-	-	-	-			2.5	0
107	70	F	7.05479	2012-4-15	2019-5-3	74	1	0	0	0	0	0	1	0	1	0	0	0	deep caries	0	0	7	0	SSC	30	1		-				-	-	-	-	-			2.5	0
108	70	F	7.05479	2012-4-15	2019-5-3	65	0	1	0	0	0	1	1	1	2	0	0	0	deep caries	0	0	7	0	SSC	30	1		-				-	-	-	-	-			2.5	0
109	70	F	7.05479	2012-4-15	2019-5-3	55	0	1	0	0	0	1	1	1	2	0	0	0	deep caries	0	0	7	0	SSC	30	1		-				-	-	-	-	-			2.5	0
110	71	F	4.44932	2014-10-10	2019-3-22	75	1	1	0	0	0	0	1	0	1	0	0	0	deep caries	0	0	2	0	SSC	30	1		-				-	-	-	-	-			2.5	0
111	72	M	3.19726	2016-8-9	2019-10-19	84	1	0	0	0	0	1	1	1	2	0	0	0	deep caries	0	0	2	0	SSC	42	1						-	-	-	-	-			2.5	0
112	73	M	3.83836	2015-8-7	2019-6-8	85	1	1	1	0	0	1	1	1	3	0	0	0	deep caries	0	0	4	0	SSC	30	1		-				-	-	-	-	-			2.5	0
113	73	M	3.83836	2015-8-7	2019-6-8	84	1	0	0	1	0	0	1	1	2	0	0	0	deep caries	0	0	4	0	SSC	30	1		-				-	-	-	-	-			2.5	0
114	73	M	3.83836	2015-8-7	2019-6-8	54	0	0	1	0	0	0	1	1	2	0	0	0	deep caries	0	0	4	0	SSC	18	0	2020-01-22	chronic periapical periodontitis	I	-	pustules	-	-	-	-	-			2.5	0
115	74	M	5.29315	2014-2-10	2019-5-26	65	0	1	1	0	1	1	1	1	4	0	0	0	deep caries	0	0	7	0	SSC	30	1		-				-	-	-	-	-			2.5	0
116	75	F	4.64658	2015-3-15	2019-11-5	85	1	1	1	0	0	1	1	1	3	0	0	0	deep caries	0	0	4	0	SSC	30	1		-				-	-	-	-	-			2.5	0
117	75	F	4.64658	2015-3-15	2019-11-5	75	1	1	1	0	0	1	1	1	3	0	0	0	deep caries	0	0	4	0	SSC	30	0						-	-	-	-	II°external root resorption			2.5	0
118	76	M	4.63836	2015-1-28	2019-9-17	85	1	1	1	0	0	0	1	1	2	0	0	0	deep caries	0	0	7	0	SSC	30	1		-				-	-	-	-	-			2.5	0
119	76	M	4.63836	2015-1-28	2019-9-17	75	1	1	1	1	0	0	1	1	3	0	0	0	deep caries	0	0	7	0	SSC	30	1		-				-	-	-	-	pulp canal obliteration			2.5	0
120	77	F	2.91507	2016-2-1	2019-1-1	84	1	0	0	1	0	0	1	1	2	0	0	0	deep caries	0	0	1	0	SSC	30	1		-				-	-	-	-	-			2.5	0
121	77	F	2.91507	2016-2-1	2019-1-1	54	0	0	0	0	1	0	1	1	2	0	0	0	deep caries	0	0	1	0	SSC	30	1		-				-	-	-	-	-			2.5	0
122	78	M	6.21096	2013-1-1	2019-3-18	64	0	0	1	1	0	0	1	1	3	0	0	0	deep caries	0	0	1	0	SSC	30	1		-				-	-	-	-	-			2.5	0
123	78	M	6.21096	2013-1-1	2019-3-18	55	0	1	1	1	0	1	0	1	3	0	0	0	deep caries	0	0	1	0	SSC	30	0	2021-08-07	chronic periapical periodontitis	I		fistula	-	-	-	-	-			2.5	0
124	78	M	6.21096	2013-1-1	2019-3-18	54	0	0	1	1	1	0	1	1	4	0	0	0	deep caries	0	0	1	0	SSC	30	1	2021-08-07	Retained deciduous teeth	II			-	-	-	-	-	-	-	2.5	0
125	79	M	4.46575	2015-2-17	2019-8-4	85	1	1	1	0	1	1	1	1	4	0	0	0	deep caries	0	0	2	0	SSC	30	1		-				-	-	-	-	-			2.5	0
126	79	M	4.46575	2015-2-17	2019-8-4	84	1	0	1	1	0	1	1	1	4	0	0	0	deep caries	0	0	2	0	SSC	30	1		-				-	-	-	-	-			2.5	0
127	79	M	4.46575	2015-2-17	2019-8-4	75	1	1	1	1	1	1	1	1	5	0	0	0	deep caries	0	0	2	0	SSC	30	1		-				-	-	-	-	-			2.5	0
128	79	M	4.46575	2015-2-17	2019-8-4	54	0	0	1	1	1	0	1	1	4	0	0	0	deep caries	0	0	2	0	SSC	30	1		-				-	-	-	-	-			2.5	0
129	80	M	6.26027	2014-1-20	2020-4-23	74	1	0	0	1	0	0	1	1	2	0	0	0	deep caries	0	0	1	0	SSC	24	1		-				-	-	-	-				2	0
130	80	M	6.26027	2014-1-20	2020-4-23	55	0	1	0	0	0	0	1	0	1	0	0	0	deep caries	0	0	1	0	SSC	24	1		-				-	-	-	-				2	0
131	81	M	3.07671	2016-5-3	2019-5-31	84	1	0	1	0	0	0	1	1	2	0	0	0	deep caries	0	0	1	0	SSC	24	1		-				-	-	-	I°root furcation shadow；pulp canal obliteration				2	0
132	81	M	3.07671	2016-5-3	2019-5-31	74	1	0	0	0	0	0	1	0	1	0	0	0	deep caries	0	0	1	0	SSC	24	1		-				-	-	-	pulp canal obliteration				2	0
133	82	F	7.01918	2012-11-25	2019-11-30	65	0	1	1	0	0	0	1	1	2	0	0	0	deep caries	0	0	3	0	SSC	24	1		-				-	-	-	-				2	0
134	83	M	4.05205	2015-10-27	2019-11-14	85	1	1	0	0	1	1	1	1	3	0	0	0	deep caries	0	0	3	0	SSC	24	1		-				-	-	-	-				2	0
135	84	F	3.66849	2016-3-16	2019-11-14	64	0	0	1	0	0	1	1	1	3	0	0	0	deep caries	0	0	3	0	SSC	24	1		-				-	-	-	-				2	0
136	85	F	4.47671	2015-5-12	2019-11-1	65	0	1	0	0	1	1	1	1	3	0	0	0	deep caries	0	0	2	0	SSC	24	1		-				-	-	-	-				2	0
137	86	M	6.90411	2012-11-24	2019-10-18	65	0	1	1	0	1	0	1	1	3	0	0	0	deep caries	0	0	1	0	SSC	24	1		-				-	-	-	-				2	0
138	86	M	6.90411	2012-11-24	2019-10-18	64	0	0	1	0	1	0	1	1	3	0	0	0	deep caries	0	0	1	0	SSC	24	1		-				-	-	-	-				2	0
139	87	F	3.56438	2016-2-27	2019-9-20	84	1	0	0	0	0	0	1	0	1	0	0	0	deep caries	0	0	3	0	SSC	24	1		-				-	-	pulp canal obliteration	pulp canal obliteration				2	0
140	87	F	3.56438	2016-2-27	2019-9-20	74	1	0	0	0	0	0	1	0	1	0	0	0	deep caries	0	0	3	0	SSC	24	1		-				-	I°root furcation shadow	I°root furcation shadow	I°root furcation shadow				2	0
141	88	F	3.8411	2015-11-4	2019-9-6	55	0	1	0	0	0	0	1	0	1	0	0	0	deep caries	0	0	3	0	SSC	24	1		-				-	-	-	-				2	0
142	89	M	5.32877	2014-5-9	2019-9-5	74	1	0	1	1	0	0	1	1	3	0	0	0	deep caries	0	0	3	0	SSC	24	1		-				-	-	-	-				2	0
143	90	M	4.15068	2015-1-19	2019-3-14	65	0	1	0	1	0	1	1	1	3	0	0	0	deep caries	0	0	3	0	SSC	24	1		-				-	-	-	-				2	0
144	90	M	4.15068	2015-1-19	2019-3-14	55	0	1	1	0	0	1	1	1	3	0	0	0	deep caries	0	0	3	0	SSC	24	1		-				-	-	-	-				2	0
145	91	F	4.05479	2015-1-13	2019-2-1	84	1	0	1	0	1	0	1	1	3	0	0	0	deep caries	0	0	1	0	SSC	24	1		-				-	-	-	-				2	0
146	92	F	3.92055	2015-11-26	2019-10-27	85	1	1	0	1	1	0	1	1	3	0	0	0	deep caries	0	0	7	0	SSC	24	1		-				-	-	-	-				2	0
147	92	F	3.92055	2015-11-26	2019-10-27	84	1	0	0	1	0	0	1	1	2	0	0	0	deep caries	0	0	7	0	SSC	24	1		-				-	-	-	-				2	0
148	92	F	3.92055	2015-11-26	2019-10-27	74	1	0	0	1	0	0	1	1	2	0	0	0	deep caries	0	0	7	0	SSC	24	1		-				-	-	-	-				2	0
149	92	F	3.92055	2015-11-26	2019-10-27	54	0	0	0	1	0	0	1	1	2	0	0	0	deep caries	0	0	7	0	SSC	24	1		-				-	-	-	-				2	0
150	93	F	4.32603	2015-6-17	2019-10-13	75	1	1	1	0	1	0	1	1	3	0	0	0	deep caries	0	0	7	0	SSC	24	1		-				-	-	-	-				2	0
151	94	M	4.24384	2015-7-15	2019-10-11	54	0	0	1	1	1	1	0	1	4	0	0	0	deep caries	0	0	1	0	SSC	24	1		-				-	-	-	-				2	0
152	95	M	5.49863	2014-3-24	2019-9-21	65	0	1	1	0	1	0	1	1	3	0	0	0	deep caries	0	0	6	0	SSC	24	0	2021-10-10	chronic periapical periodontitis	0	-	pustules	-	-	-	-				2	0
153	96	M	6.40548	2013-4-20	2019-9-13	84	1	0	0	0	0	0	1	0	1	0	0	0	chronic reversible pulpitis	0	0	3	0	SSC	24	1		-				-	-	-	-				2	0
154	97	F	4.0137	2015-8-26	2019-8-30	74	1	0	0	1	0	1	1	1	3	0	0	0	deep caries	0	0	6	0	SSC	24	0	2021-06-29	chronic periapical periodontitis	0	-	-	-	-	-	-				2	0
155	98	M	4.89589	2014-10-8	2019-8-30	84	1	0	1	1	0	0	1	1	3	0	0	0	deep caries	0	0	3	0	SSC	12	0	2020-02-25	chronic periapical periodontitis	0	-	-	I°root furcation shadow	II°root furcation shadow	II°root furcation shadow	II°root furcation shadow				2	0
156	98	M	4.89589	2014-10-8	2019-8-30	74	1	0	1	1	0	0	1	1	3	0	0	0	deep caries	0	0	3	0	SSC	24	1		-				-	-	-	-				2	0
157	99	M	5.54795	2014-2-7	2019-8-24	54	0	0	0	1	0	0	1	1	2	0	0	0	deep caries	0	0	4	0	SSC	24	1		-				-	-	-	-				2	0
158	100	F	2.76986	2016-11-16	2019-8-23	64	0	0	1	0	1	0	1	1	3	0	0	0	deep caries	0	0	4	0	SSC	24	1		-				-	-	-	-				2	0
159	100	F	2.76986	2016-11-16	2019-8-23	54	0	0	1	0	1	0	1	1	3	0	0	0	deep caries	0	0	4	0	SSC	24	1		-				-	-	-	-				2	0
160	101	M	3.87123	2015-10-4	2019-8-17	85	1	1	1	1	0	0	1	1	3	0	0	0	deep caries	0	0	6	0	SSC	24	0	2021-10-29	chronic periapical periodontitis	0	-	-	-	-	-	-	-			2	0
161	101	M	3.87123	2015-10-4	2019-8-17	84	1	0	0	1	0	0	1	1	2	0	0	0	deep caries	0	0	6	0	SSC	24	0	2021-03-12	chronic periapical periodontitis	0	-	pustules	-	-	-	-	-			2	0
162	102	M	5.97808	2013-8-12	2019-8-2	65	0	1	1	1	0	1	1	1	4	0	0	0	deep caries	0	0	3	0	SSC	24	1		-				-	-	-	-				2	0
163	102	M	5.97808	2013-8-12	2019-8-2	55	0	1	1	1	0	1	1	1	4	0	0	0	deep caries	0	0	3	0	SSC	24	1		-				-	-	-	-				2	0
164	103	M	4.25753	2015-4-24	2019-7-26	85	1	1	1	0	0	0	1	1	2	0	0	0	deep caries	0	0	4	0	SSC	30	1	2021-12-10	deep caries after pulpotomy	0	-	-	-	-	-	-				2	0
165	103	M	4.25753	2015-4-24	2019-7-26	54	0	0	0	1	0	1	1	1	3	0	0	0	deep caries	0	0	4	0	SSC	24	1		-				-	-	-	-				2	0
166	104	M	4.54521	2014-12-27	2019-7-13	64	0	0	1	1	0	1	1	1	4	0	0	0	deep caries	0	0	7	0	SSC	24	1		-				-	-	-	-				2	0
167	105	M	4.45753	2014-10-15	2019-3-30	84	1	0	1	1	0	0	1	1	3	0	0	0	deep caries	0	0	7	0	SSC	24	1		-				-	-	-	-				2	0
168	105	M	4.45753	2014-10-15	2019-3-30	74	1	0	1	1	0	0	1	1	3	0	0	0	deep caries	0	0	7	0	SSC	24	1		-				-	-	-	-				2	0
169	105	M	4.45753	2014-10-15	2019-3-30	55	0	1	1	0	1	1	1	1	4	0	0	0	deep caries	0	0	7	0	SSC	24	1		-				-	-	-	-				2	0
170	105	M	4.45753	2014-10-15	2019-3-30	54	0	0	0	1	0	0	1	1	2	0	0	0	deep caries	0	0	7	0	SSC	24	1		-				-	-	-	-				2	0
171	106	F	4.30959	2014-10-27	2019-2-16	84	1	0	1	1	0	0	1	1	3	0	0	0	deep caries	0	0	1	0	SSC	24	1		-				-	-	-	-				2	0
172	107	M	2.82192	2017-3-5	2019-12-29	74	1	0	1	0	0	1	1	1	3	0	0	0	deep caries	0	0	1	0	SSC	24	1		-				-	-	-	-				2	0
173	108	M	4.52603	2015-6-20	2019-12-28	65	0	1	0	0	1	1	1	1	3	0	0	0	deep caries	0	0	1	0	SSC	24	1		-				-	-	-	-				2	0
174	109	M	4.7726	2015-2-9	2019-11-16	75	1	1	0	1	1	1	1	1	4	0	0	0	deep caries	0	0	7	0	SSC	24	1		-				-	-	-	-				2	0
175	109	M	4.7726	2015-2-9	2019-11-16	65	0	1	1	0	1	1	1	1	4	0	0	0	deep caries	0	0	7	0	SSC	24	1		-				-	-	-	-				2	0
176	109	M	4.7726	2015-2-9	2019-11-16	55	0	1	1	0	1	1	1	1	4	0	0	0	deep caries	0	0	7	0	SSC	24	1		-				-	-	-	-				2	0
177	110	M	4.36438	2015-5-12	2019-9-21	64	0	0	0	0	1	1	1	1	3	0	0	0	deep caries	0	0	1	0	SSC	24	1		-				-	-	-	-				2	0
178	110	M	4.36438	2015-5-12	2019-9-21	54	0	0	0	0	1	1	1	1	3	0	0	0	deep caries	0	0	1	0	SSC	24	1		-				-	-	-	-				2	0
179	111	M	4.11233	2015-7-17	2019-8-26	85	1	1	1	0	1	1	1	1	4	0	0	0	deep caries	0	0	2	0	SSC	24	1		-				-	-	-	-				2	0
180	111	M	4.11233	2015-7-16	2019-8-25	74	1	0	0	0	1	0	1	1	2	0	0	0	deep caries	0	0	2	0	SSC	24	1		-				-	-	-	-				2	0
181	112	M	3.10411	2016-5-31	2019-7-7	84	1	0	0	0	1	1	1	1	3	0	0	0	deep caries	0	0	2	0	SSC	24	1		-				-	-	-	-				2	0
182	113	F	6.48219	2012-12-24	2019-6-16	74	1	0	0	1	0	0	1	1	2	0	0	0	deep caries	0	0	1	0	SSC	30	1	2021-07-31	Retained deciduous teeth	I			-	-	-	-	-	-	-	2	0
183	114	F	5.78082	2013-7-11	2019-4-20	65	0	1	1	0	1	0	1	1	3	0	0	0	deep caries	0	0	1	0	SSC	24	1		-				-	-	-	-				2	0
184	115	M	5.27397	2013-12-23	2019-3-31	84	1	0	0	1	0	0	1	1	2	0	0	0	deep caries	0	0	4	0	SSC	24	1		-				-	-	-	-				2	0
185	115	M	5.27397	2013-12-23	2019-3-31	55	0	1	1	0	0	0	1	1	2	0	0	0	deep caries	0	0	4	0	SSC	42	1						-	-	-	-				2	0
186	116	M	3.31781	2015-11-15	2019-3-10	54	0	0	1	1	0	0	1	1	3	0	0	0	deep caries	0	0	1	0	SSC	24	1		-				-	-	-	-				2	0
187	117	F	2.86849	2017-2-3	2019-12-17	84	1	0	1	0	0	1	1	1	3	0	0	0	deep caries	0	0	7	0	SSC	24	1		-				-	-	-	-				2	0
188	117	F	2.86849	2017-2-3	2019-12-17	74	1	0	0	1	0	0	1	1	2	0	0	0	deep caries	0	0	7	0	SSC	24	1		-				-	-	-	Dentin bridge				2	0
189	118	M	4.2	2015-6-2	2019-8-13	65	0	1	1	0	1	1	1	1	4	0	0	0	deep caries	0	0	4	0	SSC	24	1		-				-	-	-	-				2	0
190	118	M	4.2	2015-6-2	2019-8-13	64	0	0	0	0	0	0	1	0	1	0	0	0	deep caries	0	0	4	0	SSC	24	1		-				-	-	-	-				2	0
191	119	M	4.08767	2015-7-5	2019-8-5	65	0	1	1	1	1	1	0	1	4	0	0	0	deep caries	0	0	7	0	SSC	24	1		-				-	-	-	-				2	0
192	120	F	4.06301	2015-11-12	2019-12-4	84	1	0	0	1	0	0	1	1	2	0	0	0	deep caries	0	0	3	0	SSC	18	1		-				-	-	-					1.5	0
193	120	F	4.06301	2015-11-12	2019-12-4	54	0	0	0	1	1	1	1	1	4	0	0	0	deep caries	0	0	3	0	SSC	18	1		-				-	-	-					1.5	0
194	121	M	4.73699	2015-2-4	2019-10-30	85	1	1	0	1	0	0	1	1	2	0	0	0	deep caries	0	0	2	0	SSC	18	1		-				-	-	-					1.5	0
195	121	M	4.73699	2015-2-4	2019-10-30	84	1	0	0	1	0	0	1	1	2	0	0	0	deep caries	0	0	2	0	SSC	18	1		-				-	-	-					1.5	0
196	121	M	4.73699	2015-2-4	2019-10-30	75	1	1	1	0	0	0	1	1	2	0	0	0	deep caries	0	0	2	0	SSC	18	1		-				-	-	-					1.5	0
197	122	M	3.81918	2016-2-18	2019-12-13	64	0	0	1	1	1	1	1	1	5	0	0	0	deep caries	0	0	1	0	SSC	18	0	2021-06-03	chronic periapical periodontitis	0	-	-	-	-	II°root furcation shadow					1.5	0
198	122	M	3.81918	2016-2-18	2019-12-13	55	0	1	0	0	1	1	1	1	3	0	0	0	deep caries	0	0	1	0	SSC	18	0	2021-06-03	chronic periapical periodontitis	0	+	pustules	-	-	II°root furcation shadow					1.5	0
199	123	M	4.73151	2015-3-8	2019-11-29	84	1	0	0	1	0	0	1	1	2	0	0	0	deep caries	0	0	4	0	SSC	18	1		-				-	-	-					1.5	0
200	123	M	4.73151	2015-3-8	2019-11-29	65	0	1	1	0	0	1	1	1	3	0	0	0	deep caries	0	0	4	0	SSC	18	1		-				-	-	-					1.5	0
201	123	M	4.73151	2015-3-8	2019-11-29	55	0	1	1	1	1	1	1	1	5	0	0	0	deep caries	0	0	4	0	SSC	18	1		-				-	-	-					1.5	0
202	123	M	4.73151	2015-3-8	2019-11-29	54	0	0	1	1	1	1	1	1	5	0	0	0	deep caries	0	0	4	0	SSC	18	1		-				-	-	-					1.5	0
203	124	M	5.18356	2014-8-7	2019-10-12	64	0	0	0	1	1	0	1	1	3	0	0	0	deep caries	0	0	7	0	SSC	18	1		-				-	-	-					1.5	0
204	125	M	4.71781	2014-10-11	2019-6-29	65	0	1	1	0	0	0	1	1	2	0	0	0	deep caries	0	0	1	0	SSC	18	1		-				-	-	-					1.5	0
205	125	M	4.71781	2014-10-11	2019-6-29	64	0	0	1	1	0	0	1	1	3	0	0	0	deep caries	0	0	1	0	SSC	18	1		-				-	-	-					1.5	0
206	126	F	4.75616	2014-5-30	2019-3-1	65	0	1	1	0	0	1	1	1	3	0	0	0	deep caries	0	0	7	0	SSC	18	1		-				-	-	-					1.5	0
207	126	F	4.75616	2014-5-30	2019-3-1	54	0	0	0	1	0	0	1	1	2	0	0	0	deep caries	0	0	7	0	SSC	18	1		-				-	-	-					1.5	0
208	127	M	6.61918	2013-3-31	2019-11-10	74	1	0	0	1	1	0	1	1	3	0	0	0	deep caries	0	0	7	0	SSC	18	0	2021-04-15	chronic periapical periodontitis	0	-	-	-	-	-					1.5	0
209	128	F	4.02192	2015-10-26	2019-11-2	85	1	1	1	1	1	0	1	1	4	0	0	0	deep caries	0	0	7	0	SSC	18	1		-				-	-	-					1.5	0
210	128	F	4.02192	2015-10-26	2019-11-2	84	1	0	0	1	0	0	1	1	2	0	0	0	deep caries	0	0	7	0	SSC	18	1		-				-	-	-					1.5	0
211	128	F	4.02192	2015-10-26	2019-11-2	75	1	1	1	0	1	0	1	1	3	0	0	0	deep caries	0	0	7	0	SSC	18	1		-				-	-	-					1.5	0
212	128	F	4.02192	2015-10-26	2019-11-2	74	1	0	0	1	0	0	1	1	2	0	0	0	deep caries	0	0	7	0	SSC	18	1		-				-	-	-					1.5	0
213	128	F	4.02192	2015-10-26	2019-11-2	64	0	0	0	1	0	0	1	1	2	0	0	0	deep caries	0	0	7	0	SSC	18	1		-				-	-	-					1.5	0
214	128	F	4.02192	2015-10-26	2019-11-2	55	0	1	0	0	0	0	1	0	1	0	0	0	deep caries	0	0	7	0	SSC	18	1		-				-	-	-					1.5	0
215	129	M	3.19726	2016-8-9	2019-10-19	74	1	0	0	1	0	0	1	1	2	0	0	0	deep caries	0	0	2	0	SSC	18	1		-				-	-	-					1.5	0
216	129	M	3.19726	2016-8-9	2019-10-19	64	0	0	0	1	0	0	1	1	2	0	0	0	deep caries	0	0	2	0	SSC	18	1		-				-	-	-					1.5	0
217	129	M	3.19726	2016-8-9	2019-10-19	54	0	0	0	0	0	0	1	0	1	0	0	0	deep caries	0	0	2	0	SSC	18	1		-				-	-	-					1.5	0
218	130	M	4.79452	2014-12-7	2019-9-21	74	1	0	0	1	0	0	1	1	2	0	0	0	deep caries	0	0	2	0	SSC	18	1		-				-	-	-					1.5	0
219	131	F	4.2	2015-6-20	2019-8-31	64	0	0	1	1	1	1	1	1	5	0	0	0	deep caries	0	0	7	0	SSC	18	1		-				-	-	-					1.5	0
220	131	F	4.2	2015-6-20	2019-8-31	54	0	0	1	1	1	0	1	1	4	0	0	0	deep caries	0	0	7	0	SSC	18	1		-				-	-	-					1.5	0
221	132	M	6.32877	2013-4-29	2019-8-25	85	1	1	1	1	1	1	1	1	5	0	0	0	deep caries	0	0	7	0	SSC	18	1		-				-	-	-					1.5	0
222	132	M	6.32877	2013-4-29	2019-8-25	75	1	1	1	1	1	0	1	1	4	0	0	0	deep caries	0	0	7	0	SSC	18	1		-				-	-	-					1.5	0
223	132	M	6.32877	2013-4-29	2019-8-25	74	1	0	0	1	0	1	1	1	3	0	0	0	deep caries	0	0	7	0	SSC	18	1		-				-	-	-					1.5	0
224	132	M	6.32877	2013-4-29	2019-8-25	54	0	0	0	1	0	0	1	1	2	0	0	0	deep caries	0	0	7	0	SSC	18	1		-				-	-	-					1.5	0
225	133	F	5.73699	2013-11-30	2019-8-24	84	1	0	0	1	0	0	1	1	2	0	0	0	deep caries	0	0	2	0	SSC	18	1		-				-	-	-					1.5	0
226	133	F	5.73699	2013-11-30	2019-8-24	75	1	1	1	1	1	1	1	1	5	0	0	0	deep caries	0	0	2	0	SSC	18	1		-				-	-	-					1.5	0
227	133	F	5.73699	2013-11-30	2019-8-24	74	1	0	1	1	1	1	1	1	5	0	0	0	deep caries	0	0	2	0	SSC	18	1		-				-	-	-					1.5	0
228	133	F	5.73699	2013-11-30	2019-8-24	64	0	0	1	0	0	1	1	1	3	0	0	0	deep caries	0	0	2	0	SSC	18	1		-				-	-	-					1.5	0
229	133	F	5.73699	2013-11-30	2019-8-24	55	0	1	1	0	0	1	1	1	3	0	0	0	deep caries	0	0	2	0	SSC	18	1		-				-	-	-					1.5	0
230	133	F	5.73699	2013-11-30	2019-8-24	54	0	0	0	1	1	0	1	1	3	0	0	0	deep caries	0	0	2	0	SSC	18	1		-				-	-	-					1.5	0
231	134	M	6.00274	2013-8-18	2019-8-17	75	1	1	1	1	1	1	1	1	5	0	0	0	deep caries	0	0	2	0	SSC	18	1		-				-	-	-					1.5	0
232	135	M	5.28219	2014-5-1	2019-8-10	75	1	1	1	1	1	1	1	1	5	0	0	0	deep caries	0	0	2	0	SSC	18	1		-				-	-	-					1.5	0
233	135	M	5.28219	2014-5-1	2019-8-10	74	1	0	1	1	1	1	1	1	5	0	0	0	deep caries	0	0	2	0	SSC	18	1		-				-	-	-					1.5	0
234	136	M	6.46849	2013-1-30	2019-7-18	75	1	1	1	1	1	1	1	1	5	0	0	0	deep caries	0	0	2	0	SSC	18	1		-				-	-	-					1.5	0
235	136	M	6.46849	2013-1-30	2019-7-18	74	1	0	0	1	1	0	1	1	3	0	0	0	deep caries	0	0	2	0	SSC	18	1		-				-	-	-					1.5	0
236	137	F	4.35068	2015-3-22	2019-7-27	75	1	1	0	0	0	0	1	0	1	0	0	0	deep caries	0	0	7	0	SSC	18	1		-				-	-	-					1.5	0
237	137	F	4.35068	2015-3-22	2019-7-27	64	0	0	1	1	1	0	1	1	4	0	0	0	deep caries	0	0	7	0	SSC	18	1		-				-	-	-					1.5	0
238	137	F	4.35068	2015-3-22	2019-7-27	54	0	0	1	1	1	1	1	1	5	0	0	0	deep caries	0	0	7	0	SSC	18	1		-				-	-	-					1.5	0
239	138	M	3.83562	2015-9-19	2019-7-20	84	1	0	1	0	1	1	1	1	4	0	0	0	deep caries	0	0	1	0	SSC	18	1		-				-	-	-					1.5	0
240	138	M	3.83562	2015-9-19	2019-7-20	75	1	1	0	0	1	0	1	1	2	0	0	0	deep caries	0	0	1	0	充填	18	1		-				-	-	-					1.5	0
241	138	M	3.83562	2015-9-19	2019-7-20	74	1	0	1	1	1	1	1	1	5	0	0	0	deep caries	0	0	1	0	SSC	18	1		-				-	-	-					1.5	0
242	138	M	3.83562	2015-9-19	2019-7-20	64	0	0	1	1	1	0	1	1	4	0	0	0	deep caries	0	0	1	0	SSC	18	1		-				-	-	-					1.5	0
243	138	M	3.83562	2015-9-19	2019-7-20	54	0	0	1	1	1	0	1	1	4	0	0	0	deep caries	0	0	1	0	SSC	18	1		-				-	-	-					1.5	0
244	139	M	8.06849	2011-11-10	2019-12-3	55	0	1	1	0	0	0	1	1	2	0	0	0	deep caries	0	0	4	0	SSC	18	1		-				-	-	-					1.5	0
245	140	M	7.06575	2012-11-3	2019-11-26	85	1	1	1	0	0	0	1	1	2	0	0	0	deep caries	0	0	4	0	SSC	18	1		-				-	-	-					1.5	0
246	140	M	7.06575	2012-11-3	2019-11-26	75	1	1	1	0	0	0	1	1	2	0	0	0	deep caries	0	0	4	0	SSC	18	1		-				-	-	-					1.5	0
247	140	M	7.06575	2012-11-3	2019-11-26	55	0	1	0	0	0	0	1	0	1	0	0	0	deep caries	0	0	4	0	SSC	18	1		-				-	-	-					1.5	0
248	141	F	3.60822	2016-1-4	2019-8-13	85	1	1	0	0	0	0	1	0	1	0	0	0	deep caries	0	0	7	0	SSC	18	1		-				-	-	pulp canal obliteration					1.5	0
249	141	F	3.60822	2016-1-4	2019-8-13	84	1	0	0	0	1	0	1	1	2	0	0	0	deep caries	0	0	7	0	SSC	18	1		-				-	-	-					1.5	0
250	141	F	3.60822	2016-1-4	2019-8-13	75	1	1	1	0	0	0	1	1	2	0	0	0	deep caries	0	0	7	0	SSC	18	1		-				-	-	-					1.5	0
251	141	F	3.60822	2016-1-4	2019-8-13	74	1	0	1	1	1	0	1	1	4	0	0	0	deep caries	0	0	7	0	SSC	18	1		-				-	-	-					1.5	0
252	141	F	3.60822	2016-1-4	2019-8-13	54	0	0	0	1	1	0	1	1	3	0	0	0	deep caries	0	0	7	0	SSC	18	1		-				-	-	-					1.5	0
253	142	M	2.83836	2016-8-15	2019-6-17	84	1	0	1	1	1	1	1	1	5	0	0	0	deep caries	0	0	1	0	SSC	18	1		-				-	-	-					1.5	0
254	142	M	2.83836	2016-8-15	2019-6-17	74	1	0	1	1	1	1	1	1	5	0	0	0	deep caries	0	0	1	0	SSC	18	1		-				-	-	-					1.5	0
255	142	M	2.83836	2016-8-15	2019-6-17	54	0	0	1	1	1	1	1	1	5	0	0	0	deep caries	0	0	1	0	SSC	18	1		-				-	-	-					1.5	0
256	143	M	4.11781	2015-7-9	2019-8-20	65	0	1	0	0	0	1	1	1	2	0	0	0	deep caries	0	0	4	0	SSC	12	1		-				-	-						1	0
257	144	M	4.04384	2015-7-14	2019-7-29	85	1	1	1	0	1	0	1	1	3	0	0	0	deep caries	0	0	1	0	SSC	12	1		-				-	-						1	0
258	144	M	4.04384	2015-7-14	2019-7-29	84	1	0	1	1	0	0	1	1	3	0	0	0	deep caries	0	0	1	0	SSC	12	1		-				-	-						1	0
259	144	M	4.04384	2015-7-14	2019-7-29	74	1	0	1	1	0	0	1	1	3	0	0	0	deep caries	0	0	1	0	SSC	12	1		-				-	-						1	0
260	144	M	4.04384	2015-7-14	2019-7-29	54	0	0	0	1	0	0	1	1	2	0	0	0	deep caries	0	0	1	0	SSC	12	1		-				-	-						1	0
261	145	M	3.98356	2015-7-23	2019-7-16	84	1	0	1	1	1	0	1	1	4	0	0	0	deep caries	0	0	1	0	SSC	12	1		-				-	-						1	0
262	145	M	3.98356	2015-7-23	2019-7-16	74	1	0	1	1	1	0	1	1	4	0	0	0	deep caries	0	0	1	0	SSC	12	1		-				-	-						1	0
263	146	M	4.98904	2014-10-24	2019-10-19	84	1	0	0	1	0	1	1	1	3	0	0	0	deep caries	0	0	4	0	SSC	6	0						internal root resorption							0.5	0
264	147	M	6.61918	2013-3-31	2019-11-10	55	0	1	1	0	0	1	1	1	3	0	0	0	deep caries	0	0	7	0	SSC	6	0	2019-12-26	chronic periapical periodontitis	I	+	redness and swelling								0.5	0
265	148	M	4.18082	2015-9-22	2019-11-26	75	1	1	1	1	1	1	1	1	5	0	0	0	deep caries	0	0	7	0	SSC	6	1		-				-							0.5	0
266	148	M	4.18082	2015-9-22	2019-11-26	74	1	0	1	1	1	0	1	1	4	0	0	0	deep caries	0	0	7	0	SSC	6	1		-				-							0.5	0

## Sheet: iRoot
	basic patient information								decayed tooth surfaces							examination records				image records		treatment information			survival time	status	follow-up
sample number	patient number	gender	age	date of birth	date of treatment	tooth position	maxillary or mandibular tooth	first primary molar or second primary molar	mesial surface	distal surface	buccal surface	lingual surface	occlusal caries	axial caries	number of decayed tooth surfaces	gingival tissues	tooth mobility	perforation of pulp chamber	diagnosis	root resorption	furcation lesions	dentist	material	crown restoration			date of retreatment	diagnosis	tooth mobility	pain on percusion	gingival tissues	6 months	12 months	18 months	24 months	30 months	36 months	42 months	follow-up(year)	Normal replacement of teeth
		F-female; M-male	Directly recording precise age: For example, 2.50 means 2 and a half years old, and 7.75 means 7 years and 9 months old.	year-month-day	year-month-day	FDI World Dental Federation notation	0-maxillary teeth；1-mandibular teeth	0-first primary molar；1-second primary molar	0-no; 1-yes	0-no; 1-yes	0-no; 1-yes	0-no; 1-yes	0-no; 1-yes	Mesial or distal or buccal or lingual surface: 0-no; 1-yes		0-No abnormality	0-(physiological)≤1mm; I-(physiological)>1 mm, but<2 mm; II->2 mm, but<3 mm; III-≥3mm	0-No abnormality		0-No abnormality; 1-Surface resorption; 2-Mid-root resorption; 3-Extensive root resorption	0-No abnormality;1-Density changes	1-dentist 1;2-dentist 2...	0-MTA;1-iRoot BP Plus	SSC-Stainless Steel Crown	(months)	fail-0；success-1	year-month-day	"-"means that no clinical examination abnormalities were found during follow-up	0-(physiological)≤1mm; I-(physiological)>1 mm, but<2 mm; II->2 mm, but<3 mm; III-≥3mm	“-” Negative；“±” weak positive；“＋”positive	"-"means no abnormalities	"-"means no radiographic abnormalities were observed; I°external root resorption-Surface resorption; II°external root resorption-Mid-root resorption; III°external root resorption-Extensive root resorption; I°root furcation shadow-Inter-radicular trabeculation or variation in radiodensity;II°root furcation shadow-Minor inter-radicular radiolucency with trabeculation still present;III°root furcatio…							(year)	0-No tooth replacement occurred during the observation period； 1-Normal replacement of teeth
1	1	F	3.55068	2016-05-12	2019-11-29	54	0	0	0	1	1	0	1	1	3	0	0	0	deep caries	0	0	2	1	SSC	42	1		-				-	-	-	-	-	-	-	3.5	0
2	2	F	5.48219	2014-05-23	2019-11-14	84	1	0	0	1	1	0	1	1	3	0	0	0	deep caries	0	0	2	1	SSC	42	1		-				-	-	-	-	-	-	pulp canal obliteration	3.5	0
3	2	F	5.48219	2014-05-23	2019-11-14	65	0	1	1	0	1	0	1	1	3	0	0	0	deep caries	0	0	2	1	SSC	42	1		-				-	-	-	-	-	-	-	3.5	0
4	2	F	5.48219	2014-05-23	2019-11-14	55	0	1	1	0	0	1	1	1	3	0	0	0	deep caries	0	0	2	1	SSC	42	1		-				-	-	-	-	-	-	-	3.5	0
5	2	F	5.48219	2014-05-23	2019-11-14	54	0	0	1	0	1	0	0	1	2	0	0	0	deep caries	0	0	2	1	SSC	42	1		-				-	-	-	-	-	-	-	3.5	0
6	3	M	5.05205	2014-10-12	2019-10-30	75	1	1	1	1	1	1	1	1	5	0	0	0	deep caries	0	0	2	1	SSC	42	0	2023-04-23	chronic periapical periodontitis	0	±	-	-	-	-	-	-	II°external root resorption	II°external root resorption	3.5	0
7	3	M	5.05205	2014-10-12	2019-10-30	74	1	0	0	1	0	0	1	1	2	0	0	0	deep caries	0	0	2	1	SSC	42	1		-				-	-	-	-	-	-	-	3.5	0
8	4	M	4.73425	2015-01-29	2019-10-23	85	1	1	1	0	0	0	1	1	2	0	0	0	deep caries	0	0	7	1	SSC	42	1		-				-	-	-	-	-	-	-	3.5	0
9	4	M	4.73425	2015-01-29	2019-10-23	75	1	1	1	0	1	0	1	1	3	0	0	0	deep caries	0	0	7	1	SSC	42	1		-				-	-	-	-	-	-	-	3.5	0
10	4	M	4.73425	2015-01-29	2019-10-23	64	0	0	1	0	0	0	1	1	2	0	0	0	deep caries	0	0	7	1	SSC	42	1		-				-	-	-	-	-	-	-	3.5	0
11	5	M	5.41644	2014-05-20	2019-10-18	65	0	1	0	0	0	0	1	0	1	0	0	0	deep caries	0	0	4	1	SSC	42	1		-				-	-	-	-	-	-	-	3.5	0
12	6	F	2.9726	2016-10-27	2019-10-17	85	1	1	1	1	1	1	1	1	5	0	0	0	deep caries	0	0	4	1	SSC	42	1		-				-	-	-	-	-	-	pulp canal obliteration	3.5	0
13	7	F	4.21096	2015-07-25	2019-10-09	84	1	0	0	1	0	0	1	1	2	0	0	0	deep caries	0	0	4	1	SSC	42	1		-				-	-	-	-	-	-	-	3.5	0
14	7	F	4.21096	2015-07-25	2019-10-09	75	1	1	0	1	0	0	1	1	2	0	0	0	deep caries	0	0	4	1	SSC	42	1		-				-	-	-	-	-	-	-	3.5	0
15	7	F	4.21096	2015-07-25	2019-10-09	74	1	0	0	1	0	0	1	1	2	0	0	0	deep caries	0	0	4	1	SSC	42	1		-				-	-	-	-	-	-	-	3.5	0
16	7	F	4.21096	2015-07-25	2019-10-09	64	0	0	0	1	0	0	1	1	2	0	0	0	deep caries	0	0	4	1	SSC	42	1		-				-	-	-	-	-	-	-	3.5	0
17	7	F	4.21096	2015-07-25	2019-10-09	54	0	0	0	1	0	0	1	1	2	0	0	0	deep caries	0	0	4	1	SSC	42	1		-				-	-	-	-	-	-	-	3.5	0
18	8	M	4.19726	2015-07-20	2019-09-29	84	1	0	1	1	0	0	1	1	3	0	0	0	deep caries	0	0	4	1	SSC	42	1		-				-	-	-	-	-	-	-	3.5	0
19	8	M	4.19726	2015-07-20	2019-09-29	75	1	1	1	0	0	0	1	1	2	0	0	0	deep caries	0	0	4	1	SSC	42	1		-				-	-	-	-	-	-	-	3.5	0
20	9	F	3.66027	2016-01-29	2019-09-26	75	1	1	1	1	1	1	1	1	5	0	0	0	deep caries	0	0	7	1	SSC	42	0		-				-	-	-	-	-	-	III°external root resorption;II°root furcation shadow	3.5	0
21	10	M	7.89315	2011-10-23	2019-09-12	54	0	0	1	0	0	0	1	1	2	0	0	0	deep caries	0	0	7	1	SSC	42	1		-				-	-	-	-	-	-	-	3.5	0
22	11	M	5.70137	2013-12-18	2019-08-30	74	1	0	0	1	0	0	1	1	2	0	0	0	deep caries	0	0	2	1	SSC	42	1		-				-	-	-	-	-	-	-	3.5	0
23	12	M	3.15068	2016-06-13	2019-08-07	54	0	0	1	1	1	1	1	1	5	0	0	0	deep caries	0	0	6	1	SSC	42	1		-				-	-	-	-	-	-	-	3.5	0
24	13	M	6.36986	2013-02-28	2019-07-12	65	0	1	1	0	0	1	1	1	3	0	0	0	deep caries	0	0	5	1	SSC	42	1		-				-	-	-	-	-	-	-	3.5	0
25	14	F	5.68219	2014-12-10	2020-08-14	64	0	0	0	1	0	0	1	1	2	0	0	0	deep caries	0	0	5	1	SSC	36	1		-				-	-	-	-	-	-		3	0
26	14	F	5.68219	2014-12-10	2020-08-14	55	0	1	0	0	0	0	1	0	1	0	0	0	deep caries	0	0	5	1	SSC	36	1		-				-	-	-	-	-	-		3	0
27	15	M	5.70137	2014-11-12	2020-07-24	65	0	1	1	0	0	1	1	1	3	0	0	0	deep caries	0	0	2	1	SSC	36	1		-				-	-	-	-	-	-		3	0
28	16	M	3.10685	2017-06-01	2020-07-09	75	1	1	1	0	0	0	1	1	2	0	0	0	deep caries	0	0	2	1	SSC	36	1		-				-	-	-	-	-	-		3	0
29	16	M	3.10685	2017-06-01	2020-07-09	74	1	0	1	1	1	1	1	1	5	0	0	0	deep caries	0	0	2	1	SSC	36	1		-				-	-	-	-	-	-		3	0
30	17	M	5.86027	2014-07-21	2020-05-29	65	0	1	1	0	0	0	1	1	2	0	0	0	deep caries	0	0	3	1	SSC	36	1		-				-	-	-	-	-	-		3	0
31	18	M	4.06575	2016-04-29	2020-05-22	84	1	0	0	1	1	0	1	1	3	0	0	0	deep caries	0	0	5	1	SSC	36	1		-				-	-	-	-	-	-		3	0
32	18	M	4.06575	2016-04-29	2020-05-22	74	1	0	1	1	1	0	0	1	3	0	0	0	deep caries	0	0	5	1	SSC	36	1		-				-	-	-	-	-	-		3	0
33	18	M	4.06575	2016-04-29	2020-05-22	64	0	0	1	1	1	0	0	1	3	0	0	0	deep caries	0	0	5	1	SSC	36	1		-				-	-	-	-	-	-		3	0
34	18	M	4.06575	2016-04-29	2020-05-22	54	0	0	0	1	1	0	1	1	3	0	0	0	deep caries	0	0	5	1	SSC	36	1		-				-	-	-	-	-	-		3	0
35	19	F	6.29315	2014-01-21	2020-05-06	84	1	0	0	1	0	0	1	1	2	0	0	0	deep caries	0	0	7	1	SSC	36	1		-				-	-	-	-	-	-		3	1
36	20	M	5.51507	2014-07-14	2020-01-17	85	1	1	1	0	1	0	0	1	2	0	0	0	deep caries	0	0	5	1	SSC	36	1		-				-	-	-	-	-	-		3	1
37	21	M	5.40274	2014-08-23	2020-01-16	65	0	1	1	0	0	0	1	1	2	0	0	0	deep caries	0	0	7	1	SSC	36	1		-				-	-	-	-	-	-		3	0
38	21	M	5.40274	2014-08-23	2020-01-16	64	0	0	1	1	0	0	1	1	3	0	0	0	deep caries	0	0	7	1	SSC	36	1		-				-	-	-	-	-	-		3	0
39	22	F	4.9726	2015-01-21	2020-01-10	85	1	1	0	0	0	0	1	0	1	0	0	0	deep caries	0	0	2	1	SSC	36	1		-				-	-	-	-	-	-		3	0
40	23	M	4.02192	2015-12-12	2019-12-19	64	0	0	1	1	1	0	1	1	4	0	0	0	deep caries	0	0	3	1	SSC	36	1		-				-	-	-	-	-	pulp canal obliteration		3	0
41	23	M	4.02192	2015-12-12	2019-12-19	54	0	0	1	1	1	0	1	1	4	0	0	0	deep caries	0	0	3	1	SSC	36	1		-				-	-	-	-	-	-		3	0
42	24	M	2.92055	2017-01-16	2019-12-18	84	1	0	1	1	0	1	1	1	4	0	0	0	deep caries	0	0	4	1	SSC	36	1		-				-	-	pulp canal obliteration	pulp canal obliteration	pulp canal obliteration	pulp canal obliteration		3	0
43	25	M	5.75342	2014-03-14	2019-12-13	85	1	1	1	0	0	0	1	1	2	0	0	0	deep caries	0	0	7	1	SSC	36	1		-				-	-	-	-	-	-		3	1
44	25	M	5.75342	2014-03-14	2019-12-13	64	0	0	0	1	0	0	1	1	2	0	0	0	deep caries	0	0	7	1	SSC	36	1		-				-	-	-	-	-	-		3	1
45	26	M	5.10685	2014-10-20	2019-11-27	85	1	1	1	0	1	0	1	1	3	0	0	0	deep caries	0	0	2	1	SSC	36	1		-				-	-	-	-	-	pulp canal obliteration		3	0
46	26	M	5.10685	2014-10-20	2019-11-27	84	1	0	0	1	0	0	1	1	2	0	0	0	deep caries	0	0	2	1	SSC	36	1		-				-	-	-	-	-	pulp canal obliteration		3	0
47	26	M	5.10685	2014-10-20	2019-11-27	65	0	1	1	1	1	1	1	1	5	0	0	0	deep caries	0	0	2	1	SSC	36	1		-				-	-	-	-	-	pulp canal obliteration		3	0
48	26	M	5.10685	2014-10-20	2019-11-27	55	0	1	1	0	0	1	1	1	3	0	0	0	deep caries	0	0	2	1	SSC	36	1		-				-	-	-	-	-	-		3	0
49	27	M	4.27123	2015-08-02	2019-11-08	85	1	1	0	0	1	0	1	1	2	0	0	0	deep caries	0	0	2	1	SSC	36	1		-				-	-	-	-	-	-		3	0
50	27	M	4.27123	2015-08-02	2019-11-08	54	0	0	0	1	0	0	1	1	2	0	0	0	deep caries	0	0	2	1	SSC	36	1		-				-	-	-	-	-	-		3	0
51	28	F	5.84658	2014-01-03	2019-11-07	85	1	1	1	0	1	1	1	1	4	0	0	0	deep caries	0	0	7	1	SSC	36	1		-				-	-	-	-	-	pulp canal obliteration		3	0
52	28	F	5.84658	2014-01-03	2019-11-07	55	0	1	1	0	0	1	1	1	3	0	0	0	deep caries	0	0	7	1	SSC	36	1		-				-	-	-	-	-	-		3	0
53	28	F	5.84658	2014-01-03	2019-11-07	54	0	0	0	1	1	0	1	1	3	0	0	0	deep caries	0	0	7	1	SSC	36	1		-				-	-	-	-	-	-		3	0
54	29	M	3.74247	2016-02-04	2019-11-01	74	1	0	0	1	0	0	1	1	2	0	0	0	deep caries	0	0	2	1	SSC	36	1		-				-	-	-	-	-	-		3	0
55	30	M	5.67945	2014-01-25	2019-09-29	64	0	0	1	1	0	0	1	1	3	0	0	0	deep caries	0	0	2	1	SSC	36	1		-				-	-	-	-	-	-		3	0
56	30	M	5.67945	2014-01-25	2019-09-29	54	0	0	0	1	0	0	1	1	2	0	0	0	deep caries	0	0	2	1	SSC	36	1		-				-	-	-	-	-	-		3	0
57	31	M	6.25479	2013-06-26	2019-09-26	75	1	1	1	0	0	0	1	1	2	0	0	0	deep caries	0	0	6	1	SSC	36	1		-				-	-	-	-	-	-		3	1
58	32	F	5.02466	2014-09-17	2019-09-25	75	1	1	1	0	1	1	1	1	4	0	0	0	deep caries	0	0	4	1	SSC	36	1		-				-	-	-	-	-	-		3	0
59	32	F	5.02466	2014-09-17	2019-09-25	65	0	1	1	0	0	1	1	1	3	0	0	0	deep caries	0	0	4	1	SSC	36	1		-				-	-	-	-	-	-		3	0
60	33	F	5.50411	2014-03-21	2019-09-20	74	1	0	0	1	0	0	1	1	2	0	0	0	deep caries	0	0	5	1	SSC	36	1		-				-	-	-	-	-	-		3	0
61	34	F	5.50411	2014-03-15	2019-09-14	84	1	0	0	1	0	0	1	1	2	0	0	0	deep caries	0	0	5	1	SSC	36	1		-				-	-	-	-	-	-		3	0
62	34	F	5.50411	2014-03-14	2019-09-13	64	0	0	0	1	0	0	1	1	2	0	0	0	deep caries	0	0	5	1	SSC	36	1		-				-	-	-	-	-	-		3	0
63	34	F	5.50411	2014-03-13	2019-09-12	55	0	1	1	0	0	0	1	1	2	0	0	0	deep caries	0	0	5	1	SSC	18	0	2021-05-24	chronic periapical periodontitis	0	+	fistula	-	-	-	-	-	III°external root resorption;III°root furcation shadow		3	0
64	34	F	5.50411	2014-03-12	2019-09-11	54	0	0	0	1	0	0	1	1	2	0	0	0	deep caries	0	0	5	1	SSC	36	1		-				-	-	-	-	-	-		3	0
65	35	M	4.84932	2014-11-01	2019-09-06	84	1	0	0	1	0	0	1	1	2	0	0	0	deep caries	0	0	2	1	SSC	36	1		-				-	-	-	-	-	-		3	0
66	35	M	4.84932	2014-11-01	2019-09-06	74	1	0	0	1	0	0	1	1	2	0	0	0	deep caries	0	0	2	1	SSC	36	1		-				-	-	-	-	-	-		3	0
67	36	M	5.58904	2014-01-26	2019-08-28	84	1	0	1	1	0	0	1	1	3	0	0	0	deep caries	0	0	4	1	SSC	36	1		-				-	-	-	-	-	-		3	0
68	36	M	5.58904	2014-01-26	2019-08-28	74	1	0	1	1	0	0	1	1	3	0	0	0	deep caries	0	0	4	1	SSC	36	1		-				-	-	-	-	-	-		3	0
69	37	M	5.50959	2014-01-20	2019-07-24	65	0	1	1	0	0	0	1	1	2	0	0	0	deep caries	0	0	2	1	SSC	36	1		-				-	-	-	pulp canal obliteration	pulp canal obliteration	pulp canal obliteration		3	0
70	38	M	3.90685	2015-08-16	2019-07-12	54	0	0	0	1	0	0	1	1	2	0	0	0	deep caries	0	0	2	1	SSC	36	1		-				-	-	-	-	-	-		3	0
71	39	F	4.43014	2015-04-01	2019-09-04	85	1	1	1	1	0	0	1	1	3	0	0	0	deep caries	0	0	4	1	SSC	36	0	2022-10-30	chronic periapical periodontitis	I	-	Pustules	-	-	-	-	-	III°external root resorption;III°root furcation shadow		3	0
72	39	F	4.43014	2015-04-01	2019-09-04	84	1	0	1	1	0	0	1	1	3	0	0	0	deep caries	0	0	4	1	SSC	36	1		-				-	-	-	-	-	-		3	0
73	40	F	3.73973	2017-02-22	2020-11-18	74	1	0	0	1	0	0	1	1	2	0	0	0	deep caries	0	0	3	1	SSC	30	1		-				-	-	-	-	-			2.5	0
74	41	M	6.95616	2013-11-29	2020-11-11	84	1	0	0	1	0	0	1	1	2	0	0	0	deep caries	0	0	3	1	SSC	30	1		-				-	-	-	-	pulp canal obliteration			2.5	0
75	42	M	3.68767	2017-03-01	2020-11-06	75	1	1	0	0	1	1	1	1	3	0	0	0	deep caries	0	0	4	1	SSC	30	1		-				-	-	-	-	-			2.5	0
76	42	M	3.68767	2017-03-01	2020-11-06	74	1	0	1	1	0	0	1	1	3	0	0	0	deep caries	0	0	4	1	SSC	30	1		-				-	-	-	-	-			2.5	0
77	43	F	5.43836	2015-05-24	2020-10-29	55	0	1	1	0	0	0	1	1	2	0	0	0	deep caries	0	0	7	1	SSC	30	1		-				-	-	-	-	-			2.5	1
78	43	F	5.43836	2015-05-24	2020-10-29	54	0	0	1	1	0	0	1	1	3	0	0	0	deep caries	0	0	7	1	SSC	30	1		-				-	-	-	-	-			2.5	1
79	44	F	4.01644	2016-10-10	2020-10-15	75	1	1	0	0	0	0	1	0	1	0	0	0	deep caries	0	0	6	1	SSC	30	1		-				-	-	-	-	-			2.5	0
80	44	F	4.01644	2016-10-10	2020-10-15	74	1	0	1	0	1	1	1	1	4	0	0	0	deep caries	0	0	6	1	SSC	30	1		-				-	-	-	-	-			2.5	0
81	45	F	4.51507	2016-04-04	2020-10-08	84	1	0	1	0	0	1	1	1	3	0	0	0	deep caries	0	0	5	1	SSC	30	1		-				-	-	-	-	-			2.5	0
82	45	F	4.51507	2016-04-04	2020-10-08	75	1	1	0	1	1	0	1	1	3	0	0	0	deep caries	0	0	5	1	SSC	30	1		-				-	-	-	-	-			2.5	0
83	45	F	4.51507	2016-04-04	2020-10-08	74	1	0	0	1	1	0	1	1	3	0	0	0	deep caries	0	0	5	1	SSC	30	1		-				-	-	-	-	-			2.5	0
84	46	M	4.61644	2016-02-12	2020-09-23	85	1	1	1	0	0	0	1	1	2	0	0	0	deep caries	0	0	7	1	SSC	18	0		-				-	-	III°external root resorption	III°external root resorption	III°external root resorption			2.5	0
85	46	M	4.61644	2016-02-12	2020-09-23	75	1	1	0	1	0	0	1	1	2	0	0	0	deep caries	0	0	7	1	SSC	30	1		-				-	-	-	-	-			2.5	0
86	46	M	4.61644	2016-02-12	2020-09-23	54	0	0	1	1	1	0	1	1	4	0	0	0	deep caries	0	0	7	1	SSC	30	1		-				-	-	-	-	-			2.5	0
87	47	M	4.70137	2015-12-09	2020-08-20	55	0	1	1	1	0	0	1	1	3	0	0	0	deep caries	0	0	5	1	SSC	30	1		-				-	-	-	-	-			2.5	0
88	47	M	4.70137	2015-12-09	2020-08-20	54	0	0	1	1	0	0	1	1	3	0	0	0	deep caries	0	0	5	1	SSC	30	1		-				-	-	-	-	-			2.5	0
89	48	M	7.16164	2013-06-09	2020-08-05	64	0	0	0	1	0	0	1	1	2	0	0	0	deep caries	0	0	7	1	SSC	30	1		-				-	-	-	-	-			2.5	1
90	49	F	4.31507	2016-04-13	2020-08-05	64	0	0	1	1	1	0	1	1	4	0	0	0	deep caries	0	0	7	1	SSC	30	1		-				-	-	-	-	-			2.5	0
91	50	M	5.41096	2015-03-04	2020-07-30	84	1	0	0	1	0	0	1	1	2	0	0	0	deep caries	0	0	3	1	SSC	30	1		-				-	-	-	-	-			2.5	0
92	50	M	5.41096	2015-03-04	2020-07-30	55	0	1	0	0	0	0	1	0	1	0	0	0	deep caries	0	0	3	1	SSC	30	1		-				-	-	-	-	-			2.5	0
93	51	F	3.20548	2017-05-02	2020-07-15	74	1	0	0	1	0	0	1	1	2	0	0	0	deep caries	0	0	4	1	SSC	30	1		-				-	-	-	-	-			2.5	0
94	52	M	4.31507	2016-03-09	2020-07-01	85	1	1	1	0	0	0	1	1	2	0	0	0	deep caries	0	0	3	1	SSC	30	1		-				-	-	-	-	-			2.5	0
95	52	M	4.31507	2016-03-09	2020-07-01	55	0	1	0	1	0	1	1	1	3	0	0	0	deep caries	0	0	3	1	SSC	30	1		-				-	-	-	-	-			2.5	0
96	53	M	4.36986	2016-01-15	2020-05-28	54	0	0	1	1	0	0	1	1	3	0	0	0	deep caries	0	0	3	1	SSC	30	1		-				-	-	-	-	-			2.5	0
97	54	F	3.73699	2016-08-13	2020-05-08	65	0	1	0	0	1	1	1	1	3	0	0	0	deep caries	0	0	3	1	SSC	30	1		-				-	-	-	-	-			2.5	0
98	55	F	4.00274	2016-05-07	2020-05-07	74	1	0	0	1	0	0	1	1	2	0	0	0	deep caries	0	0	7	1	SSC	30	1		-				-	-	-	-	-			2.5	0
99	55	F	4.00274	2016-05-07	2020-05-07	55	0	1	0	0	0	0	1	0	1	0	0	0	deep caries	0	0	7	1	SSC	30	1		-				-	-	-	-	-			2.5	0
100	55	F	4.00274	2016-05-07	2020-05-07	54	0	0	0	0	0	0	1	0	1	0	0	0	deep caries	0	0	7	1	SSC	30	1		-				-	-	-	-	-			2.5	0
101	56	F	5.02466	2015-01-09	2020-01-17	65	0	1	0	1	0	1	1	1	3	0	0	0	deep caries	0	0	7	1	SSC	30	1		-				-	-	-	-	-			2.5	1
102	56	F	5.02466	2015-01-09	2020-01-17	64	0	0	0	1	0	0	1	1	2	0	0	0	deep caries	0	0	7	1	SSC	30	1		-				-	-	-	-	-			2.5	1
103	56	F	5.02466	2015-01-09	2020-01-17	55	0	1	1	0	0	0	1	1	2	0	0	0	deep caries	0	0	7	1	SSC	30	1		-				-	-	-	-	-			2.5	1
104	56	F	5.02466	2015-01-09	2020-01-17	54	0	0	0	1	0	0	1	1	2	0	0	0	deep caries	0	0	7	1	SSC	30	1		-				-	-	-	-	-			2.5	1
105	57	F	3.18082	2016-11-04	2020-01-09	85	1	1	1	0	1	0	1	1	3	0	0	0	deep caries	0	0	7	1	SSC	30	1		-				-	-	-	-	-			2.5	0
106	57	F	3.18082	2016-11-04	2020-01-09	84	1	0	1	1	1	1	1	1	5	0	0	0	deep caries	0	0	7	1	SSC	30	1		-				-	-	-	-	-			2.5	0
107	57	F	3.18082	2016-11-04	2020-01-09	75	1	1	1	0	1	0	1	1	3	0	0	0	deep caries	0	0	7	1	SSC	30	1		-				-	-	-	-	-			2.5	0
108	57	F	3.18082	2016-11-04	2020-01-09	74	1	0	1	1	1	1	1	1	5	0	0	0	deep caries	0	0	7	1	SSC	30	1		-				-	-	-	-	-			2.5	0
109	57	F	3.18082	2016-11-04	2020-01-09	64	0	0	1	1	1	1	1	1	5	0	0	0	deep caries	0	0	7	1	SSC	30	1		-				-	-	-	-	-			2.5	0
110	57	F	3.18082	2016-11-04	2020-01-09	54	0	0	1	1	1	1	1	1	5	0	0	0	deep caries	0	0	7	1	SSC	30	1		-				-	-	-	-	-			2.5	0
111	58	F	5.77534	2014-03-27	2020-01-03	84	1	0	0	1	0	0	1	1	2	0	0	0	deep caries	0	0	7	1	SSC	30	1		-				-	-	-	-	-			2.5	0
112	58	F	5.77534	2014-03-27	2020-01-03	75	1	1	1	1	1	1	1	1	5	0	0	0	deep caries	0	0	7	1	SSC	30	1		-				-	-	-	-	-			2.5	0
113	58	F	5.77534	2014-03-27	2020-01-03	74	1	0	0	1	0	0	1	1	2	0	0	0	deep caries	0	0	7	1	SSC	30	1		-				-	-	-	-	-			2.5	0
114	59	F	4.08219	2015-11-26	2019-12-25	84	1	0	1	1	1	1	1	1	5	0	0	0	deep caries	0	0	3	1	SSC	30	1		-				-	-	-	-	-			2.5	1
115	60	M	4.96164	2015-01-03	2019-12-19	65	0	1	1	0	0	0	1	1	2	0	0	0	deep caries	0	0	2	1	SSC	30	1		-				-	-	pulp canal obliteration	pulp canal obliteration	pulp canal obliteration			2.5	0
116	60	M	4.96164	2015-01-03	2019-12-19	55	0	1	1	1	1	0	1	1	4	0	0	0	deep caries	0	0	2	1	SSC	30	1		-				-	-	-	-	-			2.5	0
117	61	M	4.7589	2015-03-18	2019-12-19	65	0	1	1	1	0	1	1	1	4	0	0	0	deep caries	0	0	6	1	SSC	30	1		-				-	-	-	-	-			2.5	0
118	61	M	4.7589	2015-03-18	2019-12-19	55	0	1	1	1	0	1	1	1	4	0	0	0	deep caries	0	0	6	1	SSC	30	1		-				-	-	-	-	-			2.5	0
119	62	M	3.74521	2016-03-21	2019-12-18	85	1	1	1	0	1	0	1	1	3	0	0	0	deep caries	0	0	2	1	SSC	30	1		-				-	-	-	-	-			2.5	0
120	63	F	5.12877	2014-10-20	2019-12-05	55	0	1	1	0	0	0	1	1	2	0	0	0	deep caries	0	0	3	1	SSC	30	1		-				-	-	-	-	-			2.5	1
121	64	F	4.62466	2015-04-15	2019-11-28	84	1	0	0	1	0	0	1	1	2	0	0	0	deep caries	0	0	3	1	SSC	30	1		-				-	-	-	-	-			2.5	0
122	65	M	6.29589	2013-07-23	2019-11-07	64	0	0	1	1	0	0	1	1	3	0	0	0	deep caries	0	0	5	1	SSC	30	1		-				-	-	-	-	-			2.5	1
123	65	M	6.29589	2013-07-23	2019-11-07	55	0	1	1	0	0	0	1	1	2	0	0	0	deep caries	3	0	5	1	SSC	12	0		-				-	III°external root resorption	III°external root resorption	III°external root resorption	III°external root resorption			2.5	0
124	65	M	6.29589	2013-07-23	2019-11-07	54	0	0	0	1	0	0	1	1	2	0	0	0	deep caries	0	0	5	1	SSC	30	1		-				-	-	-	-	-			2.5	1
125	66	F	3.8	2016-01-19	2019-11-06	74	1	0	0	0	0	0	1	0	1	0	0	0	deep caries	0	0	3	1	SSC	30	1		-				-	-	-	-	-			2.5	0
126	67	F	4.92603	2014-11-13	2019-10-16	74	1	0	0	1	0	0	1	1	2	0	0	0	deep caries	0	0	7	1	SSC	12	0	2022-05-23	chronic periapical periodontitis	0	-	-	-	III°root furcation shadow	III°root furcation shadow	III°root furcation shadow	II°external root resorption；III°root furcation shadow			2.5	0
127	67	F	4.92603	2014-11-13	2019-10-16	64	0	0	1	1	1	0	1	1	4	0	0	0	deep caries	0	0	7	1	SSC	30	1		-				-	-	-	-	pulp canal obliteration			2.5	0
128	67	F	4.92603	2014-11-13	2019-10-16	55	0	1	1	0	0	0	1	1	2	0	0	0	deep caries	0	0	7	1	SSC	30	1		-				-	-	-	-	-			2.5	0
129	68	M	6.2411	2013-07-01	2019-09-26	64	0	0	1	1	0	0	1	1	3	0	0	0	deep caries	0	0	2	1	SSC	30	1	2023-01-30	Retained deciduous teeth	I	-		-	-	-	-	-		Retained deciduous teeth	2.5	0
130	69	M	4.85205	2014-11-20	2019-09-26	85	1	1	0	1	0	0	1	1	2	0	0	0	deep caries	0	0	2	1	SSC	30	1		-				-	-	-	-	-			2.5	0
131	69	M	4.85205	2014-11-20	2019-09-26	84	1	0	1	0	0	0	1	1	2	0	0	0	deep caries	0	0	2	1	SSC	30	1		-				-	-	-	-	-			2.5	0
132	69	M	4.85205	2014-11-20	2019-09-26	74	1	0	0	1	0	0	1	1	2	0	0	0	deep caries	0	0	2	1	SSC	30	1		-				-	-	-	-	-			2.5	0
133	70	M	4.01918	2015-08-30	2019-09-05	85	1	1	1	1	0	0	1	1	3	0	0	0	deep caries	0	0	2	1	SSC	30	1		-				-	-	-	pulp canal obliteration	pulp canal obliteration			2.5	0
134	71	F	3.45479	2016-03-08	2019-08-21	55	0	1	0	1	0	0	1	1	2	0	0	0	deep caries	0	0	4	1	SSC	30	1		-				-	-	-	-	-			2.5	0
135	72	M	4.89041	2014-09-12	2019-08-02	85	1	1	1	0	0	0	1	1	2	0	0	0	deep caries	0	0	5	1	SSC	30	1		-				-	-	-	-	-			2.5	0
136	72	M	4.89041	2014-09-12	2019-08-02	75	1	1	0	0	0	0	1	0	1	0	0	0	deep caries	0	0	5	1	SSC	30	1		-				-	-	-	-	pulp canal obliteration			2.5	0
137	73	F	3.81644	2016-11-04	2020-08-28	64	0	0	0	0	1	0	1	1	2	0	0	0	deep caries	0	0	3	1	SSC	30	1		-				-	-	-	-				2.5	0
138	73	F	3.81644	2016-11-04	2020-08-28	54	0	0	0	0	0	0	1	0	1	0	0	0	deep caries	0	0	3	1	SSC	30	0	2023-02-14	chronic pulpitis	0	±	-	-	-	-	-	II°external root resorption			2.5	0
139	74	M	2.88493	2016-11-28	2019-10-17	64	0	0	0	0	1	0	1	1	2	0	0	0	deep caries	0	0	2	1	SSC	30	1		-				-	-	-	-	-			2.5	0
140	74	M	2.88493	2016-11-28	2019-10-17	54	0	0	0	0	0	0	1	0	1	0	0	0	deep caries	0	0	2	1	SSC	30	1		-				-	-	-	-	-			2.5	0
141	75	M	4.01918	2015-08-30	2019-09-05	64	0	0	0	0	1	0	1	1	2	0	0	0	deep caries	0	0	2	1	SSC	30	1		-				-	-	-	-	-			2.5	0
142	76	M	3.88493	2017-03-06	2021-01-22	85	1	1	1	1	1	0	1	1	4	0	0	0	deep caries	0	0	7	1	SSC	24	1		-				-	-	-	-				2	0
143	76	M	3.88493	2017-03-06	2021-01-22	75	1	1	1	1	1	0	1	1	4	0	0	0	deep caries	0	0	7	1	SSC	24	1		-				-	-	-	-				2	0
144	76	M	3.88493	2017-03-06	2021-01-22	65	0	1	0	0	0	1	1	1	2	0	0	0	deep caries	0	0	7	1	SSC	24	1		-				-	-	-	-				2	0
145	76	M	3.88493	2017-03-06	2021-01-22	55	0	1	0	0	0	1	1	1	2	0	0	0	deep caries	0	0	7	1	SSC	24	1		-				-	-	-	-				2	0
146	77	F	5.84932	2015-02-26	2020-12-31	64	0	0	1	1	0	0	1	1	3	0	0	0	deep caries	0	0	3	1	SSC	24	1		-				-	-	-	-				2	1
147	78	F	3.87397	2017-02-01	2020-12-16	74	1	0	0	0	1	0	1	1	2	0	0	0	deep caries	0	0	2	1	SSC	24	1		-				-	-	-	-				2	0
148	79	M	5.5726	2015-05-23	2020-12-16	84	1	0	0	0	0	0	1	0	1	0	0	0	deep caries	0	0	3	1	SSC	18	0		-				-	-	ixternal root resorption	ixternal root resorption				2	0
149	80	F	6.02466	2014-12-09	2020-12-16	74	1	0	1	1	0	0	1	1	3	0	0	0	deep caries	0	0	3	1	SSC	24	0		-				-	-	-	II°external root resorption				2	0
150	81	M	3.80548	2017-02-21	2020-12-11	84	1	0	0	1	0	0	1	1	2	0	0	0	deep caries	0	0	7	1	SSC	24	0		-				-	-	-	III°external root resorption				2	0
151	81	M	3.80548	2017-02-21	2020-12-11	55	0	1	1	0	0	1	1	1	3	0	0	0	deep caries	0	0	7	1	SSC	24	1		-				-	-	-	pulp canal obliteration				2	0
152	82	F	3.9863	2016-12-08	2020-12-02	65	0	1	1	0	0	1	1	1	3	0	0	0	deep caries	0	0	3	1	SSC	24	1		-				-	-	-	-				2	0
153	83	F	5.15616	2015-10-02	2020-11-26	84	1	0	1	1	0	0	1	1	3	0	0	0	deep caries	0	0	6	1	SSC	24	1		-				-	-	-	-				2	0
154	83	F	5.15616	2015-10-02	2020-11-26	65	0	1	1	0	0	1	1	1	3	0	0	0	deep caries	0	0	6	1	SSC	24	1		-				-	-	-	-				2	0
155	84	F	3.54521	2017-05-05	2020-11-19	84	1	0	0	0	0	0	1	0	1	0	0	0	deep caries	0	0	5	1	SSC	24	1		-				-	-	-	pulp canal obliteration				2	0
156	85	F	5.90685	2014-12-19	2020-11-13	65	0	1	0	0	0	0	1	0	1	0	0	0	deep caries	0	0	7	1	SSC	24	1		-				-	-	-	-				2	0
157	86	F	5.39178	2015-06-24	2020-11-12	65	0	1	1	0	0	0	1	1	2	0	0	0	deep caries	0	0	7	1	SSC	24	1		-				-	-	pulp canal obliteration	pulp canal obliteration				2	1
158	87	M	3.79452	2017-01-20	2020-11-05	54	0	0	0	0	0	0	1	0	1	0	0	0	deep caries	0	0	3	1	SSC	24	1		-				-	-	-	-				2	0
159	88	M	6.28493	2014-07-11	2020-10-21	64	0	0	0	1	0	1	1	1	3	0	0	0	deep caries	0	0	3	1	SSC	24	1		-				-	-	-	-				2	0
160	88	M	6.28493	2014-07-11	2020-10-21	54	0	0	0	1	0	1	1	1	3	0	0	0	deep caries	0	0	3	1	SSC	24	1		-				-	-	-	-				2	0
161	89	M	5.69863	2015-01-28	2020-10-08	64	0	0	1	1	0	0	1	1	3	0	0	0	deep caries	0	0	3	1	SSC	24	1		-				-	-	-	-				2	0
162	89	M	5.69863	2015-01-28	2020-10-08	54	0	0	1	1	0	0	1	1	3	0	0	0	deep caries	0	0	3	1	SSC	24	1		-				-	-	-	-				2	0
163	90	M	5.01644	2015-09-21	2020-09-25	85	1	1	1	0	0	0	1	1	2	0	0	0	deep caries	0	0	2	1	SSC	24	1		-				-	-	-	pulp canal obliteration				2	0
164	90	M	5.01644	2015-09-21	2020-09-25	75	1	1	1	0	0	0	1	1	2	0	0	0	deep caries	0	0	2	1	SSC	24	1		-				-	-	-	-				2	0
165	91	M	3.45753	2017-04-11	2020-09-24	65	0	1	0	0	0	0	1	0	1	0	0	0	deep caries	0	0	5	1	SSC	24	1		-				-	-	-	-				2	0
166	91	M	3.45753	2017-04-11	2020-09-24	64	0	0	0	1	0	0	1	1	2	0	0	0	deep caries	0	0	5	1	SSC	24	1		-				-	-	-	-				2	0
167	91	M	3.45753	2017-04-11	2020-09-24	54	0	0	0	1	0	0	1	1	2	0	0	0	deep caries	0	0	5	1	SSC	24	1		-				-	-	-	-				2	0
168	92	F	3.22466	2017-06-15	2020-09-04	84	1	0	0	0	0	0	1	0	1	0	0	0	deep caries	0	0	3	1	SSC	24	1		-				-	-	-	-				2	0
169	93	F	3.51233	2017-02-08	2020-08-13	84	1	0	0	1	0	0	1	1	2	0	0	0	deep caries	0	0	6	1	SSC	24	1		-				-	-	-	pulp canal obliteration				2	0
170	93	F	3.51233	2017-02-08	2020-08-13	74	1	0	0	1	0	0	1	1	2	0	0	0	deep caries	0	0	6	1	SSC	24	1		-				-	-	-	-				2	0
171	94	M	3.95068	2016-08-31	2020-08-12	85	1	1	1	0	0	0	1	1	2	0	0	0	deep caries	0	0	4	1	SSC	24	1		-				-	-	-	-				2	0
172	94	M	3.95068	2016-08-31	2020-08-12	75	1	1	1	0	0	0	1	1	2	0	0	0	deep caries	0	0	4	1	SSC	24	1		-				-	-	-	-				2	0
173	94	M	3.95068	2016-08-31	2020-08-12	55	0	1	1	1	1	1	1	1	5	0	0	0	deep caries	0	0	4	1	SSC	24	1		-				-	-	-	-				2	0
174	95	M	4.41644	2016-03-02	2020-07-31	65	0	1	0	0	0	1	1	1	2	0	0	0	deep caries	0	0	2	1	SSC	24	1		-				-	-	-	-				2	0
175	95	M	4.41644	2016-03-02	2020-07-31	55	0	1	1	1	1	1	1	1	5	0	0	0	deep caries	0	0	2	1	SSC	24	1		-				-	-	-	-				2	0
176	96	M	5.16438	2015-06-02	2020-07-30	54	0	0	0	1	1	0	1	1	3	0	0	0	deep caries	0	0	7	1	SSC	24	1		-				pulp canal obliteration	pulp canal obliteration	pulp canal obliteration	pulp canal obliteration				2	0
177	97	M	3.75616	2016-10-27	2020-07-29	54	0	0	0	0	0	0	1	0	1	0	0	0	deep caries	0	0	3	1	SSC	24	1		-				-	-	-	-				2	0
178	98	F	4.45479	2016-02-02	2020-07-16	55	0	1	1	0	0	0	1	1	2	0	0	0	deep caries	0	0	3	1	SSC	24	1		-				-	-	-	-				2	0
179	99	F	5.30411	2015-03-22	2020-07-09	85	1	1	0	0	0	0	1	0	1	0	0	0	deep caries	0	0	3	1	SSC	24	1		-				-	-	-	-				2	0
180	100	M	4.73699	2015-09-17	2020-06-11	54	0	0	0	1	0	0	1	1	2	0	0	0	deep caries	0	0	7	1	SSC	24	1		-				-	-	-	-				2	0
181	101	F	4.72329	2015-09-08	2020-05-28	85	1	1	0	0	0	0	1	0	1	0	0	0	deep caries	0	0	3	1	SSC	24	1		-				-	-	-	-				2	0
182	101	F	4.72329	2015-09-08	2020-05-28	74	1	0	1	0	0	0	1	1	2	0	0	0	deep caries	0	0	3	1	SSC	24	1		-				-	pulp canal obliteration	pulp canal obliteration	pulp canal obliteration				2	0
183	101	F	4.72329	2015-09-08	2020-05-28	64	0	0	0	1	0	0	1	1	2	0	0	0	deep caries	0	0	3	1	SSC	24	1		-				-	-	-	-				2	0
184	102	M	3.73973	2016-04-07	2020-01-02	75	1	1	1	0	1	0	1	1	3	0	0	0	deep caries	0	0	2	1	SSC	24	1		-				-	-	-	-				2	0
185	103	M	3.03836	2016-12-13	2019-12-27	84	1	0	1	0	0	0	1	1	2	0	0	0	deep caries	0	0	7	1	SSC	24	1		-				-	-	-	-				2	0
186	103	M	3.03836	2016-12-13	2019-12-27	74	1	0	0	0	0	0	1	0	1	0	0	0	deep caries	0	0	7	1	SSC	24	1		-				-	-	-	-				2	0
187	104	F	4.7863	2015-03-08	2019-12-19	84	1	0	1	1	0	0	1	1	3	0	0	0	deep caries	0	0	5	1	SSC	24	1		-				-	-	-	-				2	0
188	105	F	4.8	2015-02-10	2019-11-28	64	0	0	0	1	1	1	1	1	4	0	0	0	deep caries	0	0	7	1	SSC	24	1		-				-	-	-	-				2	0
189	105	F	4.8	2015-02-10	2019-11-28	54	0	0	1	0	1	1	1	1	4	0	0	0	deep caries	0	0	7	1	SSC	24	1		-				-	-	-	-				2	0
190	106	F	5.08493	2014-10-23	2019-11-22	74	1	0	1	0	0	0	1	1	2	0	0	0	deep caries	0	0	7	1	SSC	24	1		-				-	-	-	-				2	0
191	107	M	4.09863	2015-10-17	2019-11-21	85	1	1	1	1	0	0	1	1	3	0	0	0	deep caries	0	0	2	1	SSC	24	1		-				-	-	-	-				2	0
192	107	M	4.09863	2015-10-17	2019-11-21	84	1	0	1	1	0	0	1	1	3	0	0	0	deep caries	0	0	2	1	SSC	24	1		-				-	-	-	-				2	0
193	107	M	4.09863	2015-10-17	2019-11-21	74	1	0	1	1	0	0	1	1	3	0	0	0	deep caries	0	0	2	1	SSC	24	1		-				-	-	-	-				2	0
194	107	M	4.09863	2015-10-17	2019-11-21	54	0	0	0	0	1	0	1	1	2	0	0	0	deep caries	0	0	2	1	SSC	24	1		-				-	-	-	-				2	0
195	108	M	4.31507	2015-07-15	2019-11-06	84	1	0	0	1	0	0	1	1	2	0	0	0	deep caries	0	0	2	1	SSC	24	1		-				-	-	-	-				2	0
196	109	M	2.53425	2017-04-25	2019-11-06	84	1	0	0	1	0	0	1	1	2	0	0	0	deep caries	0	0	2	1	SSC	24	1		-				-	-	-	-				2	0
197	109	M	2.53425	2017-04-25	2019-11-06	64	0	0	0	0	1	0	1	1	2	0	0	0	deep caries	0	0	2	1	SSC	24	1		-				-	-	-	-				2	0
198	110	F	5.33699	2014-07-01	2019-10-31	85	1	1	1	0	1	0	1	1	3	0	0	0	deep caries	0	0	7	1	SSC	24	1		-				-	-	-	pulp canal obliteration				2	0
199	110	F	5.33699	2014-07-01	2019-10-31	84	1	0	0	1	1	0	1	1	3	0	0	0	deep caries	0	0	7	1	SSC	24	1		-				-	pulp canal obliteration	pulp canal obliteration	pulp canal obliteration				2	0
200	110	F	5.33699	2014-07-01	2019-10-31	75	1	1	1	0	1	0	1	1	3	0	0	0	deep caries	0	0	7	1	SSC	24	1		-				-	-	-	-				2	0
201	110	F	5.33699	2014-07-01	2019-10-31	64	0	0	0	1	0	0	1	1	2	0	0	0	deep caries	0	0	7	1	SSC	24	1		-				-	-	-	-				2	0
202	110	F	5.33699	2014-07-01	2019-10-31	55	0	1	1	0	1	1	1	1	4	0	0	0	deep caries	0	0	7	1	SSC	24	1		-				-	-	-	-				2	0
203	111	F	3.23562	2016-07-05	2019-09-29	84	1	0	1	0	0	0	1	1	2	0	0	0	deep caries	0	0	5	1	SSC	24	1		-				-	-	-	-				2	0
204	111	F	3.23562	2016-07-05	2019-09-29	75	1	1	1	0	1	1	1	1	4	0	0	0	deep caries	0	0	5	1	SSC	24	1		-				-	-	-	-				2	0
205	111	F	3.23562	2016-07-05	2019-09-29	74	1	0	0	1	1	0	1	1	3	0	0	0	deep caries	0	0	5	1	SSC	24	1		-				-	-	-	-				2	0
206	111	F	3.23562	2016-07-05	2019-09-29	65	0	1	1	1	1	1	1	1	5	0	0	0	deep caries	0	0	5	1	SSC	24	1		-				-	-	-	-				2	0
207	111	F	3.23562	2016-07-05	2019-09-29	55	0	1	1	1	1	1	1	1	5	0	0	0	deep caries	0	0	5	1	SSC	24	1		-				-	-	-	-				2	0
208	112	M	3.58904	2016-02-10	2019-09-12	84	1	0	0	1	0	0	1	1	2	0	0	0	deep caries	0	0	6	1	SSC	24	1		-				-	-	-	pulp canal obliteration				2	0
209	113	M	3.90685	2015-10-16	2019-09-11	84	1	0	0	1	0	0	1	1	2	0	0	0	deep caries	0	0	7	1	SSC	24	1		-				-	pulp canal obliteration	pulp canal obliteration	pulp canal obliteration				2	0
210	113	M	3.90685	2015-10-16	2019-09-11	64	0	0	0	1	1	0	1	1	3	0	0	0	deep caries	0	0	7	1	SSC	24	1		-				-	-	-	-				2	0
211	113	M	3.90685	2015-10-16	2019-09-11	54	0	0	0	1	1	0	1	1	3	0	0	0	deep caries	0	0	7	1	SSC	24	1		-				-	-	-	-				2	0
212	114	M	6.53151	2013-02-04	2019-08-16	65	0	1	1	0	0	0	1	1	2	0	0	0	deep caries	0	0	5	1	SSC	24	1		-				-	-	-	-				2	0
213	114	M	6.53151	2013-02-04	2019-08-16	54	0	0	0	1	0	0	1	1	2	0	0	0	deep caries	0	0	5	1	SSC	24	1		-				-	-	-	-				2	0
214	115	M	4.92329	2014-09-07	2019-08-09	55	0	1	0	0	0	1	1	1	2	0	0	0	deep caries	0	0	2	1	SSC	24	1		-				-	-	-	-				2	0
215	116	M	3.4	2016-03-02	2019-07-26	64	0	0	1	0	0	0	1	1	2	0	0	0	deep caries	0	0	2	1	SSC	24	1		-				-	-	-	-				2	0
216	116	M	3.4	2016-03-02	2019-07-26	54	0	0	1	1	1	0	1	1	4	0	0	0	deep caries	0	0	2	1	SSC	24	1		-				-	-	-	-				2	0
217	117	M	5.72329	2013-10-15	2019-07-05	75	1	1	0	0	0	0	1	0	1	0	0	0	deep caries	0	0	5	1	SSC	24	1		-				-	-	-	-				2	1
218	117	M	5.72329	2013-10-15	2019-07-05	55	0	1	0	0	0	0	1	0	1	0	0	0	deep caries	0	0	5	1	SSC	24	1		-				-	-	-	-				2	0
219	118	F	5.56438	2015-06-03	2020-12-24	84	1	0	0	1	0	0	1	1	2	0	0	0	deep caries	0	0	3	1	SSC	18	1		-				-	-	-					1.5	0
220	119	M	3.23836	2017-09-28	2020-12-23	85	1	1	0	1	0	0	1	1	2	0	0	0	deep caries	0	0	7	1	SSC	18	1		-				-	-	-					1.5	0
221	119	M	3.23836	2017-09-28	2020-12-23	84	1	0	0	0	0	0	1	0	1	0	0	0	deep caries	0	0	7	1	SSC	18	1		-				-	-	-					1.5	0
222	119	M	3.23836	2017-09-28	2020-12-23	54	0	0	1	1	1	0	1	1	4	0	0	0	deep caries	0	0	7	1	SSC	18	1		-				-	-	-					1.5	0
223	120	F	6.00274	2014-12-12	2020-12-11	65	0	1	1	0	0	1	1	1	3	0	0	0	deep caries	0	0	7	1	SSC	18	1		-				-	-	-					1.5	0
224	121	M	4.1726	2016-09-24	2020-11-25	64	0	0	0	1	0	0	1	1	2	0	0	0	deep caries	0	0	3	1	SSC	18	1		-				-	-	-					1.5	0
225	122	M	4.16712	2016-09-07	2020-11-06	74	1	0	1	1	1	0	1	1	4	0	0	0	deep caries	0	0	2	1	SSC	18	1		-				-	-	-					1.5	0
226	122	M	4.16712	2016-09-07	2020-11-06	64	0	0	1	1	1	0	1	1	4	0	0	0	deep caries	0	0	2	1	SSC	18	1		-				-	-	-					1.5	0
227	122	M	4.16712	2016-09-07	2020-11-06	54	0	0	1	1	1	0	1	1	4	0	0	0	deep caries	0	0	2	1	SSC	18	1		-				-	-	-					1.5	0
228	123	M	5.33699	2015-07-06	2020-11-04	85	1	1	1	0	0	0	1	1	2	0	0	0	deep caries	0	0	4	1	SSC	18	1		-				-	-	-					1.5	0
229	124	F	6.02192	2014-10-23	2020-10-29	65	0	1	1	0	0	0	1	1	2	0	0	0	deep caries	0	0	7	1	SSC	18	1		-				-	-	-					1.5	0
230	124	F	6.02192	2014-10-23	2020-10-29	55	0	1	1	0	0	0	1	1	2	0	0	0	deep caries	0	0	7	1	SSC	18	1		-				-	-	-					1.5	0
231	125	M	4.34795	2016-06-19	2020-10-23	84	1	0	0	1	0	0	1	1	2	0	0	0	deep caries	0	0	2	1	SSC	18	1		-				-	-	-					1.5	0
232	126	F	4.39178	2016-04-29	2020-09-18	84	1	0	0	1	0	0	1	1	2	0	0	0	deep caries	0	0	2	1	SSC	18	1		-				-	-	-					1.5	0
233	127	M	5.73151	2014-12-26	2020-09-17	64	0	0	0	1	0	0	1	1	2	0	0	0	deep caries	0	0	7	1	SSC	18	1		-				-	-	-					1.5	0
234	127	M	5.73151	2014-12-26	2020-09-17	55	0	1	0	0	0	1	1	1	2	0	0	0	deep caries	0	0	7	1	SSC	18	1		-				-	-	-					1.5	0
235	127	M	5.73151	2014-12-26	2020-09-17	54	0	0	0	1	0	0	1	1	2	0	0	0	deep caries	0	0	7	1	SSC	18	1		-				-	-	-					1.5	0
236	128	F	4.33151	2016-05-19	2020-09-16	85	1	1	0	0	0	0	1	0	1	0	0	0	deep caries	0	0	3	1	SSC	18	1		-				-	-	-					1.5	0
237	128	F	4.33151	2016-05-19	2020-09-16	84	1	0	0	1	0	0	1	1	2	0	0	0	deep caries	0	0	3	1	SSC	18	1		-				-	-	-					1.5	0
238	128	F	4.33151	2016-05-19	2020-09-16	55	0	1	0	0	0	0	1	0	1	0	0	0	deep caries	0	0	3	1	SSC	18	1		-				-	-	-					1.5	0
239	129	M	3.65753	2016-12-16	2020-08-12	75	1	1	1	1	1	1	1	1	5	0	0	0	deep caries	0	0	2	1	SSC	18	1		-				-	-	-					1.5	0
240	129	M	3.65753	2016-12-16	2020-08-12	65	0	1	0	1	1	0	1	1	3	0	0	0	deep caries	0	0	2	1	SSC	18	1		-				-	-	-					1.5	0
241	130	F	5.86849	2014-08-07	2020-06-18	85	1	1	1	0	0	0	1	1	2	0	0	0	deep caries	0	0	7	1	SSC	18	1		-				-	-	-					1.5	0
242	130	F	5.86849	2014-08-07	2020-06-18	84	1	0	0	1	0	0	1	1	2	0	0	0	deep caries	0	0	7	1	SSC	18	1		-				-	-	-					1.5	0
243	130	F	5.86849	2014-08-07	2020-06-18	65	0	1	1	0	0	0	1	1	2	0	0	0	deep caries	0	0	7	1	SSC	18	1		-				-	-	-					1.5	0
244	130	F	5.86849	2014-08-07	2020-06-18	64	0	0	0	1	0	0	1	1	2	0	0	0	deep caries	0	0	7	1	SSC	18	1		-				-	-	-					1.5	0
245	131	M	5.98904	2014-01-07	2020-01-02	85	1	1	1	0	0	0	1	1	2	0	0	0	deep caries	0	0	3	1	SSC	18	1		-				-	-	-					1.5	0
246	132	M	4.05753	2015-12-06	2019-12-26	84	1	0	0	0	0	0	1	0	1	0	0	0	deep caries	0	0	4	1	SSC	18	1		-				-	-	-					1.5	0
247	133	F	4.72055	2015-03-25	2019-12-12	74	1	0	1	1	0	0	1	1	3	0	0	0	deep caries	0	0	5	1	SSC	18	1		-				-	-	-					1.5	0
248	134	F	4.57808	2015-05-09	2019-12-05	75	1	1	1	0	0	1	1	1	3	0	0	0	deep caries	0	0	3	1	SSC	18	1		-				-	-	-					1.5	0
249	135	F	4.74521	2015-03-09	2019-12-05	75	1	1	1	0	0	0	1	1	2	0	0	0	deep caries	0	0	2	1	SSC	18	1		-				-	-	-					1.5	0
250	136	F	4.99452	2014-12-02	2019-11-29	64	0	0	1	0	1	0	1	1	3	0	0	0	deep caries	0	0	7	1	SSC	18	1		-				-	-	-					1.5	0
251	136	F	4.99452	2014-12-02	2019-11-29	55	0	1	0	0	0	1	1	1	2	0	0	0	deep caries	0	0	7	1	SSC	18	1		-				-	-	-					1.5	0
252	136	F	4.99452	2014-12-02	2019-11-29	54	0	0	0	0	1	1	1	1	3	0	0	0	deep caries	0	0	7	1	SSC	18	1		-				-	-	-					1.5	0
253	137	F	4.39452	2015-07-02	2019-11-22	75	1	1	0	1	1	0	0	1	2	0	0	0	deep caries	0	0	7	1	SSC	18	1		-				-	-	-					1.5	0
254	137	F	4.39452	2015-07-02	2019-11-22	74	1	0	0	1	0	0	1	1	2	0	0	0	deep caries	0	0	7	1	SSC	18	1		-				-	-	-					1.5	0
255	138	M	6.73973	2013-01-21	2019-10-17	55	0	1	1	0	0	0	1	1	2	0	0	0	deep caries	0	0	2	1	SSC	18	1		-				-	-	-					1.5	0
256	138	M	6.73973	2013-01-21	2019-10-17	54	0	0	1	0	1	0	1	1	3	0	0	0	deep caries	0	0	2	1	SSC	18	1		-				-	-	-					1.5	0
257	139	M	3.09863	2016-09-05	2019-10-11	64	0	0	1	0	1	1	0	1	3	0	0	0	deep caries	0	0	5	1	SSC	18	1		-				-	-	-					1.5	0
258	139	M	3.09863	2016-09-05	2019-10-11	54	0	0	1	1	0	0	1	1	3	0	0	0	deep caries	0	0	5	1	SSC	18	1		-				-	-	-					1.5	0
259	140	F	4.46301	2015-04-26	2019-10-11	85	1	1	1	0	0	0	1	1	2	0	0	0	deep caries	0	0	2	1	SSC	18	1		-				-	-	-					1.5	0
260	141	M	3.77808	2015-11-04	2019-08-14	65	0	1	0	0	0	1	1	1	2	0	0	1	deep caries	0	0	2	1	SSC	18	1		-				-	-	-					1.5	0
261	142	M	7.08493	2012-06-19	2019-07-19	75	1	1	1	0	0	0	1	1	2	0	0	0	deep caries	0	0	2	1	SSC	18	1		-				-	-	-					1.5	0
262	142	M	7.08493	2012-06-19	2019-07-19	55	0	1	1	0	0	1	1	1	3	0	0	0	deep caries	0	0	2	1	SSC	18	1		-				-	-	-					1.5	0
263	143	M	3.5726	2015-12-23	2019-07-19	84	1	0	1	1	0	0	1	1	3	0	0	0	deep caries	0	0	5	1	SSC	18	1		-				-	-	-					1.5	0
264	143	M	3.5726	2015-12-23	2019-07-19	74	1	0	1	1	0	0	1	1	3	0	0	0	deep caries	0	0	5	1	SSC	18	1		-				-	-	-					1.5	0
265	143	M	3.5726	2015-12-23	2019-07-19	64	0	0	1	0	0	0	1	1	2	0	0	0	deep caries	0	0	5	1	SSC	18	1		-				-	-	-					1.5	0
266	143	M	3.5726	2015-12-23	2019-07-19	54	0	0	1	0	0	0	1	1	2	0	0	0	deep caries	0	0	5	1	SSC	18	1		-				-	-	-					1.5	0
